# 1                    **Mathematical Modeling Reveals Quantitative Properties**

## 2                                            **of KEAP1-NRF2 Signaling**

3

4                                            Shengnan Liu<sup>1,2</sup>, Jingbo Pi<sup>1</sup>, and Qiang Zhang<sup>2</sup>

5

6    <sup>1</sup> Program of Environmental Toxicology, School of Public Health, China Medical University,  
7    Shenyang, 110122, China

8

9    <sup>2</sup> Gangarosa Department of Environmental Health, Rollins School of Public Health, Emory  
10    University, Atlanta, GA, 30322, USA

11

12

13

14    Corresponding author:

15                                            Qiang Zhang, M.D., Ph.D.

16                                            Gangarosa Department of Environment Health

17                                            Rollins School of Public Health

18                                            Emory University

19                                            1518 Clifton Road NE

20                                            Mailstop 1518-002-2BB

21                                            Atlanta, Georgia 30322

22                                            E-mail: qiang.zhang@emory.edu

23

## ABSTRACT

24 In response to oxidative and electrophilic stresses, cells launch an NRF2-mediated  
25 transcriptional antioxidant program. The activation of NRF2 depends on a redox sensor, KEAP1,  
26 which acts as an E3-ligase adaptor to promote the ubiquitination and degradation of NRF2.  
27 While a great deal has been learned about the molecular details of KEAP1, NRF2, and their  
28 interactions, the quantitative aspects of signal transfer conveyed by this redox duo are still  
29 largely unexplored. In the present study, we examined the signaling properties including  
30 response time, half-life, maximal activation, and response steepness (ultrasensitivity) of NRF2,  
31 through a suite of mathematical models. The models describe, with increasing complexity, the  
32 reversible binding of KEAP1 dimer and NRF2 via the ETGE and DLG motifs, NRF2 production,  
33 KEAP1-dependent and independent NRF2 degradation, and perturbations by different classes of  
34 NRF2 activators. Our simulations revealed that at the basal condition, NRF2 molecules are  
35 largely sequestered by KEAP1, with the KEAP1-NRF2 complex comparably distributed in either  
36 an ETGE-bound only (open) state or an ETGE and DLG dual-bound (closed) state,  
37 corresponding to the unlatched and latched configurations of the conceptual hinge-latch model.  
38 With two-step ETGE binding, the open and closed states operate in cycle mode at the basal  
39 condition and transition to equilibrium mode at stressed conditions. Class I-V, electrophilic NRF2  
40 activators, which modify redox-sensing cysteine residues of KEAP1, shift the balance to a closed  
41 state that is unable to degrade NRF2 effectively. Total NRF2 has to accumulate to a level that  
42 nearly saturates existing KEAP1 to make sufficient free NRF2, therefore introducing a signaling  
43 delay. At the juncture of KEAP1 saturation, ultrasensitive NRF2 activation, i.e., a steep rise in the  
44 free NRF2 level, can occur through two simultaneous mechanisms, zero-order degradation  
45 mediated by DLG binding and protein sequestration (molecular titration) mediated by ETGE  
46 binding. These response characteristics of class I-V activators do not require disruption of DLG  
47 binding to unlatch the KEAP1-NRF2 complex. In comparison, class VI NRF2 activators, which  
48 directly compete with NRF2 for KEAP1 binding, can unlatch or even unhinge the KEAP1-NRF2

49 complex. This causes a shift to the open state of KEAP1-NRF2 complex and ultimately its  
50 complete dissociation, resulting in a fast release of free NRF2 followed by stabilization. Although  
51 class VI activators may induce free NRF2 to higher levels, ultrasensitivity is lost due to lower free  
52 KEAP1 and thus its NRF2-sequestering effect. Stress-induced NRF2 nuclear accumulation is  
53 enhanced when basal nuclear NRF2 turnover constitutes a small load to NRF2 production. Our  
54 simulation further demonstrated that optimal abundances of cytosolic and nuclear KEAP1 exist  
55 to maximize ultrasensitivity. In summary, by simulating the dual role of KEAP1 in repressing  
56 NRF2, i.e., sequestration and promoting degradation, our mathematical modeling provides key  
57 novel quantitative insights into the signaling properties of the crucial KEAP1-NRF2 module of the  
58 cellular antioxidant response pathway.

59

60 **Keywords:** Oxidative Stress, KEAP1, NRF2, Ultrasensitivity, Protein Sequestration, Zero-order  
61 degradation

62

63

## INTRODUCTION

64 Under oxidative stress, the antioxidant capacity of cells is upregulated to meet the increasing  
65 demand for reactive species removal to maintain cellular redox homeostasis and limit cellular  
66 damage (Nguyen et al. 2003). Similar to many other cytoprotective responses, this adaptive  
67 antioxidant response is underpinned by a complex molecular circuitry of primarily negative  
68 feedback and incoherent feedforward nature, involving both posttranslational and transcriptional  
69 regulations (Zhang et al. 2010, Zhang et al. 2015). In mammalian cells, the main circuit mediating  
70 the transcriptional part of the antioxidant response is the KEAP1-NRF2-ARE pathway  
71 (Kobayashi et al. 2009). KEAP1 (Kelch ECH associating protein 1) is the molecular thiol-based  
72 sensor of ROS and other reactive species, which detects the redox status inside the cell and  
73 relays it to NRF2 (nuclear factor erythroid 2-related factor 2) (Dinkova-Kostova et al. 2002,  
74 Suzuki and Yamamoto 2017). As the master transcription factor, NRF2 partners with small Maf  
75 (sMaf) proteins to recognize promoter consensus sequences containing AREs (antioxidant  
76 response element) and induce a suite of target genes participating in antioxidant and  
77 detoxification reactions (Katsuoka et al. 2005, Kobayashi and Yamamoto 2005, Malhotra et al.  
78 2010, Bellezza et al. 2018, Tonelli et al. 2018).

79

80 As the essential components for the transcriptional induction of antioxidant genes, the  
81 KEAP1 and NRF2 proteins and their interactions have been learned in great details in the past  
82 two decades (Itoh et al. 2010, Yamamoto et al. 2018, Paunkov et al. 2019, Baird and Yamamoto  
83 2020). Tethered to the perinuclear actin cytoskeleton in the cytosol, KEAP1 functions as a  
84 homodimer (McMahon et al. 2006, Watai et al. 2007, Ogura et al. 2010). The KEAP1 peptide is  
85 composed of 624 amino acid residues forming five functional domains: NTR (N-terminal region),  
86 BTB (Broad complex, Tramtrack, and Bric-a-Brac), IVR (intervening region), DGR (double  
87 glycine repeat) or Kelch-repeat, and CTR (C-terminal region) (Canning et al. 2015, Dayalan  
88 Naidu and Dinkova-Kostova 2020). The BTB domain at the N-terminal is responsible for the

89 formation of KEAP1 homodimer (Zipper and Mulcahy 2002). The neighboring Kelch and CTR  
90 domains (collectively termed as DC region) are responsible for the interaction of KEAP1 with  
91 NRF2 (Li et al. 2004, Lo et al. 2006). As a redox sensor, KEAP1 contains 27 cysteine residues  
92 distributed across the five domains, many of which can be modified or conjugated on the thiol  
93 group by oxidants and electrophiles (Dinkova-Kostova et al. 2002, Yamamoto et al. 2008, Sekhar  
94 et al. 2010).

95

96 The NRF2 protein is composed of 589 amino acids forming six functional domains, Neh1  
97 through Neh6 (Moi et al. 1994, Tonelli et al. 2018). The Neh2 domain on the N-terminal is  
98 responsible for the binding with the KEAP1 dimer (Itoh et al. 1999). Within Neh2, there exist two  
99 conserved motifs in the N-to-C direction: DLG and ETGE, with an intervening sequence  
100 containing 7 lysine residues that can be ubiquitinated (Tong et al. 2006, Tong et al. 2007). Both  
101 motifs are involved in mediating the association between NRF2 and KEAP1 dimer. The ETGE  
102 motif can bind to the DC region of one of the monomeric subunits of KEAP1 dimer, and the DLG  
103 motif of the same NRF2 molecule binds to the DC region of the other subunit (McMahon et al.  
104 2006). Therefore, the KEAP1-NRF2 complex exists at an internal molar ratio of 2:1 (Tong et al.  
105 2006, Horie et al. 2021). The binding affinities between ETGE and KEAP1 and between DLG and  
106 KEAP1 are substantially different, with ETGE nearly 100-fold higher than DLG (Lo et al. 2006,  
107 Tong et al. 2006, Chen et al. 2011, Ichimura et al. 2013, Fukutomi et al. 2014). It is therefore  
108 expected that the binding between KEAP1 and NRF2 occurs primarily in two sequential events:  
109 an initial ETGE-mediated association forming an “open” KEAP1-NRF2 complex, and a  
110 subsequent DLG-mediated intra-complex association forming a “closed” KEAP1-NRF2 complex  
111 (Tong et al. 2006).

112

113 By interacting with CUL3 (Cullin 3) via its BTB and IVR domains, KEAP1 is an adaptor of  
114 the KEAP1-CUL3-RBX1 E3 ubiquitin ligase complex (Kobayashi et al. 2004). When KEAP1 is

115 associated with NRF2 in the closed state, KEAP1 is able to enable the transfer of ubiquitin  
116 molecules from the E2-ubiquitin conjugating enzyme bound to RBX1 (RING-box protein 1) to the  
117 7 lysine residues in the intervening region between the DLG and ETGE motifs of NRF2 (Kato et  
118 al. 2005, Tong et al. 2006, Tong et al. 2007). Once ubiquitinated, NRF2 is rapidly degraded by  
119 the proteasomal pathway (Kobayashi et al. 2006). Therefore, at basal conditions, NRF2 in the  
120 cytosol has a very short half-life, mostly ranging between 6-20 min (Kwak et al. 2002, Alam et al.  
121 2003, Itoh et al. 2003, Stewart et al. 2003, Kobayashi et al. 2004, He et al. 2006, Khalil et al.  
122 2015, Crinelli et al. 2021). Under oxidative stress, certain sensor cysteine residues on KEAP1  
123 are modified, which disables KEAP1's capability of mediating NRF2 ubiquitination (Yamamoto et  
124 al. 2008, Sekhar et al. 2010, Suzuki and Yamamoto 2017). As a result, NRF2 is stabilized and  
125 accumulates via *de novo* synthesis in the cytosol. Rising NRF2 then translocates into the nuclei  
126 where it induces antioxidant and detoxification genes (Kobayashi and Yamamoto 2005, Itoh et al.  
127 2010, Tonelli et al. 2018).

128

129 Despite the molecular details of KEAP1 and NRF2 interactions have been revealed to a  
130 great extent, the quantitative signaling properties of the duo, culminating in NRF2 accumulation  
131 and nuclear translocation, are still poorly understood. It has been demonstrated that the binding  
132 between KEAP1 and NRF2 is not altered by oxidative stress, such that NRF2 does not dissociate  
133 from KEAP1 (Eggleter et al. 2005, He et al. 2006, Kobayashi et al. 2006). Since the discovery of  
134 the two-site sequential binding scheme for KEAP1-NRF2 interaction, i.e., first through ETGE and  
135 then through DLG, a hinge-latch model has been proposed (Tong et al. 2006, Tong et al. 2007,  
136 Fukutomi et al. 2014). The model considers that the ETGE-mediated association (the hinge)  
137 between KEAP1 and NRF2 is always engaged regardless of the presence of oxidative stressors.  
138 However, oxidative stressors may disrupt the weaker DLG-mediated association (the latch),  
139 rendering the closed KEAP1-NRF2 complex to revert to the open configuration (McMahon et al.  
140 2006, Ogura et al. 2010). In the open state, KEAP1 can no longer mediate the ubiquitination of

141 NRF2, resulting in NRF2 stabilization. However, the validity of the hinge-latch model for KEAP1  
142 cysteine-modifying, electrophilic oxidants (i.e., class I-V NRF2 inducers) becomes questionable  
143 as emerging evidence suggests that these classes of compounds do not disrupt DLG binding  
144 (Horie et al. 2021). Studies using Förster resonance energy transfer (FRET) revealed that the  
145 association between KEAP1 and NRF2 may become even stronger when cells are exposed to  
146 KEAP1 cysteine-modifying compounds (Baird et al. 2013).

147

148         The ETGE-mediated binding affinity between KEAP1 and NRF2 is high relative to their  
149 cellular abundances, with the dissociation constant ( $K_d$ ) ranging between 5-26 nM, as  
150 summarized in Table S1 footnote (Lo et al. 2006, Tong et al. 2006, Chen et al. 2011, Ichimura et  
151 al. 2013, Fukutomi et al. 2014), and the intracellular concentrations of KEAP1 dimer and NRF2 in  
152 the order of hundreds of nM as observed in a variety of cell types (Iso et al. 2016). This suggests  
153 that when KEAP1 is in excess relative to NRF2, as often the case at the basal condition, NRF2  
154 molecules are largely sequestered by KEAP1, leaving free NRF2 only a very small fraction of its  
155 total abundance. Such binding kinetics suggests that under oxidative stress, newly synthesized  
156 NRF2 molecules will be still first sequestered by the remaining free KEAP1 reserve, and only  
157 when it is nearly all filled by NRF2, will NRF2 becomes more available for nuclear translocation.  
158 Therefore, the degree of NRF2 activation is in part regulated by the KEAP1 reserve capacity of  
159 NRF2 sequestration. This mode of NRF2 activation is recently suggested in the floodgate  
160 hypothesis (Iso et al. 2016, Suzuki and Yamamoto 2017, Yamamoto et al. 2018). If total NRF2  
161 never accumulates to a level that can saturate existing KEAP1 molecules, nuclear NRF2  
162 translocation and gene induction will remain muted. However, if total NRF2 can rise to a higher  
163 level that nearly saturates KEAP1, from a quantitative signaling prospective, KEAP1-dependent  
164 NRF2 degradation will operate near zero order and simultaneously NRF2 begins to escape  
165 KEAP1 sequestration, both of which are robust ultrasensitive mechanisms that can produce a  
166 steep rise in free NRF2 levels (Buchler and Louis 2008, Zhang et al. 2013, Ferrell and Ha 2014).

167 This amplified, nonlinear NRF2 activation can in turn induce antioxidant genes strongly.  
168 Therefore, the kinetic parameters governing the interactions between KEAP1 dimer and NRF2  
169 seem to be critical to the quantitative behaviors of KEAP1-NRF2-ARE-mediated redox signal  
170 transduction.

171

172 From the perspective of effectively restoring redox homeostasis, the induction of these  
173 antioxidant genes needs to be launched timely and to levels that are sufficient to counteract the  
174 oxidative impacts exerted by the stressors (Zhang et al. 2010). Strong antioxidant induction  
175 would require signal amplification, i.e., ultrasensitivity, by which a small percentage change in the  
176 redox status can be transduced to induce a larger percentage change in the expression of  
177 antioxidant genes (Zhang et al. 2013, Ferrell and Ha 2014). a number of ultrasensitive  
178 mechanisms, including multistep signaling, homomultimerization, and autoregulation, have been  
179 revealed in the KEAP1-NRF2-ARE mediated transcriptional pathway (Zhang and Andersen 2007,  
180 Zhang et al. 2010). They operate collectively to ensure that the cellular antioxidant capacity can  
181 be adequately induced to levels matching the intensity of the oxidant insult.

182

183 Mathematical modeling plays a crucial role in understanding and predicting the  
184 quantitative behavior of redox pathways (Adimora et al. 2010, Selvaggio et al. 2018). Earlier  
185 modeling work including our own has included the KEAP1-NRF2 module in the larger context of  
186 the NRF2-mediated antioxidant response pathways (Zhang and Andersen 2007, Zhang et al.  
187 2009, Hamon et al. 2014, Leclerc et al. 2014, Khalil et al. 2015, Xue et al. 2015, Kolodkin et al.  
188 2020). However, in most of these studies the KEAP1-NRF2 module was treated as simplified  
189 degradation network motifs, yet the details of KEAP1-NRF2 interactions and especially the likely  
190 nonlinearity in signaling have not been explicitly and fully explored. In the present study, we  
191 developed a suite of mathematical models of detailed KEAP1-NRF2 interactions to explore the  
192 quantitative properties of NRF2 activation. With these models we examined the roles of open



193 and closed states of the KEAP1-NRF2 complex for the hinge-latch and floodgate hypotheses.  
194 Our simulation predicts that ultrasensitive NRF2 activation may occur via zero-order protein  
195 degradation and protein sequestration by KEAP1 under certain circumstances. Our  
196 mathematical models provide key quantitative insights into the signaling properties of the  
197 KEAP1-NRF2 module of the adaptive, cellular antioxidant response pathway.  
198

199  
200  
201  
202  
203  
204  
205  
206  
207  
208  
209  
210  
211  
212  
213  
214  
215  
216  
217  
218  
219  
220  
221  
222  
223  
224

## METHODS

### ***Model structure***

In keeping with the principle of parsimony and exploring the importance of molecular details, we started with a minimal model capturing the basic interactions between KEAP1 and NRF2, and we then progressively built more complexity into the model based on more recent quantitative knowledge about the interactions. As a result of this evolution, a total of 6 models were explored with increasing complexities, as summarized in Table 1. For all models, the following assumptions were made.

- (i) KEAP1 is treated as a single molecule of homodimer with two binding sites for NRF2 as the dimer structure is required for NRF2 binding (Zipper and Mulcahy 2002).
- (ii) Total KEAP1 abundance is a constant which is not altered by oxidative stress as extensively demonstrated in experimental studies (Iso et al. 2016) and KEAP1 turnover (synthesis and degradation) is not considered.
- (iii) Since the binding affinity between KEAP1 and the ETGE motif of NRF2 is much higher than the binding affinity between KEAP1 and the DLG motif of NRF2 (> 100-fold), as summarized in Table S1 (Lo et al. 2006, Tong et al. 2006, Chen et al. 2011, Ichimura et al. 2013, Fukutomi et al. 2014), for simplicity and following the concept of hinge-latch hypothesis (Yamamoto et al. 2018), the initial interaction between KEAP1 and NRF2 is assumed to always start with the binding between KEAP1 and ETGE while the binding between KEAP1 and DLG occurs subsequently, as an intramolecular event.
- (iv) Oxidation or conjugation of one monomeric subunit of the KEAP1 dimer by a class I-V NRF2 activator is sufficient to cause KEAP1 to lose its ability to mediate NRF2 degradation. The oxidation or conjugation can occur to either free KEAP1 dimer or KEAP1 complexed with NRF2 equally.
- (v) For the Models (4a and 4b) with nuclear NRF2 translocation, cytosolic KEAP1 and nuclear KEAP1 are kept as separate pools.

225

226 Model 1 is the most basic model, which captures the known essence of interactions  
227 between KEAP1 and NRF2 in the cytosol as shown in Fig. 1. In model 1, NRF2 is synthesized at  
228 a constant rate of  $k_0$ . Free NRF2 ( $NRF2_{free}$ ) is degraded with a first-order rate constant of  $k_5$ ,  
229 reflecting KEAP1-independent degradation such as the one mediated by the Neh6 domain  
230 involving the GSK-3,  $\beta$ -TrCP and Cul1 system (McMahon et al. 2004, Rada et al. 2011,  
231 Chowdhry et al. 2013, Hayes et al. 2015).  $NRF2_{free}$  first binds to one of the monomeric subunits  
232 of the KEAP1 dimer through the ETGE domain with a second-order association rate constant  $k_1$   
233 and a first-order dissociation rate constant  $k_2$ , forming an intermediate complex  
234  $KEAP1\_NRF2_{open}$  (termed open state here). Since KEAP1 in the open state of the complex  
235 cannot execute its E3 ligase adaptor function (Kato et al. 2005, Tong et al. 2006, Tong et al.  
236 2007), NRF2 in  $KEAP1\_NRF2_{open}$  is assumed to be degraded with a first-order rate constant of  $k_9$   
237 that is equal to  $k_5$ . As NRF2 is degraded, KEAP1 is recycled joining the free KEAP1 dimer pool.  
238 The NRF2 molecule in  $KEAP1\_NRF2_{open}$  then further associates with the other unoccupied  
239 monomeric subunit of KEAP1 dimer through the DLG motif with a first-order association rate  
240 constant  $k_3$  and a first-order dissociation rate constant  $k_4$ , forming the final complex  
241  $KEAP1\_NRF2_{closed}$  (termed closed state here). NRF2 in  $KEAP1\_NRF2_{closed}$  is degraded with a  
242 first-order rate constant of  $k_6$  which is much higher than  $k_5$  and  $k_9$ , reflecting KEAP1-mediated  
243 ubiquitination and accelerated degradation of NRF2, and KEAP1 dimer is recycled. Class I-V  
244 oxidants and electrophiles can oxidize or conjugate KEAP1 (Yamamoto et al. 2008, Sekhar et al.  
245 2010, Suzuki and Yamamoto 2017). In the model the oxidant converts  $KEAP1$  to an oxidized  
246 form,  $KEAP1_o$ , with a second-order rate constant  $k_7$ . The same oxidation reaction is assumed to  
247 occur on the KEAP1 molecule in  $KEAP1\_NRF2_{open}$  and  $KEAP1\_NRF2_{closed}$  as well, forming  
248  $KEAP1_o\_NRF2_{open}$  and  $KEAP1_o\_NRF2_{closed}$  respectively.  $KEAP1_o$ ,  $KEAP1_o\_NRF2_{open}$ , and  
249  $KEAP1_o\_NRF2_{closed}$  can be reduced back to the respective original states with a first-order rate

250 constant  $k_8$ . Since there is no evidence that the association of KEAP1 with NRF2 alters the  
251 kinetics of oxidation or conjugation of KEAP1 by oxidants, the same values of  $k_7$  and  $k_8$  are used  
252 across all three oxidation/reduction reaction pairs. Since the alteration of NRF2 stability only  
253 occurs in the closed state, NRF2 in  $KEAP1_o\_NRF2_{open}$  is degraded with a first-order rate  
254 constant of  $k'_9$  that is equal to  $k_9$ . NRF2 in  $KEAP1_o\_NRF2_{closed}$  is degraded with a first-order rate  
255 constant of  $k'_6$  that is much lower than  $k_6$ , reflecting the well-established fact that  
256 oxidant-modified KEAP1 in the closed state loses its capability to mediate the ubiquitination and  
257 degradation of NRF2 (Kato et al. 2005, Tong et al. 2006, Tong et al. 2007). In both the  $k'_9$  and  $k'_6$   
258 steps,  $KEAP1_o$  is recycled joining the free  $KEAP1_o$  pool. The binding between  $NRF2_{free}$  and  
259  $KEAP1_o$  through the ETGE domain is described by the second-order association rate constant  
260  $k'_1$  and first-order dissociation rate constant  $k'_2$ , which are kept the same as  $k_1$  and  $k_2$  respectively  
261 since class I-V oxidants do not alter the binding affinity between KEAP1 and NRF2 (Eggler et al.  
262 2005, He et al. 2006, Kobayashi et al. 2006). The association and dissociation rate constants  $k'_3$   
263 and  $k'_4$  for the intramolecular DLG binding between  $KEAP1_o\_NRF2_{open}$  and  $KEAP1_o\_NRF2_{closed}$   
264 are also kept the same as  $k_3$  and  $k_4$  respectively, however, their values are varied to explore the  
265 behavior of the hinge-latch hypothesis.

266

267 The detailed structure of Models 2, 3a, 3b, 4a, and 4b are presented in Figs. 1, 4A, 8A,  
268 9A, and 10A, respectively. Briefly, in Model 2, the DLG-mediated internal binding kinetics ( $k_3$  and  
269  $k_4$ ) between  $KEAP1\_NRF2_{open}$  and  $KEAP1\_NRF2_{closed}$  is modified from Model 1 to simulate the  
270 situation that the transitioning between the two states occurs in a cycle mode rather than an  
271 equilibrium mode, as observed experimentally (Baird et al. 2013). In Models 3a and 3b, the  
272 ETGE-mediated binding between KEAP1 and NRF2 is modified from the one-step mode as in  
273 Models 1 and 2 to a two-step mode to simulate the situation that ETGE-mediated binding  
274 involves an initial fast binding event followed by a subsequent slow binding event observed  
275 experimentally (Fukutomi et al. 2014). This modification allows us to achieve the cycle mode of

276 operation without altering the DLG-mediated binding kinetics dramatically as done in Model 2.  
277 Models 3a and 3b consider class I-V and VI NRF2 inducers as separate cases respectively.  
278 Lastly, in Models 4a and 4b, translocation of NRF2 to the nucleus and its interaction with KEAP1  
279 in the nucleus are considered, and the two models consider class I-V and VI NRF2 activators as  
280 separate cases respectively.

281

### 282 ***Model parameters and ordinary differentiation equations (ODEs)***

283 The values of most of the model parameters, including binding rate constants, degradation rate  
284 constants, and abundances (concentrations) of KEAP1 and NRF2, were obtained or derived  
285 from the literature. For those unknown parameter values, they were estimated based on other  
286 constraints of the modeled system. References and details of the determination and calculation  
287 of all parameter values are presented in Table S1 and its footnote. The unit of concentration of  
288 the state variables is nM and time is second (S). The ODEs are presented in Tables S2-S6 and  
289 algebraic equations calculating the concentrations of state variables in various combinations are  
290 presented in Table S7. The steady-state concentrations of state variables at the basal and  
291 maximally induced conditions are in Tables S8 and S9 respectively, and the steady-state  
292 turnover fluxes of reactions at the basal and maximally induced conditions are in Tables S10 and  
293 S11 respectively.

294

### 295 ***Modeling tools***

296 The models were constructed and simulated in Berkeley Madonna (version 8.3.18, University of  
297 California, Berkeley, CA) using the “Rosenbrock (stiff)” ODE solver. All model codes in Berkeley  
298 Madonna format are available as additional Supplemental files.

299

### 300 ***Metrics of ultrasensitivity***

301 In the present study, all oxidant-NRF2 dose-response (DR) curves were obtained once the

302 simulation has achieved steady state. The degree of ultrasensitivity of a steady-state DR curve  
303 can be evaluated with two related metrics. First, the Hill coefficient,  $n_H$ , is approximated from the  
304 equation

$$305 \quad n_H = \frac{\ln 81}{\frac{\ln X_{0.9}}{\ln X_{0.1}}}, \quad (1)$$

306 where  $X_{0.9}$  and  $X_{0.1}$  are the concentrations of an oxidant that produce 90% and 10% respectively  
307 of the maximal NRF2 response (after subtracting the basal NRF2 levels) (Zhang et al. 2013).  $n_H$   
308 represents the overall steepness or global degree of ultrasensitivity of the DR curve. Second, we  
309 evaluate the local response coefficient (*LRC*) of a DR curve by calculating all slopes of the curve  
310 on dual-log scales, which are equivalent to the ratios of the fractional change in response ( $R$ ) to  
311 the fractional change in dose ( $D$ ) (Goldbeter and Koshland 1982):

$$312 \quad LRC = \frac{d \ln R}{d \ln D}. \quad (2)$$

313 The maximal  $|LRC|$  of a DR curve,  $LRC_{max}$ , represents the maximal amplification capacity of  
314 KEAP1-NRF2-mediated signaling. Typical ultrasensitive responses have  $LRC_{max}$  values  
315 substantially above 1. The comparison between  $n_H$  and  $LRC$  is important as these quantities are  
316 not necessarily equivalent and depend on the basal response level and the shape of the DR  
317 curve; thus,  $n_H$  alone can misrepresent the actual degree of signal amplification (Legewie et al.  
318 2005, Zhang et al. 2013, Altszyler et al. 2017).

319  
320

321

## Results

### 322 **Model 1 (Equilibrium Mode)**

323 Model 1 is the minimal model, involving only basic cytosolic KEAP1 and NRF2 interactions  
324 through ETGE and DLG motifs (Fig. 1A). At the basal steady state, due to the strong binding  
325 between KEAP1 and NRF2 through ETGE, the majority of NRF2 is sequestered by KEAP1,  
326 leaving *free NRF2* ( $NRF2_{free}$ ), at 2 nM, just a tiny fraction of *total NRF2* ( $NRF2_{tot}$ ), which is at 150  
327 nM (Fig. 2A and Table S8). The open state of the KEAP1-NRF2 complex ( $KEAP1\_NRF2_{open}$ ), in  
328 which the association is through ETGE only, and the closed state of the complex  
329 ( $KEAP1\_NRF2_{closed}$ ), in which the association is through both ETGE and DLG, are equal to each  
330 other in concentration at 74 nM and much higher than  $NRF2_{free}$ . The comparable levels between  
331 the open and closed states are consistent with what was observed experimentally in HEK293  
332 cells (Baird et al. 2013). When the synthesis of NRF2 is terminated by setting  $k_0=0$ , all NRF2  
333 species including  $NRF2_{free}$ ,  $KEAP1\_NRF2_{open}$  and  $KEAP1\_NRF2_{closed}$ , degrade exponentially,  
334 and the half-life of  $NRF2_{tot}$  is 10 min (Fig. 2A).

335

336 To examine the basic behavior of the model when NRF2 in  $KEAP1\_NRF2_{closed}$  is  
337 stabilized, as would occur during oxidative stress, we first lowered  $k_6$  to different values, while  
338 keeping *class I-V activator* at zero ( $CLASS_{I-V}=0$ ) for simplicity. As  $k_6$  decreases from the default  
339  $2.03E-3\ S^{-1}$  (equivalent half-life  $t_{1/2}=5.7$  min for  $KEAP1\_NRF2_{closed}$ ) to  $1.178E-4$  (which is the  
340 default value of  $k'_6$  for degradation of  $KEAP1\_NRF2_{closed}$ , equivalent  $t_{1/2}=98$  min), all NRF2  
341 species increase and reach steady states in about 300 min (Fig. 2B).  $KEAP1\_NRF2_{open}$  and  
342  $KEAP1\_NRF2_{closed}$  reach the steady states the fastest, follows by  $NRF2_{free}$  and  $NRF2_{tot}$ . There is  
343 an apparent delay in the  $NRF2_{free}$  response.  $NRF2_{tot}$  increases by 5-fold, from 150 to 750 nM,  
344 while  $NRF2_{free}$  increases by a much greater fold, from 2 to 230 nM. At this activated state, by  
345 setting  $k_0=0$ , all NRF2 species degrade but at different rates with  $NRF2_{free}$  disappearing much  
346 more quickly, and the half-life of  $NRF2_{tot}$  is 54 min (Fig. 2B). By setting  $k_6$  to an even lower value

347 (0.589E-4), the steady-state levels of both  $NRF2_{free}$  and  $NRF2_{tot}$  increase but only to a limited  
348 extent, and the half-life of  $NRF2_{tot}$  lengthens to 65 min (Fig. S1A). When  $k_6$  is lowered to zero,  
349 mimicking complete shutoff of KEAP1-mediated NRF2 degradation,  $NRF2_{tot}$  only increases to  
350 858 nM, a 5.7-fold increase from the basal level and its half-life lengthens to 78 min, while  
351  $NRF2_{free}$  increases by 117-fold (Fig. S1C). The behavior when  $k_6=0$  represents the maximal  
352 response Model 1 can be induced. We next examined the steady-state dose-response behavior  
353 of Model 1 by varying the  $CLASS_{i,v}$  level. With  $k'_6$  at the default value,  $NRF2_{free}$  exhibits an  
354 ultrasensitive, sigmoidal dose-response with Hill coefficient ( $n_H$ ) of 2.02 and maximal local  
355 response coefficient ( $LRC_{max}$ ) of 1.92 (Figs. 2C in dual-log scale and 2D in dual-linear scale).  
356  $NRF2_{tot}$  is subsensitive with a much shallower dose-response curve. Setting  $k'_6$  to lower values  
357 increases the ultrasensitivity of  $NRF2_{free}$  slightly as its maximal steady-state level increases (Figs.  
358 S1B and S1D).

359

360 An interesting feature of Model 1 is that the open and closed KEAP1-NRF2 complexes  
361 ( $KEAP1\_NRF2_{open}$  and  $KEAP1\_NRF2_{closed}$ ) behave in an almost synchronized fashion in that  
362 their abundance ratio remains at 1:1 at all times in all conditions (Figs. 2A-2C and S1),  
363 suggesting these two species are always at equilibrium to each other. Using FRET to track the  
364 open and closed states of KEAP1-NRF2 complex, Baird et al. observed that the two states  
365 diverge and do not follow an equilibrium mode of operation in a variety of chemically perturbed  
366 conditions (Baird et al. 2013). But rather, a “cyclic sequential attachment and regeneration”  
367 (abbreviated as “cycle”) mode of operation was suggested. In this mode, because of the rapid  
368 degradation of NRF2 in the closed KEAP1-NRF2 complex, KEAP1 is quickly released (or  
369 regenerated) to join the free KEAP1 dimer pool and sequester newly synthesized NRF2 again,  
370 thus completing a global cycle for KEAP1. Under oxidative stress, this cycle is blocked as the  
371 NRF2 degradation-coupled release of KEAP1 from the closed KEAP1-NRF2 complex is inhibited,  
372 leading to accumulation of the closed state and depletion of free KEAP1 dimer. Therefore, in the



373 next section, we evolved Model 1 into Model 2 such that the model behavior is aligned with the  
374 cycle mode of operation.

375

### 376 **Model 2 (Cycle Mode)**

377 Examining the basal steady-state behaviors of Model 1 revealed that the two fluxes of the  
378 reversible conversion between  $KEAP1\_NRF2_{open}$  and  $KEAP1\_NRF2_{closed}$  are comparable to  
379 each other ( $flux_{k3} = 14.645$  and  $flux_{k4} = 14.495$  nM/S) and overwhelmingly dominant over the  
380 connected turnover fluxes ( $> 96$ -fold of  $flux_{k6}$  and  $flux_{k9}$ ) (Table S10). The predominantly high  
381  $flux_{k3}$  and  $flux_{k4}$  explain why the open and closed KEAP1-NRF2 complexes in Model 1 behave in  
382 an equilibrium mode of operation. To convert it to a cycle mode, we reduced the parameter  
383 values of  $k_3$  and  $k_4$ . When  $k_4$  is reduced to about  $1.96E-4$  S<sup>-1</sup> or lower (simultaneously reducing  $k_3$   
384 to keep the open:closed ratio at 1:1 at the basal condition), the behaviors of  $KEAP1\_NRF2_{open}$   
385 and  $KEAP1\_NRF2_{closed}$  start to separate appreciably. As detailed in Table S1 footnote, Model 2  
386 was finally configured with  $k_4=1.0E-4$  as the default value and  $k_0$ ,  $k_3$  and  $k_6$  adjusted accordingly  
387 to maintain the same basal  $NRF2_{tot}$  level and half-life as Model 1. As a result, the basal  $flux_{k3} =$   
388  $0.135$ ,  $flux_{k4} = 7.35E-3$ , and  $flux_{k6} = 0.128$  nM/S approximately (Table S10), indicating that the  
389 majority of NRF2 moving from the open to closed state through the  $k_3$  step is degraded within  
390  $KEAP1\_NRF2_{closed}$  through the  $k_6$  step, and only a small fraction (5.5%) returns to the open state  
391 through the  $k_4$  step.

392

393 Fig. 3A shows the behaviors of NRF2 species decaying from the basal steady state when  
394 setting  $k_0=0$ . While the half-life of  $NRF2_{tot}$  is still 10 min, the levels of  $KEAP1\_NRF2_{open}$  and  
395  $KEAP1\_NRF2_{closed}$  diverge quickly with the open state decaying much faster than the closed  
396 state. By 15 min the open:closed ratio is about 1:2.7, comparable to what was observed in  
397 HEK293 cells treated with cycloheximide (Baird et al. 2013). By setting  $k_4$  to lower values than  
398 the default and in the extreme case  $k_4=0$  such that the binding between KEAP1 and DLG

399 becomes irreversible (and  $k_0$ ,  $k_3$  and  $k_6$  were adjusted accordingly as above), the divergent  
400 behaviors of  $KEAP1\_NRF2_{open}$  and  $KEAP1\_NRF2_{closed}$  are similar to Fig. 3A (simulation results  
401 not shown).

402

403 To examine the basic behavior of the model when NRF2 in  $KEAP1\_NRF2_{closed}$  is  
404 stabilized,  $k_6$  was lowered to different values, while keeping  $CLASS_{i-v}=0$ . As  $k_6$  decreases from  
405 the default  $1.74E-3\ S^{-1}$  (equivalent  $t_{1/2}=5.7\ min$ ) to  $1.454E-4$  (which is the default value of  $k'_6$ ,  
406 equivalent  $t_{1/2}=79\ min$ ), all NRF2 species reach steady states in about 400 min (Fig. 3B).  
407  $KEAP1\_NRF2_{open}$  and  $KEAP1\_NRF2_{closed}$  quickly diverge with  $KEAP1\_NRF2_{closed}$  increasing and  
408 reaching the steady state in about 100 min, while  $KEAP1\_NRF2_{open}$  initially increases slightly but  
409 then decreases to a level slightly lower than the basal level. The open:closed ratio decreases  
410 and reaches about 1:4.6 at 1 h, concordant with what was observed experimentally in HEK293  
411 cells treated with proteasomal inhibitor MG132 or chemical stressors such as sulforaphane and  
412 sulfoxythiocarbamate alkyne (Baird et al. 2013).  $NRF2_{tot}$  increases from 150 to 750 nM, while  
413  $NRF2_{free}$  increases by a much greater fold, from 2 to 223 nM. At this activated state, by setting  
414  $k_0=0$ , all NRF2 species degraded, with a half-life of 68.5 min for  $NRF2_{tot}$ , while  $NRF2_{free}$  seems to  
415 disappear much more quickly approaching the zero level within 1 h (Fig. 3B). By setting  $k_6$  to  
416 even lower values, the maximal levels of both  $NRF2_{free}$  and  $NRF2_{tot}$  increase but to a limited  
417 extent and the half-life of  $NRF2_{tot}$  lengthens to 191 min in the extreme case when  $k_6=0$  (Figs. S2A  
418 and S2C). Interestingly, the decay of  $NRF2_{tot}$  starts to become biphasic. The first fast phase is  
419 due to rapid  $NRF2_{free}$  drop, and the second slow phase follows the decay of  $KEAP1\_NRF2_{closed}$ .

420

421 We next examined the dynamical responses of Model 2 to a range of  $CLASS_{i-v}$  levels.  
422  $NRF2_{tot}$  increases to higher steady-state levels with increasing  $CLASS_{i-v}$  levels, and the time it  
423 takes to reach steady states also increases (Fig. 3C), which is concordant with the lengthening of  
424 the half-life as more NRF2 is diverted to the more stable, closed state complex. In comparison,

425 there is a considerable delay in the response of  $NRF2_{free}$ , which does not rise tangibly above the  
426 basal level until after 60 min (Fig. 3D). After the initial delay, the rising time of  $NRF2_{free}$  becomes  
427 shorter with higher  $CLASS_{i-v}$  levels. The initial delay is caused by the sequestration of newly  
428 synthesized NRF2 by *free KEAP1 dimer* ( $KEAP1_{free}$ ), the level of which decreases quickly as it  
429 forms complexes with NRF2 (Fig. 3E).

430

431 The steady-state  $NRF2_{free}$  level exhibits an ultrasensitive response with respect to  
432  $CLASS_{i-v}$  levels, with  $n_H$  of 2.62 and  $LRC_{max}$  of 3.09 (Fig. 3F). Interestingly, unlike steady-state  
433  $KEAP1\_NRF2_{closed\_tot}$  ( $KEAP1\_NRF2_{closed} + KEAP1_o\_NRF2_{closed}$ ) which increases monotonically  
434 with  $CLASS_{i-v}$  levels, steady-state  $KEAP1\_NRF2_{open\_tot}$  ( $KEAP1\_NRF2_{open} + KEAP1_o\_NRF2_{open}$ )  
435 exhibits a nonmonotonic dose-response profile (Fig. 3F, green line). The peak coincides with the  
436 juncture of KEAP1 saturation at which point  $KEAP1_{free}$  is nearly depleted and  $NRF2_{free}$  increases  
437 sharply. The decrease in  $KEAP1\_NRF2_{open\_tot}$  at higher  $CLASS_{i-v}$  levels is due to increasing  $flux_{k5}$   
438 associated with increasing  $NRF2_{free}$ , which takes away from the net flux toward the KEAP1-NRF2  
439 complexes (Table S11). When  $k'_6$  is set to lower values, the degree of  $NRF2_{free}$  ultrasensitivity is  
440 enhanced slightly, due to higher maximal  $NRF2_{tot}$  and  $NRF2_{free}$  levels that can be achieved (Figs.  
441 S2B and S2D), and the opposite occurs when  $k'_6$  is high (Fig. S2F).

442

443 To analyze the mechanism of ultrasensitivity, we conducted flux analysis by artificially  
444 clamping  $NRF2_{free}$  to different levels.  $flux_{k5}$  increases linearly with the clamped  $NRF2_{free}$  level,  
445 while  $flux_{k9}$  and  $flux_{k6}$  also increase but become saturated eventually because of the depletion of  
446 free KEAP1 dimer (Figs. 3G and 3H). The *total degradation rate* ( $flux_{k5} + flux_{k6} + flux_{k9}$ ) exhibits  
447 an S-shape containing 3 phases. The initial rising phase is dominated by  $flux_{k6}$  because  $k_6$  is the  
448 highest compared with  $k_5$  and  $k_9$  and the closed state is higher in concentration. The second  
449 phase is slowly rising and nearly flat because of saturation of  $flux_{k6}$  and to a small extent of  $flux_{k9}$ .  
450 The flatness of this second phase represents zero-order degradation, i.e., the *total degradation*

451 rate is insensitive to changes in NRF2 levels. In the third phase, the *total degradation rate* rises  
452 again, because  $flux_{k_5}$  now becomes dominant. The intersection point between the *total*  
453 *degradation rate* and NRF2 *synthesis rate* ( $flux_{k_0}$ ) represents the steady state of  $NRF2_{free}$ . When  
454  $k_6=5.22E-4$  (30% of default value) to mimic a mild stress condition, the intersection point appears  
455 at the junction of the first and second phases and the corresponding  $NRF2_{free}$  is about 4 nM (Fig.  
456 3G). When  $k_6$  is lowered further to  $1.74E-4$  (10% of default) to mimic a more severe stress  
457 condition, the  $flux_{k_6}$  curve shifts to lower levels and as a result the second, flat phase of *total*  
458 *degradation rate* shifts downward as well (Fig. 3H). The intersection point between *total*  
459 *degradation rate* and NRF2 *synthesis rate* swings dramatically to the right, at the junction of the  
460 second and third phase, resulting in a much higher steady-state level of  $NRF2_{free}$  at 175 nM.  
461 Therefore, a remarkable signal amplification is evident here – as  $k_6$  decreases by only 3-fold  
462 (from 30% to 10% of default value),  $NRF2_{free}$  increases by 43-fold. In the meantime, the  
463 steady-state  $NRF2_{tot}$  exhibits no ultrasensitivity, as it increases from 326 to 701 nM, a 2.2-fold  
464 change only.

465

### 466 **Model 3a (Two-Step ETGE-Binding Cycle Mode for Class I-V activator)**

467 While the dynamic behavior of Model 2 is concordant with the cycle mode of operation by  
468 exhibiting divergent behaviors of the open and closed KEAP1-NRF2 complexes (Fig. 3A and 3B),  
469 it was achieved by setting  $k_4$ , the dissociation rate constant for DLG binding, to a value that is  
470 hundreds-fold lower than experimentally measured (Fukutomi et al. 2014). In the same study, it  
471 was also demonstrated that the first binding event, i.e., between KEAP1 and the ETGE motif of  
472 NRF2, is a thermodynamically two-step process, involving an initial fast binding step to form a  
473 transient, intermediate complex (termed  $KEAP1\_NRF2_{open1}$  here) first, followed by a much slower  
474 second step that leads to a more stable configuration of the open complex (termed  
475  $KEAP1\_NRF2_{open2}$  here). We hypothesized that this second, slow ETGE binding step, rather than  
476 DLG binding, may account for the cycle mode of operation. To test this possibility, in Model 3a we

477 added an extra, reversible step,  $k_{1,1}$  and  $k_{2,1}$ , to account for the intramolecular state transition  
478 between  $KEAP1\_NRF2_{open1}$  and  $KEAP1\_NRF2_{open2}$  (Fig. 4A), with  $k_4$  restored to the high value  
479 measured in (Fukutomi et al. 2014). As detailed in Table S1 footnote, we then iteratively adjusted  
480 the values of  $k_0$ ,  $k_3$  and  $k_6$  such that the basal  $NRF2_{tot}$  level is still at 150 nM and half-life at 10  
481 min, and the open ( $KEAP1\_NRF2_{open} = KEAP1\_NRF2_{open1} + KEAP1\_NRF2_{open2}$ ):closed  
482 ( $KEAP1\_NRF2_{closed}$ ) state ratio remains at 1:1 (Fig. 4B).  $NRF2$  in  $KEAP1\_NRF2_{open1}$  and  
483  $KEAP1\_NRF2_{open2}$  was assumed to degrade at the same rate ( $k_9=k_{9,1}=k_5$ ).

484  
485 At the basal condition, with the default parameter setting of Model 3a, the second step of  
486 ETGE binding ( $k_{1,2}$  and  $k_{2,1}$ ) does not operate in equilibrium mode. This is because  $flux_{k_{1,1}} = 0.133$   
487 and  $flux_{k_{2,1}} = 1.73E-3$  nM/S, thus only a tiny fraction of  $KEAP1\_NRF2_{open2}$  is returned to  
488  $KEAP1\_NRF2_{open1}$  (Table S10). Another small fraction is degraded through  $flux_{k_{9,1}}$  at  $4.1E-3$   
489 nM/S. Over 95% of  $KEAP1\_NRF2_{open2}$  is moved forward to become  $KEAP1\_NRF2_{closed}$  at a net  
490 flux ( $flux_{k_3} - flux_{k_4}$ ) of 0.127 nM/S. In contrast, both the first step of ETGE binding ( $k_1$  and  $k_2$ ) and  
491 the step of DLG binding ( $k_3$  and  $k_4$ ) operate in equilibrium mode, with  $flux_{k_1}$  and  $flux_{k_2}$  at 16.48  
492 and 16.33 nM/S respectively, and  $flux_{k_3}$  and  $flux_{k_4}$  at 14.19 and 14.07 nM/S respectively, all of  
493 which are >100 fold higher than other connected turnover fluxes (Table S10). As a result, the  
494  $NRF2_{free}:KEAP1\_NRF2_{open1}$  ratio, which is 1:9.4, is largely determined by the  $k_2:(2*k_1*Keap1_{free})$   
495 ratio, and the  $KEAP1\_NRF2_{open2}:KEAP1\_NRF2_{closed}$  ratio, which is 1:5, is largely determined by  
496 the  $k_4:k_3$  ratio. At 58 and 14 nM respectively,  $KEAP1\_NRF2_{open1}$  dominates  $KEAP1\_NRF2_{open2}$ ,  
497 accounting for 80% of the total open KEAP1-NRF2 complex (Fig. 4B and Table S8).

498  
499 When setting  $k_0=0$  to examine the decay of NRF2 species from their basal steady states,  
500  $NRF2_{free}:KEAP1\_NRF2_{open1}$  and  $KEAP1\_NRF2_{open2}:KEAP1\_NRF2_{closed}$  remain at the same  
501 equilibrium ratios as above as all NRF2 species decrease (Fig. 4B).  $NRF2_{free}$  and  
502  $KEAP1\_NRF2_{open1}$  decrease quickly with a half-life of about 4-5 min, due primarily to the

503 depletion of  $KEAP1\_NRF2_{open1}$  through  $flux_{k1.1}$ , which is about 8-fold greater than  $flux_{k9}$ . In  
504 contrast,  $KEAP1\_NRF2_{open2}$  and of  $KEAP1\_NRF2_{closed}$  do not decrease as fast because of the  
505 continued supply of KEAP1-NRF2 complex through  $flux_{k1.1}$ . Because of the differential decay  
506 rates, the relative abundance of  $KEAP1\_NRF2_{open1}$  and  $KEAP1\_NRF2_{open2}$  switches positions  
507 over time, with  $KEAP1\_NRF2_{open2}$  becoming the dominant form of the open KEAP1-NRF2  
508 complex eventually. Furthermore, the levels of  $KEAP1\_NRF2_{open}$  and  $KEAP1\_NRF2_{closed}$  diverge  
509 quickly from the basal ratio of 1:1 to 1:2.5 by 15 min, and to about 1:4.5 eventually. Since toward  
510 the end of the decay process  $KEAP1\_NRF2_{open2}$  is the dominant form of the open KEAP1-NRF2  
511 complex, this 1:4.5 ratio closely reflects the equilibrium ratio of  
512  $KEAP1\_NRF2_{open2}:KEAP1\_NRF2_{closed}$ , which is determined primarily by the  $k_4:k_3$  ratio.

513

514 To examine the behavior of Model 3a when NRF2 in  $KEAP1\_NRF2_{closed}$  is stabilized, we  
515 first lowered  $k_6$  to different values, while keeping  $CLASS_{i-v}=0$ . As  $k_6$  decreases from the default  
516  $1.775E-3 S^{-1}$  (equivalent  $t_{1/2}=6.5$  min) to  $1.252E-4$  (which is the default value of  $k'_6$ , equivalent  
517  $t_{1/2}=92$  min), all NRF2 species (except  $KEAP1\_NRF2_{open1}$ ) increase and reach steady states in  
518 about 400 min (Fig. 4C). The open:closed ratio decreases and reaches about 1:2.8 at 1 h, and  
519 settles to 1:3.5 at steady state, with  $KEAP1\_NRF2_{open2}$  switching to the dominant form of the  
520 open-state complex. When reaching steady states,  $NRF2_{tot}$  increases by 5-fold, while  $NRF2_{free}$   
521 increases by a much greater fold, from 6.2 to 227 nM (36.6-fold). At this activated state, by  
522 setting  $k_0=0$ , all NRF2 species decrease, with a half-life of 68 min for  $NRF2_{tot}$ , while  $NRF2_{free}$   
523 disappears much more quickly. By setting  $k_6$  to even lower values, the maximal levels of both  
524  $NRF2_{free}$  and  $NRF2_{tot}$  increase but to a limited extent and the half-life of  $NRF2_{tot}$  lengthens to 126  
525 min in the extreme case when  $k_6=0$ . (Figs. S3A and S3C).

526

527 Therefore, at the basal condition,  $KEAP1\_NRF2_{open1}$  is the dominant form of the open  
528 KEAP1-NRF2 complex. However, upon perturbation, either by setting  $k_0=0$  or setting  $k_6$  to a

529 lower value than the default, the relative abundance between the two open states is switched,  
530 such that  $KEAP1\_NRF2_{open2}$  becomes dominant, and then the open:closed ratio will be following  
531 the  $KEAP1\_NRF2_{open2}:KEAP1\_NRF2_{closed}$  ratio, which is determined largely by  $k_3$  and  $k_4$  as an  
532 equilibrium step. In this sense, although Model 3a behaves as shown above in a cycle mode  
533 globally due to the slow  $k_{1.1}/k_{2.1}$  steps, locally, some species of the KEAP1-NRF2 complexes still  
534 maintain an equilibrium relationship, due to the high fluxes of the  $k_1/k_2$  and  $k_3/k_4$  binding steps.

535

536 With increasing  $CLASS_{I-V}$  levels, the temporal behaviors of  $NRF2_{tot}$  (Fig. 4D),  $NRF2_{free}$   
537 (Fig. 4E), and  $KEAP1_{free}$  (Fig. 4F) are similar to Model 2. It takes a longer time for  $NRF2_{tot}$  to  
538 reach steady states, while the  $NRF2_{free}$  response is initially delayed but its rising time is  
539 shortened with increasing  $CLASS_{I-V}$  levels. For steady-state dose-response relationships,  
540  $KEAP1\_NRF2_{open2\_tot}$  ( $KEAP1\_NRF2_{open2} + KEAP1_o\_NRF2_{open2}$ ) and  $KEAP1\_NRF2_{closed\_tot}$   
541 ( $KEAP1\_NRF2_{closed} + KEAP1_o\_NRF2_{closed}$ ) both increase while remaining at a constant  
542 equilibrium ratio with increasing  $CLASS_{I-V}$  levels (Fig. 4G). In contrast, steady-state  
543  $KEAP1\_NRF2_{open1\_tot}$  ( $KEAP1\_NRF2_{open1} + KEAP1_o\_NRF2_{open1}$ ) first increases slightly then  
544 decreases (Fig. 4G). Steady-state  $NRF2_{free}$  exhibits an ultrasensitive, sigmoidal dose-response  
545 with respect to  $CLASS_{I-V}$  levels, with  $n_H$  of 1.78 and  $LRC_{max}$  of 2.24 (Fig. 4G).

546

547 Flux analysis shows that the *total degradation rate* curve exhibits an S-shape as in Model  
548 2 (Figs. 4H and 4I). However, because of the two-step ETGE binding, higher concentrations of  
549  $NRF2_{free}$  are required to produce levels of turnover fluxes similar to Model 2, with the  $flux_{k_6}$  and  
550  $flux_{k_9}$  curves shifted to the right and closer to  $flux_{k_5}$ . This shift leads to a shorter second phase of  
551 the *total degradation rate* curve that is not as flat as in Model 2. As the  $k_6$  value is varied  
552 mimicking different stress levels, the intersection point between *synthesis rate* and *total*  
553 *degradation rate* curves still swings quite dramatically, albeit not as dramatic as in Model 2 (Figs.  
554 3G and 3H). As shown in Figs. 4H and 4I, when  $k_6$  is lowered from 5.325E-4 to 1.775E-4, a 3-fold

555 decrease, the corresponding steady-state  $NRF2_{free}$  concentration increases by 13-fold, indicating  
556 signal amplification.

557

#### 558 *Effects of $k_1$ ( $k'_1$ ) and $k_2$ ( $k'_2$ )*

559 We next examined the effects of different parameters on the NRF2 response in Model 3a.  
560 Enhancing the ETGE-mediated first-step binding affinity between free KEAP1 and free NRF2, by  
561 increasing  $k_1$  and  $k'_1$  by 10-fold, only marginally decreases the basal  $NRF2_{tot}$  level and half-life  
562 (Fig. S4A) with nearly no effect on the steady-state dose-response curve (Fig. 5A). Neither the  
563 basal levels of different open and closed KEAP1-NRF2 complexes nor their steady-state  
564 dose-response curves are affected (Figs. S4E-S4H). In contrast, the basal  $NRF2_{free}$  level  
565 decreases dramatically and the ultrasensitivity of the dose-response curve is enhanced markedly  
566 without much change in the maximal level (Fig. 5B). Decreasing  $k_1$  and  $k'_1$  by 10-fold appears to  
567 have slightly larger albeit opposite effects on the various NRF2 species (Figs. 5A and S4), and  
568 dramatically increases the  $NRF2_{free}$  level and reduces its ultrasensitivity (Fig. 5B). The time delay  
569 in the  $NRF2_{free}$  response disappears with decreasing  $k_1$  and  $k'_1$  (Fig. S4C) and is further  
570 increased with increasing  $k_1$  and  $k'_1$  (Fig. S4D). Varying  $k_2$  and  $k'_2$  has opposite effects as varying  
571  $k_1$  and  $k'_1$  (simulation results not shown).

572

#### 573 *Effects of $k_{1,1}$ ( $k'_{1,1}$ ) and $k_{2,1}$ ( $k'_{2,1}$ )*

574 We next examined the effects of the ETGE-mediated second-step binding, which is much slower  
575 than the first step and is the key step for making Model 3a behave in a cycle mode. Increasing  
576  $k_{1,1}$  and  $k'_{1,1}$  shifts the balance between the two open states, causing a reduction in  
577  $KEAP1\_NRF2_{open1\_tot}$  (Fig. S5E) but only a slight increase in  $KEAP1\_NRF2_{open2\_tot}$  (Fig. S5F) and  
578  $KEAP1\_NRF2_{closed\_tot}$  (Fig. S5H), resulting in a net decrease of the total open state  
579  $KEAP1\_NRF2_{open\_tot}$  (Fig. S5G). As a result, the basal level of  $NRF2_{tot}$  is reduced with a slight  
580 decrease in its half-life (Fig. S5A) and the steady-state dose-response curve becomes steeper



581 (Fig. 5C). In comparison, the basal level of  $NRF2_{free}$  is considerably reduced and the  
582 ultrasensitivity of the dose-response curve is dramatically enhanced with little change in the  
583 maximal response level (Fig. 5D). Decreasing  $k_{1,1}$  and  $k'_{1,1}$  has the opposite but generally larger  
584 effects. It causes an increase in  $KEAP1\_NRF2_{open1\_tot}$  (Fig. S5E) and a decrease in  
585  $KEAP1\_NRF2_{open2}$  (Fig. S5F) and  $KEAP1\_NRF2_{closed}$  (Fig. S5H), resulting in a net increase of  
586  $KEAP1\_NRF2_{open\_tot}$  which seems to have a flat response to  $CLASS_{i-v}$  (Fig. S5G). As  $k_{1,1}$  and  $k'_{1,1}$   
587 are decreased by 10-fold, the basal level of  $NRF2_{tot}$  is dramatically increased with its half-life  
588 lengthened (Fig. S5A) and the steady-state dose-response curve becomes much shallower (Fig.  
589 5C). The basal level of  $NRF2_{free}$  is considerably elevated and the ultrasensitivity of its  
590 dose-response curve is dramatically reduced (Fig. 5D). The time delay in the  $NRF2_{free}$  response  
591 disappears with decreasing  $k_{1,1}$  and  $k'_{1,1}$  (Fig. S5C) and is further increased with increasing  $k_{1,1}$   
592 and  $k'_{1,1}$  (Fig. S5D). Varying  $k_{2,1}$  and  $k'_{2,1}$ , especially when lowering the values, seems to affect  
593  $KEAP1\_NRF2_{open1\_tot}$  the most, with a minimal effect on all other NRF2 species (Figs. 5E-5F and  
594 S5I-S5P), which is consistent with the low backward flux nature of this second-step ETGE  
595 binding, where the backward flux ( $flux_{k_{2,1}} + flux_{k'_{2,1}}$ ) is only a tiny fraction of the forward flux  
596 ( $flux_{k_{1,1}} + flux_{k'_{1,1}}$ ).

597

#### 598 *Effects of $k_3$ ( $k'_3$ ) and $k_4$ ( $k'_4$ )*

599 We next examined the effects of DLG-mediated binding. Increasing  $k_3$  and  $k'_3$  by 10-fold reduces  
600 the  $KEAP1\_NRF2_{open2\_tot}$  level dramatically across the range of  $CLASS_{i-v}$  levels as expected (Fig.  
601 S6F). However, it only marginally decreases the basal  $KEAP1\_NRF2_{open1\_tot}$  (Fig. S6E) and  
602 increases the basal  $KEAP1\_NRF2_{closed\_tot}$  (Fig. S6H) levels. At high  $CLASS_{i-v}$  levels,  
603  $KEAP1\_NRF2_{open1\_tot}$  is suppressed considerably and  $KEAP1\_NRF2_{closed\_tot}$  increases to higher  
604 levels. These changes have slight effects on the basal  $NRF2_{tot}$  level and its half-life (Fig. S6A),  
605 and the steady-state dose-response curve (Fig. 5G). The basal  $NRF2_{free}$  level decreases  
606 marginally and the ultrasensitivity of the steady-state dose-response curve barely increases with

607 a slightly higher maximal level (Fig. 5H). Decreasing  $k_3$  and  $k'_3$  by 10-fold has opposite but larger  
608 effects on the various species. With  $KEAP1\_NRF2_{open2\_tot}$  at higher levels (Fig. S6F),  
609  $KEAP1\_NRF2_{open1\_tot}$  (Fig. S6E) becomes higher and  $KEAP1\_NRF2_{closed\_tot}$  (Fig. S6H) becomes  
610 lower. Both basal  $NRF2_{tot}$  and  $NRF2_{free}$  levels increase and maximal response levels decrease,  
611 reducing their ultrasensitivity (Figs. 5G and 5H). The time delay in the  $NRF2_{free}$  response does  
612 not appear to be affected by  $k_3$  and  $k'_3$  (Figs. S6B-S6D). Varying  $k_4$  and  $k'_4$  has opposite effects  
613 as varying  $k_3$  and  $k'_3$ , and reducing  $k_4$  and  $k'_4$  to zero thus making the DGL-mediated binding  
614 irreversible has a similar effect as reducing  $k_4$  and  $k'_4$  by 10-fold (simulation results not shown).

615

#### 616 *Effects of hinge-latch mode of operation*

617 The hinge-latch hypothesis states that under oxidative stress by class I-V oxidants, the  
618 DLG-mediated binding is weakened, likely due to the cysteine modification on KEAP1 in multiple  
619 domains, and the level of the closed KEAP1-NRF2 complex is reduced so that NRF2 is no longer  
620 destabilized (Tong et al. 2006, Tong et al. 2007, Fukutomi et al. 2014). Here we used Model 3a to  
621 explore the effects of the hinge-latch hypothesis. When setting  $k'_3$  (which is the association rate  
622 constant for the intramolecular binding between oxidized KEAP1 and DLG motif) to a lower value  
623 (0.1 of default) to mimic a hinge-latch mode of operation, a high  $CLASS_{I-V}$  level lead to increases  
624 in both the open and closed states (Figs. 6A and 6B). However, the open state level is higher  
625 than the closed state, which runs counter to the decreasing open:closed ratio under oxidative  
626 stress as expected (Baird et al. 2013). The hinge-latch simulation also predicts more muted  
627 maximal responses of  $NRF2_{tot}$  (Fig. 6E) and  $NRF2_{free}$  (Fig. 6F). Interestingly, increasing  $k'_3$  to  
628 simulate strengthened DLG binding under oxidative stress has the opposite effect: the  
629 open:closed ratio further increases (Figs. 6C and 6D) and the  $NRF2_{tot}$  (Fig. 6E) and  $NRF2_{free}$  (Fig.  
630 6F) dose-responses exhibit higher maximal levels and enhanced ultrasensitivity, although these  
631 changes approach a limit as  $k'_3$  is increased by  $> 10$ -fold. Changing the DLG binding affinity by  
632 varying  $k'_4$  has opposite effects as varying  $k'_3$  (simulation results not shown). Therefore, with

633 current parameter settings, , the hinge-latch mode of operation is predicted to be less effective in  
634 activating NRF2 by class I-V compounds.

635

### 636 *Effects of KEAP1 abundance*

637 The relative abundance of KEAP1 and NRF2 can have important effects on NRF2 activation.  
638 The current default basal  $NRF2_{tot}:KEAP1_{tot}$  ratio is about 1:4. Increasing  $KEAP1_{tot}$  by up to  
639 10-fold has little effect on the basal  $NRF2_{tot}$  level and its half-life (Fig. S8A). This lack of effect is  
640 because at the default  $KEAP1_{tot}$  level, there is already sufficient KEAP1 to sequester the majority  
641 of NRF2, so increasing  $KEAP1_{tot}$  further does not alter the fraction of NRF2 in complex with  
642 KEAP1 much, including the closed state which is most actively degraded. But the maximal level  
643 of the dose-response curve of  $NRF2_{tot}$  increases (Fig. 7A) and this occurs because NRF2 in  
644  $KEAP1_o-NRF2_{closed}$  is not degraded as readily as  $NRF2_{free}$  or NRF2 in the open state. Increasing  
645 total KEAP1 abundance reduces basal  $NRF2_{free}$  and the maximal response levels dramatically  
646 (Fig. 7B). The muted response is mostly due to the increased sequestering effect of higher  
647 KEAP1 abundance. When  $KEAP1_{tot}$  is reduced from its default value, basal  $NRF2_{tot}$  levels and its  
648 half-life increase (Fig. S8A), and the dose-response curve becomes shallower with lower  
649 maximal response levels (Fig. 7A). Basal  $NRF2_{free}$  increases dramatically with little further  
650 increase in response to  $CLASS_{I-V}$  at higher levels, indicating constitutive activation of NRF2 (Fig.  
651 7B). These results suggest that there is an optimal NRF2:KEAP1 ratio that can maximize the  
652 dynamic range of free NRF2 in response to oxidative stress. If the ratio is too low or too high, the  
653 response of free NRF2 is muted.

654

### 655 **Model 3b (Two-Step ETGE-Binding Cycle Mode for Class VI inducer)**

656 Since Model 3a represents the most updated biology of KEAP1 and NRF2 interactions, the  
657 remaining Models (3b, 4a and 4b) are based on this model. In Model 3b, we simulated class VI  
658 NRF2 activators, which activate NRF2 by competing with NRF2 for binding to the DC domain of

659 KEAP1 (Hancock et al. 2012, Jiang et al. 2014, Lazzara et al. 2020). Model 3b keeps the  
660 interactions between KEAP1 and NRF2 at the basal condition as in Model 3a, but differ in how  
661  $CLASS_{VI}$  interacts with KEAP1 (Fig. 8A). We assume that a  $CLASS_{VI}$  molecule can bind equally  
662 to either of the two monomeric subunits in KEAP1 dimer that is not occupied by NRF2. It is thus  
663 possible that a KEAP1 dimer can be occupied by 2 molecules of a  $CLASS_{VI}$  compound such that  
664 no NRF2 is able to bind to this KEAP1 dimer. This assumption is well justified as It has been  
665 recently demonstrated that NRF2 can be progressively and ultimately completely liberated off  
666 KEAP1 by increasing concentrations of p62 and other KEAP1-NRF2 interaction inhibitors (Horie  
667 et al. 2021). Unlike the case with  $CLASS_{I-V}$  activators, in response to  $CLASS_{VI}$ ,  $NRF2_{free}$   
668 increases immediately without delay, followed by a slower rise over time to reach the steady  
669 state in about 300 min (Fig. 8C). The initial rapid response of  $NRF2_{free}$  is due to the titration of  
670 KEAP1 by  $CLASS_{VI}$ , resulting in immediate liberation of NRF2 from the KEAP1-NRF2 complexes.  
671 The subsequent slow  $NRF2_{free}$  rise occurs because more KEAP1-NRF2 complex shifts away  
672 from the rapidly-degrading closed state, resulting in NRF2 stabilization (Fig. 8E). Contrary to  
673 Model 3a for  $CLASS_{I-V}$ , the higher the  $CLASS_{VI}$  level, the long it takes for  $NRF2_{free}$  to reach the  
674 steady state (Fig. 8C).  $NRF2_{tot}$  has a similar temporal profile to  $NRF2_{free}$  except the initial  
675 fast-rising phase (Fig. 8B). The steady-state dose responses of  $NRF2_{free}$  and  $NRF2_{tot}$  are shown  
676 in Fig. 8D, with  $NRF2_{free}$  exhibiting an  $n_H$  of 1.09 and  $LRC_{max}$  of 0.92. The  $NRF2_{free}$  and  $NRF2_{tot}$   
677 responses to low  $CLASS_{VI}$  levels are nearly flat, as  $CLASS_{VI}$  molecules are first sequestered by  
678 free KEAP1. Contrary to the decreasing open:closed ratio of KEAP1-NRF2 complexes under  
679  $CLASS_{I-V}$ , this ratio increases by  $CLASS_{VI}$  (Fig. 8E). At high  $CLASS_{VI}$  levels, the half-life of  
680  $NRF2_{tot}$  approaches 40 min, which is also the half-lives of  $NRF2_{free}$  and  $KEAP1\_NRF2_{open\_tot}$  (Fig.  
681 S9). We also explored the situation when only one KEAP1 monomeric subunit can be occupied  
682 by class VI activators by setting both  $k'_7$  and  $k'_8$  to zero. As shown in Figs. 8F and 8G, this  
683 configuration does not affect  $NRF2_{tot}$ , but weakens the  $NRF2_{free}$  response as its maximal level  
684 cannot reach as high as when both KEAP1 monomeric subunits can be occupied by class VI

685 activators. This more muted response is because without class VI activators blocking both  
686 binding sites on KEAP1 dimer, NRF2 can still be sequestered by KEAP1 through the ETGE motif,  
687 resulting in lower  $NRF2_{free}$  levels.

688

#### 689 **Model 4a (With Nucleus for Class I-V activators)**

690 Since NRF2 that translocates to the nucleus is what ultimately drives target gene expression, we  
691 next explored the situation when a nuclear compartment is added. The following assumptions  
692 were made regarding NRF2 translocation between the cytosol and nucleus (Fig. 9A). (i) The  
693 binding kinetics between free nuclear NRF2 ( $NRF2_{free\_nucleus}$ ) and free nuclear KEAP1 dimer  
694 ( $KEAP1_{free\_nucleus}$ ) are the same as in the cytosol. (ii) KEAP1-mediated NRF2 ubiquitination and  
695 degradation does not occur in the nucleus. Therefore, the degradation rate constants of various  
696 NRF2 species in the nucleus are the same as in the cytosol, except for the closed KEAP1-NRF2  
697 complex, which is degraded with the same rate constant as other NRF2 species. (iii) NRF2  
698 activators do not modify or bind to KEAP1 in the nucleus to regulate NRF2 stability.

699

700 At the basal condition, total nuclear NRF2 ( $NRF2_{tot\_nucleus}$ ) is at 278 nM as observed in  
701 RAW 264.7 cells (Iso et al. 2016) and a significant fraction of which is titrated by KEAP1 such  
702 that  $NRF2_{free\_nucleus}$  is at 180 nM (Table S8). When setting  $k_0=0$ ,  $NRF2_{tot\_cytosol}$ ,  $NRF2_{tot\_nucleus}$ , and  
703  $NRF2_{tot\_cell}$  all decay but at different paces, with corresponding half-lives of about 11, 28, 18 min,  
704 respectively (Fig. 9B). When viewed on log scale, it is apparent that  $NRF2_{tot\_cell}$  decays in two  
705 phases, a fast phase followed by a slow one (Fig. 9C). This two-phase decay profile of total  
706 cellular NRF2 is caused by the fast cytosolic and slow nuclear decay and has been observed  
707 experimentally in a variety of cell lines (Khalil et al. 2015). Under high stress when  $CLASS_{I-V} = 1000$   
708 nM, the half-life of  $NRF2_{tot\_cell}$  markedly lengthens to 55 min (Fig. 9D). In response to a range of  
709  $CLASS_{I-V}$  levels, free and total NRF2 in both cytosol and nucleus rise and reach steady states in  
710 about 300 min (Fig. S10). In contrast to Model 3a which does not have the nucleus compartment,

711  $NRF2_{free\_cytosol}$  rises to much lower levels (Fig. S10A) as most of it translocates into the nucleus  
712 elevating  $NRF2_{free\_nucleus}$  (Fig. S10C). The steady-state dose-response relationship for  
713  $NRF2_{free\_nucleus}$  exhibits a shallow response, with  $n_H$  of 1.15 and of  $LRC_{max}$  of 0.31 (Fig. 9E). The  
714 maximal response levels of  $NRF2_{tot\_nucleus}$  and  $NRF2_{free\_nucleus}$  increase by 2.6 and 3.5-fold  
715 respectively, while those of  $NRF2_{tot\_cytosol}$  and  $NRF2_{free\_cytosol}$  both increase by about 3.2 and  
716 3.1-fold, respectively (Tables S8 and S9). Thus, with a nuclear load, NRF2 activation is not as  
717 robust as when the action is limited to the cytosol only. This lessor response contrasts with the  
718 nearly 10-fold increase in nuclear NRF2 under exposure to DEM at 100  $\mu$ M for 3 h observed in  
719 RAW 264.7 cells which our model is partially based upon (Iso et al. 2016).

720

721 The overall muted response of Model 4a is due to the following reasons. At the basal  
722 condition, the net influx of NRF2 from the cytosol to nucleus is  $flux_{k10} - flux_{k11} = 0.0434$  nM/s,  
723 which is about 22% of  $k_0$  (0.1933), the NRF2 synthesis rate in the cytosol. Therefore, even if a  
724  $CLASS_{i-v}$  activator can divert all synthesized NRF2 into the nucleus, the total nuclear NRF2 can  
725 only increase by a maximal 4.45-fold (0.193/0.0434) with a constant nuclear NRF2 half-life. We  
726 wondered if the relative abundance of nuclear KEAP1 and NRF2 plays a role in determining the  
727 magnitude of the nuclear NRF2 response. When  $KEAP1_{tot\_nucleus}$  abundance is increased (with  
728  $k_{10}$  adjusted simultaneously to maintain the same basal  $NRF2_{tot\_cytosol}$  and  $NRF2_{tot\_nucleus}$   
729 concentrations), the simulations showed that both the basal and maximally-induced levels of  
730  $NRF2_{free\_nucleus}$  decrease because of the sequestering effect of KEAP1 (Fig. S11C). However, the  
731 degree of ultrasensitivity of the  $NRF2_{free\_nucleus}$  dose-response curve seems to be optimal when  
732  $KEAP1_{tot\_nucleus}$  is at an intermediate abundance. Increasing  $KEAP1_{tot\_nucleus}$  also leads to  
733 changes in the maximal levels of  $NRF2_{tot\_cytosol}$ ,  $NRF2_{free\_cytosol}$ , and  $NRF2_{tot\_nucleus}$  (Fig. S11), but  
734 the fold-increase of  $NRF2_{tot\_nucleus}$  remains relatively low. These results suggest that other  
735 mechanisms, as described in the Discussion, may operate *in vivo* to produce a more robust  
736 nuclear NRF2 response. One possibility is a smaller nuclear NRF2 load at the basal condition.

737 As shown in Fig. S12, when reducing the basal  $NRF2_{tot\_nucleus}$  level and thus the nuclear load  
738 through simultaneously adjusting  $k_0$  and  $k_{10}$  while maintaining the same basal  $NRF2_{tot\_cytosol}$  level,  
739 the magnitude of both  $NRF2_{tot\_nucleus}$  and  $NRF2_{free\_nucleus}$  responses improve considerably.

740

#### 741 **Model 4b (With Nucleus for Class VI activators)**

742 We next considered the situation of a class VI activator which competes with NRF2 for binding to  
743 KEAP1 in Model 4b (Fig. 10A). The model assumptions are similar to Model 4a and the class VI  
744 activator only operates in the cytosol. Model 4b has an interesting dynamic. In response to a  
745 range of  $CLASS_{VI}$  levels, there is a quick spike in  $NRF2_{free\_cytosol}$  within a couple of minutes  
746 followed by a slow rise (Fig. 10B). Correspondingly,  $NRF2_{tot\_cytosol}$  decreases immediately  
747 followed by a slower increase before setting to steady states (Fig. 10C). The rapid increase in  
748  $NRF2_{free\_cytosol}$  results from the immediate liberation of NRF2 from the KEAP1-NRF2 complex,  
749 and the liberated NRF2 moves quickly into the nucleus, causing  $NRF2_{free\_nucleus}$  (Figs. 10D) and  
750  $NRF2_{tot\_nucleus}$  to rise quickly followed by a slower increase to steady states. Under high stress  
751 when  $CLASS_{VI} = 1000$  nM, the half-life of  $NRF2_{tot\_cell}$  lengthens to 40 min (Fig. 10E), shorter than  
752 that in Model 4a. However, the steady-state  $NRF2_{free\_nucleus}$  and  $NRF2_{tot\_nucleus}$  levels can increase  
753 to higher levels, maximally by 6 and 4.2-fold from their basal levels, respectively (Tables S8 and  
754 S9). This is because by outcompeting NRF2 for KEAP1,  $CLASS_{VI}$  can drive more NRF2 into the  
755 nucleus (Fig. S10C vs. Fig. 10D). The steady-state dose-response curve  $NRF2_{free\_nucleus}$  is  
756 shallow, with  $n_H$  of 1.09 and of  $LRC_{max}$  of 0.46 (Fig. 10F). Interestingly, the steady-state  
757 dose-response curve of  $NRF2_{tot\_cytosol}$  monotonically decreases, from the basal 150 nM to 33 nM  
758 for higher levels of  $CLASS_{VI}$ . This decrease occurs because KEAP1 dimer is gradually titrated  
759 away by  $CLASS_{VI}$  activator, leaving fewer NRF2 in the KEAP1-bound form (Fig. 10G), and more  
760 NRF2 translocates to the nucleus. As in Model 4a, varying nuclear KEAP1 and lowering basal  
761 nuclear load of NRF2 turnover can also improve the magnitude and ultrasensitivity of  
762  $NRF2_{free\_nucleus}$  (Figs. S13 and S14).





764

## DISCUSSION

765 NRF2 activation is an essential step toward the transcriptional induction of adaptive antioxidant  
766 responses. It is mediated via a unique mechanism of protein stabilization where KEAP1 functions  
767 as both a redox sensor and regulator. While the molecular interactions involved in this process  
768 have been well characterized qualitatively and to some extent quantitatively, the quantitative  
769 systems-level behaviors of this redox transducer module are still poorly understood. In the  
770 present study, we explored the steady-state and dynamic behaviors of the KEAP1-NRF2  
771 interactions through a series of mathematical models of increasing complexity. Our simulations  
772 demonstrated that the kinetic details of the molecular interactions between KEAP1 and NRF2  
773 play critical roles in determining the redox signaling properties.

774

### 775 **Basal NRF2 half-life in relation to different NRF2 states**

776 A prominent function of KEAP1 is to act as an E3 ligase adaptor to promote NRF2 ubiquitination  
777 and degradation. This function is critically dependent on the configuration of the KEAP1-NRF2  
778 complex. It is well-established that for the ubiquitination and degradation of NRF2 to occur, the  
779 KEAP1-NRF2 complex has to be in the closed state, i.e., both of the two binding sites in the  
780 cysteine-unmodified KEAP1 dimer have to be engaged by the ETGE and DLG motifs of the  
781 same NRF2 molecule. Therefore, the fraction of this closed state and the rate at which NRF2  
782 within this closed KEAP1-NRF2 complex is ubiquitinated and degraded are key determinants for  
783 the half-life of NRF2 in the cytosol.

784

785 In the confine of the present model structure, NRF2 exists in three forms: free, open  
786 KEAP1-NRF2 complex, and closed KEAP1-NRF2 complex. The relative abundances of these  
787 forms at the basal steady state are determined by the binding parameters as well as the  
788 degradation rate constant of each NRF2 form. Given the high binding affinity between KEAP1  
789 and ETGE, it is expected in theory and shown by our simulation that the fraction of free cytosolic

790 NRF2 is very small, when KEAP1 is not limiting, and NRF2 exists predominantly in the complex  
791 forms at the basal condition. Using FRET to track the open and closed states of the  
792 KEAP1-NRF2 complex, Baird 2013 showed that at least in HEK293 cells, the open:closed ratio  
793 of the KEAP1-NRF2 complex is near 1:1 under nonstressed conditions (Baird et al. 2013). The  
794 half-life of total NRF2 in whole cells at basal conditions is short, mostly ranging between 6-20 min  
795 depending on cell types (Kwak et al. 2002, Alam et al. 2003, Itoh et al. 2003, Stewart et al. 2003,  
796 Kobayashi et al. 2004, He et al. 2006, Khalil et al. 2015, Crinelli et al. 2021). Since nuclear NRF2  
797 is relatively more stable than cytosolic NRF2 (Itoh et al. 2003, Burroughs et al. 2018) and often  
798 constitutes a considerable fraction of total NRF2 at the basal condition (Khalil et al. 2015, Iso et  
799 al. 2016), it is expected that cytosolic NRF2 is actually degraded at even faster rates than  
800 measured in whole cells. The comparable basal abundance of open and closed KEAP1-NRF2  
801 complexes suggests that NRF2 in the closed form has to be degraded very fast with a half-life of  
802 its own that is much shorter than the averaged half-life of total NRF2. In our models, parameter  
803  $k_6$  governs the degradation of this NRF2 form. With an apparent half-life of cytosolic total NRF2  
804 around 10 min at the basal condition, the default values of  $k_6$  across the six models correspond  
805 to an half-life of 5.7-6.6 min. In comparison, the half-lives of free NRF2 and NRF2 in the open  
806 KEAP1-NRF2 complex, as determined by parameters  $k_5$  and  $k_9$  (and  $k_{9,1}$  in the case of two-step  
807 ETGE binding) respectively, are much longer, which is 40 min here, as reported for COS-1 and  
808 HEK293T cells (McMahon et al. 2004, Rada et al. 2011). If  $k_5$ ,  $k_9$ , and  $k_{9,1}$  are set lower than the  
809 current default value,  $k_6$  needs to be even higher to maintain the same basal total NRF2 half-life.  
810 Therefore, the turnover of basal NRF2 is predominantly routed through the closed KEAP1-NRF2  
811 complex, and the apparent half-life of cytosolic total NRF2 is determined by the fraction of the  
812 closed complex. In Model 1 which operates in an equilibrium mode, this fraction remains  
813 constant at 50% at all times (Fig. 2A), therefore the instantaneous half-life of total NRF2 at any  
814 given moment is fixed. In the remaining models which operate in a cycle mode, the fraction  
815 increases dynamically and becomes dominant over other NRF2 forms during the decay process

816 (Figs. 3A and 4B), resulting in a nonlinear degradation of total NRF2 with shortening  
817 instantaneous half-life. In Models 4a and 4b, which has the nucleus compartment, cellular total  
818 NRF2 decays with a two-phase profile, which has been observed experimentally in a variety of  
819 cell types (Khalil et al. 2015), reflecting the differential half-lives of cytosolic and nuclear NRF2.

820

### 821 **Equilibrium vs cycle mode of operation**

822 The comparable abundance of the open and closed states of the KEAP1-NRF2 complex at the  
823 basal condition can be achieved in theory in two ways, depending on the transition fluxes ( $flux_{k3}$   
824 and  $flux_{k4}$ ) between the two states relative to other turnover fluxes ( $flux_{k5}$ ,  $flux_{k6}$ ,  $flux_{k9}$  and  $flux_{k9.1}$ ).

825 If the transition fluxes are much higher than the turnover fluxes, then the open and closed states  
826 of the KEAP1-NRF2 complex operate in an equilibrium mode, which means that the ratio of the  
827 two states is predominantly determined by the  $k_3:k_4$  ratio regardless of other parameter values.

828 Parameters  $k_3$  and  $k_4$  describe the DLG-mediated KEAP1 and NRF2 binding. In the literature, its  
829 binding kinetics was determined *in vitro* by using mouse KEAP1-DC fragment and NRF2-Neh2

830 domain fragment (Tong et al. 2006) or extended DLG motif peptide (DLGex) (Fukutomi et al.  
831 2014). However, *in vivo* the DLG binding is mostly an intra-molecular event within the open

832 KEAP1-NRF2 complex, since the ETGE motif has a much higher binding affinity for KEAP1 and  
833 ETGE-mediated binding almost always occurs first to form the open-state complex (Stewart et al.

834 2003). In such *in vivo* scenario,  $k_3$  is actually a first-order, as opposed to a second-order,  
835 association rate constant while  $k_4$  remains as a first-order dissociation rate constant. It is unclear

836 whether in the open state the DLG binding is enhanced since the DLG is in a closer vicinity to the  
837 unoccupied KEAP1 binding site than the DLG in a free NRF2 molecule not yet attached to

838 KEAP1. Regardless, in our first trial, in Model 1 we used the  $k_4$  value measured *in vitro* (Fukutomi  
839 et al. 2014) and adjusted  $k_3$ , as detailed in Table S1 footnote, to achieve a 1:1 ratio for the basal

840 open:closed states. Examining the fluxes clearly revealed that with these parameter settings,  
841  $flux_{k3}$  and  $flux_{k4}$  are absolutely dominant over other turnover fluxes (Table S10). As shown in Fig.

842 2, the open and closed KEAP1-NRF2 complexes remain at a 1:1 ratio in all perturbed conditions  
843 including shutdown of NRF2 synthesis (Fig. 2A), stabilization of NRF2 in the closed state (Fig.  
844 2B), and under a wide range of  $CLASS_{i,v}$  levels (Fig. 2C), demonstrating that Model 1 definitely  
845 operates in an equilibrium mode. However, the experimental study by Baird clearly demonstrated  
846 that under various perturbations similar to above, the closed KEAP1-NRF2 state will eventually  
847 dominate over the open state, thus negating an equilibrium mode of operation (Baird et al. 2013).  
848 It was further suggested that the KEAP1-NRF2 interaction may operate instead in a global cycle  
849 mode where the transition fluxes between the open and closed states are not overwhelmingly  
850 higher than the turnover fluxes, such that KEAP1 in the complex is almost always moved forward  
851 to the next state and eventually exists via the closed complex along with NRF2 degradation, and  
852 recycled to join the free KEAP1 dimer pool.

853

854 The discrepancy between our Model 1's behavior and the cycle mode of operation led us  
855 to Model 2 where the parameters  $k_3$  and  $k_4$  were lowered to alleviate the equilibrium mode of  
856 operation. Model 2 indeed exhibits the behavior consistent with the cycle mode, where the  
857 open:closed ratio decreases in all perturbed conditions (Figs. 3A, 3B, and 3F). The issue with  
858 Model 2 is that parameter  $k_4$ , which describes the dissociation rate constant of DLG binding, is  
859  $1.0E-4 \text{ S}^{-1}$ , only about 1/2000 of the *in vitro* measured value (Table S1). This value translates into  
860 an average lifetime of 167 min for the closed state before it can revert back into the open state,  
861 which is considered too long for such weak binding (Fukutomi et al. 2014). In the same study it  
862 was also demonstrated that ETGE-mediated binding is actually a two-step process, involving an  
863 initial fast binding step followed by a subsequent slow binding step. We therefore wondered  
864 whether the slow binding here may be responsible for the cycle mode behavior. When this idea  
865 was implemented in Model 3, simulations indeed showed such effects on the open:closed ratio  
866 under all perturbed conditions, including shutdown of NRF2 synthesis (Fig. 4B), stabilization of  
867 NRF2 in the closed state (Fig. 4C), and under a wide range of  $CLASS_{i,v}$  levels (Fig. 4G). With the

868 parameter setting for the second-step, slow ETGE binding ( $k_{1.1}$  and  $k_{2.1}$ ),  $flux_{k_{1.1}}$  is much greater  
869 than  $flux_{k_{2.1}}$  (Table S10).  $KEAP1\_NRF2_{open1}$  is the dominant form of the open state at the basal  
870 condition (Fig. 4B and Table S8), and is not in equilibrium with  $KEAP1\_NRF2_{open2}$  (Fig. 4C and  
871 4G). In contrast,  $KEAP1\_NRF2_{open2}$  is always in equilibrium with  $KEAP1\_NRF2_{closed}$  at an  
872 approximate 1:5 ratio as determined by the  $k_4:k_3$  ratio (Fig. 4G). During  $CLASS_{I-V}$  perturbation,  
873  $KEAP1\_NRF2_{open1}$  decreases while  $KEAP1\_NRF2_{open2}$  increases and becomes the dominant  
874 open form, resulting in an overall open:closed ratio that is close to 1:3.5. Therefore, although  
875 Model 3 behaves globally in a cycle mode at the basal condition with  $KEAP1\_NRF2_{open1}$  as the  
876 dominant open form, at high stress levels  $KEAP1\_NRF2_{open2}$  becomes the dominant open form  
877 and the system switches to operate largely in equilibrium mode as far as the overall open:closed  
878 ratio is concerned.

879

### 880 **Hinge-latch hypothesis and class I-V vs. class VI NRF2 activators**

881 An important theory of NRF2 activation is the hinge-latch hypothesis which postulates that the  
882 ETGE-mediated association (i.e., the open-state complex) is always there functioning as a hinge  
883 between KEAP1 dimer and NRF2, while the weaker DLG-mediated association can be latched  
884 on (i.e., forming the closed-state complex) or off (i.e., reverting to the open state complex) by  
885 oxidative stressors (Yamamoto et al. 2018). With Model 3a we tested the effects of hinge-latch  
886 mode of operation on NRF2 activation by altering the  $k'_3:k'_4$  ratio which governs the  
887 intramolecular DLG binding affinity between oxidized/conjugated KEAP1 and NRF2. Our  
888 simulations showed that when the DLG binding affinity is lowered to mimic a hinge-latch, the  
889 maximally induced steady-state levels of total NRF2 and particularly free NRF2 is tangibly  
890 reduced (Figs. 6E and 6F). In contrast, when the  $k'_3:k'_4$  ratio is made higher, i.e., a strengthening  
891 of the latched-on state under oxidative stress, there is an increase, albeit limited, in the maximal  
892 NRF2 levels. These results suggest that a hinge-latch mode of operation may lead to a lessor  
893 NRF2 response to class I-V compounds. The reason for the more muted response in our model

894 is because under oxidative stress, the closed KEAP1-NRF2 complex in which the KEAP1  
895 molecule is modified on the sensor cysteine residues, i.e.,  $KEAP1_o\_NRF2_{closed}$ , has a half-life  
896 (determined by  $k'_6$ ) even longer than those of NRF2 in the free or open complex forms. Therefore,  
897 KEAP1 here reverses the normal role of promoting NRF2 degradation as at the basal condition,  
898 and becomes instead protective of the NRF2 molecule. We also examined the situation when  
899  $KEAP1_o\_NRF2_{closed}$  is not protective of NRF2 by setting  $k'_6$  equal to  $k_5$  such that it degrades with  
900 the same half-life as free NRF2 and as open complex. In this case, the hinge-latch mode of  
901 operation slightly improves the ultrasensitivity of free NRF2 and total NRF2 (Figs. S7E and S7F).  
902 But regardless, when in the hinge-latch mode of operation, the open:closed ratio of  
903 KEAP1-NRF2 complexes increases in response to high  $CLASS_{i-v}$  levels (Figs. 6A-6B and  
904 S7A-S7B), as opposed to the expected decrease, suggesting that the hinge-latch hypothesis  
905 may not be valid for class I-V compounds-induced NRF2 activation. Indeed, using titration NMR  
906 spectroscopy, the most recent study by Yamamoto group clearly demonstrated that  
907 modifications of reactive cysteines of KEAP1 by class I-V oxidants and electrophiles, including  
908 CDDO-Im and sulforaphane targeting Cys151 and 15d-PGJ2 targeting Cys288, do not break the  
909 DLG-mediated binding (Horie et al. 2021).

910  
911 Class VI compounds are those that can bind to the DC region of KEAP1 and thus disrupt  
912 DLG-mediated, and also potentially, ETGE-mediated NRF2 binding. Therefore, the NRF2  
913 stabilization effect of class VI compounds is indirect, by shifting KEAP1-NRF2 complex away  
914 from the ubiquitinatable closed state. An endogenous ligand is p62, which has a  
915 KEAP1-interacting region (KIR) containing a DPSTGE motif that is similar to the ETGE motif of  
916 NRF2 (Lau et al. 2010, Jiang et al. 2015). The motif has similar or even higher binding affinities  
917 for KEAP1 than the DLG motif of NRF2, depending on its phosphorylation status (Komatsu et al.  
918 2010, Ichimura et al. 2013). Small-molecule compounds have also been identified recently as  
919 disruptors of the protein-protein interaction between KEAP1 and NRF2, such as Cpd16 (Jiang et

920 al. 2014) and several others (Yasuda et al. 2017, Lazzara et al. 2020, Lee and Hu 2020). By  
921 displacing DLG binding preferentially, these compounds make the KEAP1-NRF2 complex  
922 function as a hinge-latch as recently demonstrated experimentally (Horie et al. 2021). Our Model  
923 3b captures the hinge-latch behavior in response to class VI NRF2 activators (Fig. 8), and shows  
924 that the open:closed ratio of KEAP1-NRF2 complex actually decreases with increasing  
925 concentrations of class VI activator (Fig. 8E). Simulations of Model 3b also suggest that when the  
926 two monomeric subunits of KEAP1 dimer can both be occupied by a class VI compound, NRF2  
927 activation is more robust because of simultaneous sequestration of free KEAP1 by the  
928 compound (Figs. 8D vs. 8F). Horie et al. indeed showed that with high enough concentrations,  
929 p62 and small-molecule class I-V compounds can completely dissociate NRF2 from KEAP1  
930 dimers, breaking the ETGE-mediated hinge (Horie et al. 2021). A recently identified endogenous  
931 protein, FAM129B, has both DLG and ETGE motifs on the C terminal and can compete with  
932 NRF2 for KEAP1 binding (Cheng 2019). FAM129B is found to be upregulated in many cancers  
933 which have poor prognosis by promoting NRF2 activation and thus chemoresistance.

934

### 935 **Maximal NRF2 activation, ultrasensitivity, and floodgate hypothesis**

936 The maximal fold increase of total NRF2 is determined by the differential half-lives at the basal vs.  
937 severely stressed conditions. With a basal half-life of about 10 min in the cytosol in our models,  
938 and the lengthening of the half-life to over an hour under simulated oxidative stress such as in  
939 Model 3a, total NRF2 increases by 5-fold (Fig. 4D and Tables S8-S9). As discussed above,  
940 under oxidative stress, this model switches from KEAP1-mediated degradation to  
941 KEAP1-mediated stabilization of NRF2, therefore the fold-increase can be even higher when  
942 parameter  $k'_6$  is of lower values (Figs. S3B and S3D). Conversely, the fold-increase becomes  
943 smaller when  $k'_6$  is higher (Fig. S3F). It is also evident that at the basal condition when there is a  
944 higher fraction of the closed KEAP1-NRF2 complex that is rapidly degraded, the system is  
945 poised to produce higher levels of NRF2 in response to stresses, as the closed complex

946 becomes stabilized by a class I-V compound or dissociated by a class VI compound. In Model 3b  
947 which simulates class VI compounds, because there is no closed KEAP1-NRF2 complex with a  
948  $CLASS_{VI}$  molecule attached, the maximal fold-increase of total NRF2 is limited by the half-lives of  
949 free NRF2 and NRF2 in the open KEAP1-NRF2 complexes. In our study parameters  $k_5$ ,  $k'_5$ ,  $k_9$ ,  
950  $k'_9$ ,  $k_{9,1}$  and  $k'_{9,1}$  govern the degradation of these NRF2 species, which have an equal half-life of  
951 40 min. As a result, the maximal fold-increase of total NRF2 in Model 3b cannot exceed  $40/10 =$   
952 4-fold (Fig. 8B and Tables S8-S9).

953  
954 As aforementioned in Introduction, for an adaptive stress response, it is ideal that some  
955 degree of signal amplification, i.e., ultrasensitivity, can be embedded in the feedback circuit to  
956 ensure robust resistance to perturbation. In Models 1, 2, and 3a, free NRF2 exhibits some decent  
957 ultrasensitivity. Molecular mechanisms producing ultrasensitivity can arise from six common  
958 ultrasensitive motifs (Zhang et al. 2013). In the KEAP1-NRF2 module here, it appears that both  
959 zero-order degradation and protein sequestration (molecular titration) are at play simultaneously  
960 to produce NRF2 ultrasensitivity, where the sequestration is mediated by ETGE binding and  
961 zero-order degradation is mediated by saturation of DLG binding. As shown in Figs. 3G-3H and  
962 4H-4I, KEAP1-mediated degradation of NRF2 in the closed KEAP1-NRF2 complex will  
963 eventually saturate when all KEAP1 dimers are occupied by NRF2. Around this saturation point,  
964 KEAP1-mediated NRF2 degradation becomes zero order such that any additional increase in  
965 NRF2 will have to rely on KEAP1-independent mechanism to degrade. As a result of the  
966 nonlinear, zero-order degradation, the steady-state total NRF2 abundance may experience  
967 some steep changes around the point of KEAP1 saturation than when no saturation occurs.  
968 Indeed, for Models 1-3b, the  $n_H$  of total NRF2 is between 1.17-1.35. But with  $LRC_{max}$  between  
969 0.35-42, total NRF2 does not exhibit overt ultrasensitivity because of the high basal level. From  
970 the perspective of free NRF2, this KEAP1 saturation point is also a moment when free NRF2 can  
971 no longer be sequestered by KEAP1, and as a result any additional NRF2 synthesized *de novo*



972 will remain as free NRF2, leading to a steep increase in its abundance. Therefore, both  
973 zero-order degradation (by providing more NRF2 overall) and protein sequestration are at play  
974 simultaneously to produce the ultrasensitivity of free NRF2.

975

976         Conceivably, the abundance of total KEAP1 and whether NRF2 can accumulate to a level  
977 that surpasses this abundance play a critical role in quantitative NRF2 activation. If total NRF2  
978 can never increase to a level higher than KEAP1 dimer, then NRF2 cannot escape the  
979 sequestration by KEAP1 and there will be no ultrasensitivity of free NRF2. This is first illustrated  
980 by setting  $k'_6$  to a higher value such that total NRF2 can only barely match the level of total  
981 KEAP1 (Figs. S2F and S3F). The intracellular NRF2:KEAP1 ratio at basal conditions varies  
982 among different cell types, which can be lower or higher 1:1 (Khalil et al. 2015, Iso et al. 2016).  
983 Since nuclear NRF2 often constitutes a considerable fraction of total NRF2 at basal conditions  
984 (Khalil et al. 2015, Iso et al. 2016), the cytosolic NRF2:KEAP1 ratio can be actually even lower  
985 than the values reported for the whole cells. Varying the abundance of KEAP1 in the models has  
986 some interesting results. By increasing KEAP1, its role in further destabilizing Nrf2 is limited  
987 because it is already in excess, and as a result total NRF2 does not increase further (Fig. 7A).  
988 But increasing KEAP1 will be more effective as a sequester to inhibit Nrf2. There seems to be an  
989 optimal KEAP1 abundance that can produce the steepest  $NRF2_{free}$  response (Fig. 7B). When  
990 KEAP1 is too low, NRF2 is constitutively activated, but when KEAP1 is too high, free NRF2 is  
991 constitutively suppressed.

992

993         This sequestering role of KEAP1 is consistent with the floodgate hypothesis which  
994 postulates that stabilization of NRF2 due to loss of KEAP1 activity as an E3 ligase adaptor  
995 protein is not sufficient to initialize NRF2 nuclear translocation; NRF2 has to accumulate to a  
996 higher level to overflow the KEAP1 gate to move to the nucleus (Yamamoto et al. 2018). A  
997 potential caveat of this mechanism is that it takes some time to produce enough NRF2 to

998 saturate KEAP1, therefore the free NRF2 response can be delayed as we demonstrated with our  
999 models. However, it is likely that at the basal condition, the cytosolic NRF2:KEAP1 ratio is near  
1000 parity in some cells such that KEAP1 is near saturation. As a result, the system is at a tipping  
1001 point, poised to respond to a slight increase in oxidative stress to overwhelm KEAP1 and cause  
1002 an immediate and steep increase in free NRF2 (Baird et al. 2013).

1003  
1004 While both Models 2 and 3a are cycle models, the ultrasensitivity of free NRF2 exhibited  
1005 by Model 3a, which has two-step ETGE binding, is somehow weaker than Model 2. As described  
1006 in Results, this is partly because a higher free NRF2 level is required to maintain the same  
1007 turnover fluxes through different NRF2 species (Figs. 4H and 4I) at the basal steady state in  
1008 Model 3a, resulting in a lesser zero-order degradation effect. The apparent dissociation constant  
1009 for the ETGE-mediated two-step binding is 7.54 nM, which is lower than the 20 nM used in Model  
1010 2. However, at the basal condition, free NRF2 is higher in Models 3a than Model 2 as a result of  
1011 the two-step binding and slow fluxes through the second-step binding. A higher basal level will  
1012 always reduce the degree of ultrasensitivity (Zhang et al. 2013), despite that Models 2 and 3a  
1013 have comparable maximally induced free NRF2 levels (Table S9). By increasing the binding  
1014 affinity of ETGE, e.g., through increasing  $k_1$  and  $k_{1,1}$ , to reduce basal free NRF2, the  
1015 ultrasensitivity of Model 3a is improved dramatically (Figs. 5B and 5D).

1016  
1017 With both  $n_H$  and  $LRC_{max}$  of free NRF2 close to unity, the ultrasensitivity for class VI  
1018 compounds as in Model 3b is basically absent. In contrast to class I-V compounds, a class VI  
1019 compound does not need to induce total NRF2 to a level that exceeds total KEAP1 to produce  
1020 tangible increase in free NRF2. This is because when a class VI compound can bind to both of  
1021 the monomeric subunits of KEAP1 dimer, it would titrate free KEAP1 away, essentially lowering the  
1022 amount of available KEAP1 that can sequester NRF2. This lowering of the “floodgate” can result  
1023 in a much higher level of free NRF2 that can be maximally induced by class VI compounds than

1024 class I-V compounds (Figs. 8D vs. 4G and Table S9). However, because of the reduced  
1025 sequestration by KEAP1, the ultrasensitivity of free NRF2 is lost.

1026

### 1027 **Response of nuclear NRF2**

1028 To transcriptionally regulate its target genes, NRF2 needs to translocate into the nucleus where it  
1029 dimerizes with sMaf to gain affinity for the AREs in promoters. The flux of nuclear translocation  
1030 constitutes a load to the cytosolic NRF2. At a constant NRF2 production rate in the cytosol, this  
1031 nuclear load is expected to alter the dynamics of NRF2 activation. With Models 4a and 4b we  
1032 made the assumptions that KEAP1 and NRF2 interactions in the nucleus follow the same kinetic  
1033 parameters as in the cytosol except that nuclear KEAP1 is not able to mediate the ubiquitination  
1034 and degradation of NRF2 and is not subject to redox modification by class I-V compounds or  
1035 binding by class VI compounds. With higher abundance of nuclear NRF2 than KEAP1, as  
1036 observed in RAW 264.7 cells and potentially many other cell types (Iso et al. 2016), nuclear  
1037 KEAP1 is nearly saturated by NRF2, resulting in low basal free nuclear KEAP1 dimer and high  
1038 free nuclear NRF2 levels. These configurations result in a net nuclear influx of NRF2 that is 22% of  
1039 the NRF2 production rate in the cytosol (Table S10). Therefore, net nuclear importing of NRF2  
1040 constitutes a significant load of NRF2 production. It can thus be estimated that even under  
1041 oxidative stress that completely terminates cytosolic NRF2 degradation and all cytosolic NRF2  
1042 translocates into the nucleus, total nuclear NRF2 cannot increase by > 5-fold. Our simulations  
1043 confirmed this prediction (Figs. 9E and 10F, Tables S8-S9), and the fold increase of nuclear free  
1044 NRF2 is only slightly higher than the total. Class VI activators seem to have a larger effect on  
1045 maximal nuclear NRF2 (4.2-fold) than class I-V activators (2.6-fold). This is due to the  
1046 KEAP1-titrating effects of a class VI activator, which reduces free cytosolic KEAP1, pushing  
1047 more NRF2 into the nucleus. Nonetheless these lesser responses contrast with the nearly  
1048 10-fold increase in nuclear NRF2 under exposure to DEM at 100  $\mu$ M in RAW 264.7 cells which  
1049 our model is partially based upon (Iso et al. 2016). For nuclear NRF2 to increase to higher levels,

1050 additional mechanisms have to be at play which are not included in our models. These include (i)  
1051 increased NRF2 production through transcriptional autoregulation, which has been confirmed in  
1052 many cell types including RAW 264.7 cells (Kwak et al. 2002, Pi et al. 2003, Pi et al. 2008); (ii)  
1053 reduced nuclear exporting of NRF2 due to redox-sensitive cysteine modification of the nuclear  
1054 export signal (NES) sequence in the Neh5 domain of NRF2 (Li et al. 2006); (iii) stabilization of  
1055 nuclear NRF2 under oxidative stress; (iv) lower nuclear NRF2 load at the basal condition such  
1056 that there is still more reserve capacity for nuclear NRF2 accumulation.

1057

1058 Free nuclear NRF2 does not exhibit overt ultrasensitivity in either of the two models. Part  
1059 of the reason is due to its high basal level and smaller fold increase of total nuclear NRF2  
1060 discussed above. However, a number of mechanisms that can potentially contribute to  
1061 ultrasensitivity have been confirmed in the KEAP1-NRF2 system. These mechanisms include (i)  
1062 positive transcriptional autoregulation of both NRF2 and sMaf (Kwak et al. 2002, Katsuoka et al.  
1063 2005), (ii) molecular titration of sMaf by inhibitor Bach1 (Igarashi et al. 1998), (iii) positive  
1064 feedback through NRF2 induction of p62 which can titrate KEAP1 away from NRF2 and also  
1065 promote KEAP1 autophagy (Katsuragi et al. 2016), and (iv) multi-step signaling through (a)  
1066 enhanced nuclear NRF2 accumulation due to redox modification of NES as mentioned above (Li  
1067 et al. 2006) and (b) redox-sensitive nuclear exporting of Bach1 (Suzuki et al. 2003,  
1068 Dhakshinamoorthy et al. 2005). It is highly likely that these mechanisms converge to produce  
1069 ultrasensitive nuclear free NRF2 accumulation.

1070

## 1071 **Limitations**

1072 The KEAP1-NRF2 module has been modeled mathematically as part of larger networks. We  
1073 have constructed NRF2-mediated pathways of antioxidant induction and phase II enzyme  
1074 induction, containing negative feedback, incoherent feedforward, and a variety of ultrasensitive  
1075 motifs to understand the nonlinear dose-response relationship under oxidative stress (Zhang and

1076 Andersen 2007, Zhang et al. 2009). Blis and his colleagues adapted these models to interpret  
1077 and predict antioxidant gene induction in human renal cells in response to cyclosporine (Hamon  
1078 et al. 2014), and glutathione depletion in liver microfluidic chips in response to flutamide (Leclerc  
1079 et al. 2014). Khalil et al. constructed a model of KEAP1-NRF2/sMaf-ARE activation and its  
1080 interaction with the peroxiredoxin and thioredoxin antioxidant enzymes in controlling intracellular  
1081 H<sub>2</sub>O<sub>2</sub> levels and regulating the reduction of KEAP1, in which one-step ETGE binding was  
1082 considered (Khalil et al. 2015). Xue et al. observed a basal NRF2 cytosol-nucleus oscillation  
1083 behavior in cells with a period of about 2 hours for which they constructed a mathematical model  
1084 of negative feedback through NRF2 phosphorylation and dephosphorylation without involving  
1085 changes in the abundance (Xue et al. 2015). Kolodkin et al. has recently incorporated the  
1086 KEAP1-NRF2 component into an ROS dynamic network to explore the design principles relevant  
1087 to network-based therapies for Parkinson disease (Kolodkin et al. 2020). Compared to the  
1088 previous work, our present study provided a much more detailed analysis of the KEAP1-NRF2  
1089 module itself, which can be adapted and included in future systems-level models of antioxidant  
1090 and detoxification responses.

1091  
1092       There are several limitations of the present study, however. In the models we have  
1093 limited the action of class I-V and VI compounds on the KEAP1 molecules in the cytosol only,  
1094 however it is possible that these compounds, especially class VI, may still compete for KEAP1 in  
1095 the nucleus to further drive NRF2 activation. We have assumed separate pools of cytosolic and  
1096 nuclear KEAP1 without exchange. However, it has been shown that KEAP1 may also control  
1097 postinduction repression of the NRF2-mediated antioxidant response by escorting NRF2 out of  
1098 the nucleus (Sun et al. 2007). The DLG-mediated binding kinetics has been measured *in vitro*  
1099 with peptide fragments of KEAP1 and NRF2 as inter-molecular event following the law of mass  
1100 action. Measuring the binding kinetics as an intra-molecular event as occurring with full-length  
1101 proteins will help reduce the uncertainty of model parameterization. It is also unclear whether the

1102 modification of cysteine residues of both KEAP1 subunits of the dimer will have any differential  
1103 effects on NRF2 ubiquitination than only one subunit is modified. Lastly, the parameterization  
1104 and calibration of our models are based on experimental measurements from multiple cell types,  
1105 such as RAW 264.7 and HEK293 cells, and under various experimental conditions. Therefore,  
1106 the parameter values and model responses do not represent an ideal “average” cell. However,  
1107 we systemically varied parameters where applicable in our study to explore their effects on NRF2  
1108 response. All in all, future iterations of the KEAP1-NRF2 model should address these limitations  
1109 as more quantitative information, such as binding and degradation kinetics of all NRF2 forms in  
1110 complex with KEAP1, is obtained.

1111

## 1112 **Conclusions**

1113 Robustly inducing antioxidant and detoxification genes to cope with cellular stress imposed by  
1114 oxidative and electrophilic chemicals requires timely and sufficient NRF2 accumulation and  
1115 translocation into the nucleus. KEAP1 plays a dual role in repressing NRF2 – promoting its  
1116 degradation to keep its total abundance low and sequestering to keep its free abundance low.  
1117 The floodgate hypothesis captures some of the dual actions of KEAP1 (Iso et al. 2016, Suzuki  
1118 and Yamamoto 2017). Our modeling revealed here that the quantitative aspect of protein  
1119 stabilization of NRF2 and nuclear translocation can be better understood as a water tank model  
1120 that overflows due to drain closure (Fig. 11A), which we believe is an improvement over the  
1121 floodgate analogy. Here, the water is poured into the large water tank at a constant rate, just as  
1122 NRF2 is produced in the cytosol. Since the drain is open, most of the water will leave the tank  
1123 with a small amount remaining and leaking to the small tank (nucleus). These events are like  
1124 NRF2 being actively degraded by KEAP1 and cytosolic and nuclear NRF2 levels are low. If a  
1125 stopper is partially put in place, the water will drain slowly, and the water level in the large tank  
1126 will rise, however it is still being held by the large tank without much going into the small tank.

1127 This is like under mild stress, KEAP1-dependent NRF2 degradation is partially stopped, total  
1128 NRF2 will increase but because of the sequestration by KEAP1, it still remains largely in the  
1129 cytosol. Therefore, the height of the large water tank here is equivalent to the total cytosolic  
1130 KEAP1 dimer. When the stopper is further pushed in to completely block the drain, the water  
1131 level will rise and eventually overflow the large tank and flood the small tank. This is like under  
1132 severe oxidative stress, KEAP1-mediated NRF2 degradation is totally shut down, NRF2  
1133 accumulates to a level exceeding cytosolic KEAP1 dimer, and free NRF2 rises sharply and  
1134 translocates into the nucleus. Modification of KEAP1 cysteine by class I-V compounds is like  
1135 slowing the drain without affecting the height of the large water tank, while binding of class VI  
1136 compounds to both of the two subunits of KEAP1 dimer is like simultaneously slowing the drain  
1137 and lowering the height of the large water tank. The differential action of this water-tank model  
1138 can be captured by a reduced mathematical model of KEAP1-NRF2 interaction (Fig. 11B). The  
1139 free nuclear NRF2 response to class I-V compounds is potentially more ultrasensitive than that  
1140 to class VI compounds, while at lower concentrations class VI compounds may activate more  
1141 nuclear NRF2 than class I-V compounds (Fig. 11C).

1142  
1143 Quantitative understanding of NRF2 activation can have many implications. A detailed  
1144 kinetic model like the one we presented here can help to explore the systems behavior of cellular  
1145 oxidative stress responses. It may help to better understand cancer chemoresistance, where  
1146 mutation in either NRF2 or KEAP1 can lead to constitutive NRF2 activation or a more robust  
1147 activation in response to chemo-drugs. It may also help with using a synthetic biology approach  
1148 to improve current and design novel classes of NRF2 activators or inhibitors that can more  
1149 effectively turn on or off NRF2 activity. Such mechanistically-based KEAP1-NRF2 model can  
1150 also help to interpret and predict NRF2 activation and optimize experimental design of *in vitro*  
1151 toxicity screening assays for environmental oxidative stressors.

1152

1153

## **ACKNOWLEDGEMENTS**

1154 This research was supported in part by the National Natural Science Foundation of China:  
1155 81830099 (J.P.), 82020108027 (J.P.) and 81602824 (S.L.); Liaoning Key Research and  
1156 Development Guidance Plan 2019JH8/10300012 (J.P.); NIEHS Superfund Research grant  
1157 P42ES04911, and NIEHS HERCULES grant P30ES019776.

1158

1159

## **CONFLICT OF INTEREST**

1160 The authors declare no conflict of interest.

1161



1162

## REFERENCES

1163 Adimora, N. J., D. P. Jones and M. L. Kemp (2010). "A model of redox kinetics implicates the thiol  
1164 proteome in cellular hydrogen peroxide responses." Antioxid Redox Signal **13**(6): 731-743.

1165 Alam, J., E. Killeen, P. Gong, R. Naquin, B. Hu, D. Stewart, J. R. Ingelfinger and K. A. Nath  
1166 (2003). "Heme activates the heme oxygenase-1 gene in renal epithelial cells by stabilizing Nrf2."  
1167 Am J Physiol Renal Physiol **284**(4): F743-752.

1168 Altszyler, E., A. C. Ventura, A. Colman-Lerner and A. Chernomoretz (2017). "Ultrasensitivity in  
1169 signaling cascades revisited: Linking local and global ultrasensitivity estimations." PLoS One  
1170 **12**(6): e0180083.

1171 Baird, L., D. Llères, S. Swift and A. T. Dinkova-Kostova (2013). "Regulatory flexibility in the  
1172 Nrf2-mediated stress response is conferred by conformational cycling of the Keap1-Nrf2 protein  
1173 complex." Proc Natl Acad Sci U S A **110**(38): 15259-15264.

1174 Baird, L. and M. Yamamoto (2020). "The Molecular Mechanisms Regulating the KEAP1-NRF2  
1175 Pathway." Mol Cell Biol **40**(13).

1176 Bellezza, I., I. Giambanco, A. Minelli and R. Donato (2018). "Nrf2-Keap1 signaling in oxidative  
1177 and reductive stress." Biochim Biophys Acta Mol Cell Res **1865**(5): 721-733.

1178 Buchler, N. E. and M. Louis (2008). "Molecular titration and ultrasensitivity in regulatory  
1179 networks." J Mol Biol **384**(5): 1106-1119.

1180 Burroughs, A. F., S. Eluhu, D. Whalen, J. S. Goodwin, A. M. Sakwe and I. J. Arinze (2018).  
1181 "PML-Nuclear Bodies Regulate the Stability of the Fusion Protein Dendra2-Nrf2 in the Nucleus."  
1182 Cellular Physiology and Biochemistry **47**(2): 800-816.

1183 Canning, P., F. J. Sorrell and A. N. Bullock (2015). "Structural basis of Keap1 interactions with  
1184 Nrf2." Free Radic Biol Med **88**(Pt B): 101-107.

1185 Chen, Y., D. Inoyama, A. N. Kong, L. J. Beamer and L. Hu (2011). "Kinetic analyses of  
1186 Keap1-Nrf2 interaction and determination of the minimal Nrf2 peptide sequence required for  
1187 Keap1 binding using surface plasmon resonance." Chem Biol Drug Des **78**(6): 1014-1021.

1188 Chowdhry, S., Y. Zhang, M. McMahon, C. Sutherland, A. Cuadrado and J. D. Hayes (2013). "Nrf2  
1189 is controlled by two distinct  $\beta$ -TrCP recognition motifs in its Neh6 domain, one of which can be  
1190 modulated by GSK-3 activity." Oncogene **32**(32): 3765-3781.

1191 Crinelli, R., C. Zara, L. Galluzzi, G. Buffi, C. Ceccarini, M. Smietana, M. Mari, M. Magnani and A.  
1192 Fraternali (2021). "Activation of NRF2 and ATF4 Signaling by the Pro-Glutathione Molecule  
1193 I-152, a Co-Drug of N-Acetyl-Cysteine and Cysteamine." Antioxidants (Basel) **10**(2).

- 1194 Dayalan Naidu, S. and A. T. Dinkova-Kostova (2020). "KEAP1, a cysteine-based sensor and a  
1195 drug target for the prevention and treatment of chronic disease." Open Biol **10**(6): 200105.
- 1196 Dhakshinamoorthy, S., A. K. Jain, D. A. Bloom and A. K. Jaiswal (2005). "Bach1 competes with  
1197 Nrf2 leading to negative regulation of the antioxidant response element (ARE)-mediated  
1198 NAD(P)H:quinone oxidoreductase 1 gene expression and induction in response to antioxidants."  
1199 J Biol Chem **280**(17): 16891-16900.
- 1200 Dinkova-Kostova, A. T., W. D. Holtzclaw, R. N. Cole, K. Itoh, N. Wakabayashi, Y. Katoh, M.  
1201 Yamamoto and P. Talalay (2002). "Direct evidence that sulfhydryl groups of Keap1 are the  
1202 sensors regulating induction of phase 2 enzymes that protect against carcinogens and oxidants."  
1203 Proc Natl Acad Sci U S A **99**(18): 11908-11913.
- 1204 Egger, A. L., G. Liu, J. M. Pezzuto, R. B. van Breemen and A. D. Mesecar (2005). "Modifying  
1205 specific cysteines of the electrophile-sensing human Keap1 protein is insufficient to disrupt  
1206 binding to the Nrf2 domain Neh2." Proc Natl Acad Sci U S A **102**(29): 10070-10075.
- 1207 Ferrell, J. E., Jr. and S. H. Ha (2014). "Ultrasensitivity part I: Michaelian responses and  
1208 zero-order ultrasensitivity." Trends Biochem Sci **39**(10): 496-503.
- 1209 Ferrell, J. E., Jr. and S. H. Ha (2014). "Ultrasensitivity part II: multisite phosphorylation,  
1210 stoichiometric inhibitors, and positive feedback." Trends Biochem Sci **39**(11): 556-569.
- 1211 Fukutomi, T., K. Takagi, T. Mizushima, N. Ohuchi and M. Yamamoto (2014). "Kinetic,  
1212 thermodynamic, and structural characterizations of the association between Nrf2-DLGex degran  
1213 and Keap1." Mol Cell Biol **34**(5): 832-846.
- 1214 Goldbeter, A. and D. E. Koshland, Jr. (1982). "Sensitivity amplification in biochemical systems."  
1215 Q Rev Biophys **15**(3): 555-591.
- 1216 Hamon, J., P. Jennings and F. Y. Bois (2014). "Systems biology modeling of omics data: effect of  
1217 cyclosporine a on the Nrf2 pathway in human renal cells." BMC Syst Biol **8**: 76.
- 1218 Hancock, R., H. C. Bertrand, T. Tsujita, S. Naz, A. El-Bakry, J. Laoruchpong, J. D. Hayes and G.  
1219 Wells (2012). "Peptide inhibitors of the Keap1-Nrf2 protein-protein interaction." Free Radic Biol  
1220 Med **52**(2): 444-451.
- 1221 Hayes, J. D., S. Chowdhry, A. T. Dinkova-Kostova and C. Sutherland (2015). "Dual regulation of  
1222 transcription factor Nrf2 by Keap1 and by the combined actions of  $\beta$ -TrCP and GSK-3." Biochem  
1223 Soc Trans **43**(4): 611-620.
- 1224 He, X., M. G. Chen, G. X. Lin and Q. Ma (2006). "Arsenic induces NAD(P)H-quinone  
1225 oxidoreductase I by disrupting the Nrf2 x Keap1 x Cul3 complex and recruiting Nrf2 x Maf to the  
1226 antioxidant response element enhancer." J Biol Chem **281**(33): 23620-23631.

- 1227 Horie, Y., T. Suzuki, J. Inoue, T. Iso, G. Wells, T. W. Moore, T. Mizushima, A. T. Dinkova-Kostova,  
1228 T. Kasai, T. Kamei, S. Koshiba and M. Yamamoto (2021). "Molecular basis for the disruption of  
1229 Keap1–Nrf2 interaction via Hinge & Latch mechanism." Communications Biology **4**(1): 576.
- 1230 Ichimura, Y., S. Waguri, Y. S. Sou, S. Kageyama, J. Hasegawa, R. Ishimura, T. Saito, Y. Yang, T.  
1231 Kouno, T. Fukutomi, T. Hoshii, A. Hirao, K. Takagi, T. Mizushima, H. Motohashi, M. S. Lee, T.  
1232 Yoshimori, K. Tanaka, M. Yamamoto and M. Komatsu (2013). "Phosphorylation of p62 activates  
1233 the Keap1-Nrf2 pathway during selective autophagy." Mol Cell **51**(5): 618-631.
- 1234 Igarashi, K., H. Hoshino, A. Muto, N. Suwabe, S. Nishikawa, H. Nakauchi and M. Yamamoto  
1235 (1998). "Multivalent DNA binding complex generated by small Maf and Bach1 as a possible  
1236 biochemical basis for beta-globin locus control region complex." J Biol Chem **273**(19):  
1237 11783-11790.
- 1238 Iso, T., T. Suzuki, L. Baird and M. Yamamoto (2016). "Absolute Amounts and Status of the  
1239 Nrf2-Keap1-Cul3 Complex within Cells." Mol Cell Biol **36**(24): 3100-3112.
- 1240 Itoh, K., J. Mimura and M. Yamamoto (2010). "Discovery of the negative regulator of Nrf2, Keap1:  
1241 a historical overview." Antioxid Redox Signal **13**(11): 1665-1678.
- 1242 Itoh, K., N. Wakabayashi, Y. Katoh, T. Ishii, K. Igarashi, J. D. Engel and M. Yamamoto (1999).  
1243 "Keap1 represses nuclear activation of antioxidant responsive elements by Nrf2 through binding  
1244 to the amino-terminal Neh2 domain." Genes Dev **13**(1): 76-86.
- 1245 Itoh, K., N. Wakabayashi, Y. Katoh, T. Ishii, T. O'Connor and M. Yamamoto (2003). "Keap1  
1246 regulates both cytoplasmic-nuclear shuttling and degradation of Nrf2 in response to  
1247 electrophiles." Genes Cells **8**(4): 379-391.
- 1248 Jiang, T., B. Harder, M. Rojo de la Vega, P. K. Wong, E. Chapman and D. D. Zhang (2015). "p62  
1249 links autophagy and Nrf2 signaling." Free Radic Biol Med **88**(Pt B): 199-204.
- 1250 Jiang, Z. Y., M. C. Lu, L. L. Xu, T. T. Yang, M. Y. Xi, X. L. Xu, X. K. Guo, X. J. Zhang, Q. D. You  
1251 and H. P. Sun (2014). "Discovery of potent Keap1-Nrf2 protein-protein interaction inhibitor based  
1252 on molecular binding determinants analysis." J Med Chem **57**(6): 2736-2745.
- 1253 Katoh, Y., K. Iida, M. I. Kang, A. Kobayashi, M. Mizukami, K. I. Tong, M. McMahon, J. D. Hayes,  
1254 K. Itoh and M. Yamamoto (2005). "Evolutionary conserved N-terminal domain of Nrf2 is essential  
1255 for the Keap1-mediated degradation of the protein by proteasome." Arch Biochem Biophys  
1256 **433**(2): 342-350.
- 1257 Katsuoka, F., H. Motohashi, J. D. Engel and M. Yamamoto (2005). "Nrf2 transcriptionally  
1258 activates the mafG gene through an antioxidant response element." J Biol Chem **280**(6):  
1259 4483-4490.

- 1260 Katsuoka, F., H. Motohashi, T. Ishii, H. Aburatani, J. D. Engel and M. Yamamoto (2005). "Genetic  
1261 evidence that small maf proteins are essential for the activation of antioxidant response  
1262 element-dependent genes." Mol Cell Biol **25**(18): 8044-8051.
- 1263 Katsuragi, Y., Y. Ichimura and M. Komatsu (2016). "Regulation of the Keap1–Nrf2 pathway by  
1264 p62/SQSTM1." Current Opinion in Toxicology **1**: 54-61.
- 1265 Khalil, H. S., A. Goltsov, S. P. Langdon, D. J. Harrison, J. Bown and Y. Deeni (2015).  
1266 "Quantitative analysis of NRF2 pathway reveals key elements of the regulatory circuits  
1267 underlying antioxidant response and proliferation of ovarian cancer cells." J Biotechnol **202**:  
1268 12-30.
- 1269 Kobayashi, A., M. I. Kang, H. Okawa, M. Ohtsuji, Y. Zenke, T. Chiba, K. Igarashi and M.  
1270 Yamamoto (2004). "Oxidative stress sensor Keap1 functions as an adaptor for Cul3-based E3  
1271 ligase to regulate proteasomal degradation of Nrf2." Mol Cell Biol **24**(16): 7130-7139.
- 1272 Kobayashi, A., M. I. Kang, Y. Watai, K. I. Tong, T. Shibata, K. Uchida and M. Yamamoto (2006).  
1273 "Oxidative and electrophilic stresses activate Nrf2 through inhibition of ubiquitination activity of  
1274 Keap1." Mol Cell Biol **26**(1): 221-229.
- 1275 Kobayashi, M., L. Li, N. Iwamoto, Y. Nakajima-Takagi, H. Kaneko, Y. Nakayama, M. Eguchi, Y.  
1276 Wada, Y. Kumagai and M. Yamamoto (2009). "The antioxidant defense system Keap1-Nrf2  
1277 comprises a multiple sensing mechanism for responding to a wide range of chemical  
1278 compounds." Mol Cell Biol **29**(2): 493-502.
- 1279 Kobayashi, M. and M. Yamamoto (2005). "Molecular mechanisms activating the Nrf2-Keap1  
1280 pathway of antioxidant gene regulation." Antioxid Redox Signal **7**(3-4): 385-394.
- 1281 Kolodkin, A. N., R. P. Sharma, A. M. Colangelo, A. Ignatenko, F. Martorana, D. Jennen, J. J.  
1282 Briedé, N. Brady, M. Barberis, T. Mondeel, M. Papa, V. Kumar, B. Peters, A. Skupin, L.  
1283 Alberghina, R. Balling and H. V. Westerhoff (2020). "ROS networks: designs, aging, Parkinson's  
1284 disease and precision therapies." NPJ Syst Biol Appl **6**(1): 34.
- 1285 Komatsu, M., H. Kurokawa, S. Waguri, K. Taguchi, A. Kobayashi, Y. Ichimura, Y. S. Sou, I. Ueno,  
1286 A. Sakamoto, K. I. Tong, M. Kim, Y. Nishito, S. Iemura, T. Natsume, T. Ueno, E. Kominami, H.  
1287 Motohashi, K. Tanaka and M. Yamamoto (2010). "The selective autophagy substrate p62  
1288 activates the stress responsive transcription factor Nrf2 through inactivation of Keap1." Nat Cell  
1289 Biol **12**(3): 213-223.
- 1290 Kwak, M. K., K. Itoh, M. Yamamoto and T. W. Kensler (2002). "Enhanced expression of the  
1291 transcription factor Nrf2 by cancer chemopreventive agents: role of antioxidant response  
1292 element-like sequences in the nrf2 promoter." Mol Cell Biol **22**(9): 2883-2892.

- 1293 Lau, A., X. J. Wang, F. Zhao, N. F. Villeneuve, T. Wu, T. Jiang, Z. Sun, E. White and D. D. Zhang  
1294 (2010). "A noncanonical mechanism of Nrf2 activation by autophagy deficiency: direct interaction  
1295 between Keap1 and p62." Mol Cell Biol **30**(13): 3275-3285.
- 1296 Lazzara, P. R., B. P. David, A. Ankireddy, B. G. Richardson, K. Dye, K. M. Ratia, S. P. Reddy and  
1297 T. W. Moore (2020). "Isoquinoline Kelch-like ECH-Associated Protein 1-Nuclear Factor  
1298 (Erythroid-Derived 2)-like 2 (KEAP1-NRF2) Inhibitors with High Metabolic Stability." J Med Chem  
1299 **63**(12): 6547-6560.
- 1300 Leclerc, E., J. Hamon, A. Legendre and F. Y. Bois (2014). "Integration of pharmacokinetic and  
1301 NRF2 system biology models to describe reactive oxygen species production and subsequent  
1302 glutathione depletion in liver microfluidic biochips after flutamide exposure." Toxicol In Vitro **28**(7):  
1303 1230-1241.
- 1304 Lee, S. and L. Hu (2020). "Nrf2 activation through the inhibition of Keap1-Nrf2 protein-protein  
1305 interaction." Med Chem Res **29**(5): 846-867.
- 1306 Legewie, S., N. Bluthgen and H. Herzog (2005). "Quantitative analysis of ultrasensitive  
1307 responses." FEBS J **272**(16): 4071-4079.
- 1308 Li, W., S. W. Yu and A. N. Kong (2006). "Nrf2 possesses a redox-sensitive nuclear exporting  
1309 signal in the Neh5 transactivation domain." J Biol Chem **281**(37): 27251-27263.
- 1310 Li, X., D. Zhang, M. Hannink and L. J. Beamer (2004). "Crystal structure of the Kelch domain of  
1311 human Keap1." J Biol Chem **279**(52): 54750-54758.
- 1312 Lo, S. C., X. Li, M. T. Henzl, L. J. Beamer and M. Hannink (2006). "Structure of the Keap1:Nrf2  
1313 interface provides mechanistic insight into Nrf2 signaling." Embo j **25**(15): 3605-3617.
- 1314 Malhotra, D., E. Portales-Casamar, A. Singh, S. Srivastava, D. Arenillas, C. Happel, C. Shyr, N.  
1315 Wakabayashi, T. W. Kensler, W. W. Wasserman and S. Biswal (2010). "Global mapping of  
1316 binding sites for Nrf2 identifies novel targets in cell survival response through ChIP-Seq profiling  
1317 and network analysis." Nucleic Acids Res **38**(17): 5718-5734.
- 1318 McMahon, M., N. Thomas, K. Itoh, M. Yamamoto and J. D. Hayes (2004). "Redox-regulated  
1319 turnover of Nrf2 is determined by at least two separate protein domains, the redox-sensitive  
1320 Neh2 degron and the redox-insensitive Neh6 degron." J Biol Chem **279**(30): 31556-31567.
- 1321 McMahon, M., N. Thomas, K. Itoh, M. Yamamoto and J. D. Hayes (2006). "Dimerization of  
1322 substrate adaptors can facilitate cullin-mediated ubiquitylation of proteins by a "tethering"  
1323 mechanism: a two-site interaction model for the Nrf2-Keap1 complex." J Biol Chem **281**(34):  
1324 24756-24768.
- 1325 Moi, P., K. Chan, I. Asunis, A. Cao and Y. W. Kan (1994). "Isolation of NF-E2-related factor 2

- 1326 (Nrf2), a NF-E2-like basic leucine zipper transcriptional activator that binds to the tandem  
1327 NF-E2/AP1 repeat of the beta-globin locus control region." Proc Natl Acad Sci U S A **91**(21):  
1328 9926-9930.
- 1329 Nguyen, T., P. J. Sherratt and C. B. Pickett (2003). "Regulatory mechanisms controlling gene  
1330 expression mediated by the antioxidant response element." Annu Rev Pharmacol Toxicol **43**:  
1331 233-260.
- 1332 Ogura, T., K. I. Tong, K. Mio, Y. Maruyama, H. Kurokawa, C. Sato and M. Yamamoto (2010).  
1333 "Keap1 is a forked-stem dimer structure with two large spheres enclosing the intervening, double  
1334 glycine repeat, and C-terminal domains." Proc Natl Acad Sci U S A **107**(7): 2842-2847.
- 1335 Paunkov, A., D. V. Chartoumpekis, P. G. Ziros and G. P. Sykiotis (2019). "A Bibliometric Review  
1336 of the Keap1/Nrf2 Pathway and its Related Antioxidant Compounds." Antioxidants (Basel) **8**(9).
- 1337 Pi, J., W. Qu, J. M. Reece, Y. Kumagai and M. P. Waalkes (2003). "Transcription factor Nrf2  
1338 activation by inorganic arsenic in cultured keratinocytes: involvement of hydrogen peroxide." Exp  
1339 Cell Res **290**(2): 234-245.
- 1340 Pi, J., Q. Zhang, C. G. Woods, V. Wong, S. Collins and M. E. Andersen (2008). "Activation of  
1341 Nrf2-mediated oxidative stress response in macrophages by hypochlorous acid." Toxicol Appl  
1342 Pharmacol **226**(3): 236-243.
- 1343 Rada, P., A. I. Rojo, S. Chowdhry, M. McMahon, J. D. Hayes and A. Cuadrado (2011).  
1344 "SCF/{beta}-TrCP promotes glycogen synthase kinase 3-dependent degradation of the Nrf2  
1345 transcription factor in a Keap1-independent manner." Mol Cell Biol **31**(6): 1121-1133.
- 1346 Sekhar, K. R., G. Rachakonda and M. L. Freeman (2010). "Cysteine-based regulation of the  
1347 CUL3 adaptor protein Keap1." Toxicol Appl Pharmacol **244**(1): 21-26.
- 1348 Selvaggio, G., P. Coelho and A. Salvador (2018). "Mapping the phenotypic repertoire of the  
1349 cytoplasmic 2-Cys peroxiredoxin - Thioredoxin system. 1. Understanding commonalities and  
1350 differences among cell types." Redox Biol **15**: 297-315.
- 1351 Stewart, D., E. Killeen, R. Naquin, S. Alam and J. Alam (2003). "Degradation of transcription  
1352 factor Nrf2 via the ubiquitin-proteasome pathway and stabilization by cadmium." J Biol Chem  
1353 **278**(4): 2396-2402.
- 1354 Sun, Z., S. Zhang, J. Y. Chan and D. D. Zhang (2007). "Keap1 controls postinduction repression  
1355 of the Nrf2-mediated antioxidant response by escorting nuclear export of Nrf2." Mol Cell Biol  
1356 **27**(18): 6334-6349.
- 1357 Suzuki, H., S. Tashiro, J. Sun, H. Doi, S. Satomi and K. Igarashi (2003). "Cadmium induces  
1358 nuclear export of Bach1, a transcriptional repressor of heme oxygenase-1 gene." J Biol Chem

- 1359 **278**(49): 49246-49253.
- 1360 Suzuki, T. and M. Yamamoto (2017). "Stress-sensing mechanisms and the physiological roles of  
1361 the Keap1-Nrf2 system during cellular stress." J Biol Chem **292**(41): 16817-16824.
- 1362 Tonelli, C., I. I. C. Chio and D. A. Tuveson (2018). "Transcriptional Regulation by Nrf2." Antioxid  
1363 Redox Signal **29**(17): 1727-1745.
- 1364 Tong, K. I., Y. Katoh, H. Kusunoki, K. Itoh, T. Tanaka and M. Yamamoto (2006). "Keap1 recruits  
1365 Neh2 through binding to ETGE and DLG motifs: characterization of the two-site molecular  
1366 recognition model." Mol Cell Biol **26**(8): 2887-2900.
- 1367 Tong, K. I., A. Kobayashi, F. Katsuoka and M. Yamamoto (2006). "Two-site substrate recognition  
1368 model for the Keap1-Nrf2 system: a hinge and latch mechanism." Biol Chem **387**(10-11):  
1369 1311-1320.
- 1370 Tong, K. I., B. Padmanabhan, A. Kobayashi, C. Shang, Y. Hirotsu, S. Yokoyama and M.  
1371 Yamamoto (2007). "Different electrostatic potentials define ETGE and DLG motifs as hinge and  
1372 latch in oxidative stress response." Mol Cell Biol **27**(21): 7511-7521.
- 1373 Watai, Y., A. Kobayashi, H. Nagase, M. Mizukami, J. McEvoy, J. D. Singer, K. Itoh and M.  
1374 Yamamoto (2007). "Subcellular localization and cytoplasmic complex status of endogenous  
1375 Keap1." Genes Cells **12**(10): 1163-1178.
- 1376 Xue, M., H. Momiji, N. Rabbani, G. Barker, T. Bretschneider, A. Shmygol, D. A. Rand and P. J.  
1377 Thornalley (2015). "Frequency Modulated Translocational Oscillations of Nrf2 Mediate the  
1378 Antioxidant Response Element Cytoprotective Transcriptional Response." Antioxid Redox Signal  
1379 **23**(7): 613-629.
- 1380 Yamamoto, M., T. W. Kensler and H. Motohashi (2018). "The KEAP1-NRF2 System: a  
1381 Thiol-Based Sensor-Effector Apparatus for Maintaining Redox Homeostasis." Physiol Rev **98**(3):  
1382 1169-1203.
- 1383 Yamamoto, T., T. Suzuki, A. Kobayashi, J. Wakabayashi, J. Maher, H. Motohashi and M.  
1384 Yamamoto (2008). "Physiological significance of reactive cysteine residues of Keap1 in  
1385 determining Nrf2 activity." Mol Cell Biol **28**(8): 2758-2770.
- 1386 Yasuda, D., A. Yuasa, R. Obata, M. Nakajima, K. Takahashi, T. Ohe, Y. Ichimura, M. Komatsu, M.  
1387 Yamamoto, R. Imamura, H. Kojima, T. Okabe, T. Nagano and T. Mashino (2017). "Discovery of  
1388 benzo[g]indoles as a novel class of non-covalent Keap1-Nrf2 protein-protein interaction  
1389 inhibitor." Bioorg Med Chem Lett **27**(22): 5006-5009.
- 1390 Zhang, Q. and M. E. Andersen (2007). "Dose response relationship in anti-stress gene regulatory  
1391 networks." PLoS Comput Biol **3**(3): e24.

- 1392 Zhang, Q., S. Bhattacharya and M. E. Andersen (2013). "Ultrasensitive response motifs: basic  
1393 amplifiers in molecular signalling networks." Open Biol **3**(4): 130031.
- 1394 Zhang, Q., S. Bhattacharya, J. Pi, R. A. Clewell, P. L. Carmichael and M. E. Andersen (2015).  
1395 "Adaptive Posttranslational Control in Cellular Stress Response Pathways and Its Relationship to  
1396 Toxicity Testing and Safety Assessment." Toxicol Sci **147**(2): 302-316.
- 1397 Zhang, Q., J. Pi, C. G. Woods and M. E. Andersen (2009). "Phase I to II cross-induction of  
1398 xenobiotic metabolizing enzymes: a feedforward control mechanism for potential hormetic  
1399 responses." Toxicol Appl Pharmacol **237**(3): 345-356.
- 1400 Zhang, Q., J. Pi, C. G. Woods and M. E. Andersen (2010). "A systems biology perspective on  
1401 Nrf2-mediated antioxidant response." Toxicol Appl Pharmacol **244**(1): 84-97.
- 1402 Zipper, L. M. and R. T. Mulcahy (2002). "The Keap1 BTB/POZ dimerization function is required to  
1403 sequester Nrf2 in cytoplasm." J Biol Chem **277**(39): 36544-36552.  
1404



1405

## Tables

**Table 1. KEAP1-NRF2 Model Features**

| <b>Model #</b> | <b>Model structure</b> | <b>Cycle mode of operation</b> | <b>Two-step ETGE binding</b> | <b>NRF2 nuclear translocation</b> | <b>Class of NRF2 activator</b> |
|----------------|------------------------|--------------------------------|------------------------------|-----------------------------------|--------------------------------|
| 1              | Fig. 1                 |                                |                              |                                   | I-V                            |
| 2              | Fig. 1                 | X                              |                              |                                   | I-V                            |
| 3a             | Fig. 4A                | X                              | X                            |                                   | I-V                            |
| 3b             | Fig. 8A                | X                              | X                            |                                   | VI                             |
| 4a             | Fig. 9A                | X                              | X                            | X                                 | I-V                            |
| 4b             | Fig. 10A               | X                              | X                            | X                                 | VI                             |

Note: X denotes that a model has the corresponding feature. The structure of each model is illustrated in the Figures indicated.

1406

## Figure Legend

1407  
1408 **Figure 1. Structure of KEAP1-NRF2 Models 1 and 2.** The models feature one-step ETGE  
1409 binding and interaction with class I-V activator. Short arrow bars next to a parameter symbol  
1410 denote the direction of the reversible binding described by the parameter.  $\Phi$  denotes degradation.  
1411 These denotations apply to all other model structures.

1412  
1413 **Figure 2. Dynamical and steady-state behaviors of Model 1. (A)** Dynamical changes of basal  
1414  $NRF2_{free}$ ,  $KEAP1\_NRF2_{open}$ ,  $KEAP1\_NRF2_{closed}$ , and  $NRF2_{tot}$  in response to termination of NRF2  
1415 synthesis (by setting  $k_0=0$ ) starting at 0 min with  $k_6$  at default value. **(B)** Dynamical changes of  
1416 various NRF2 species in response to stabilization of NRF2 in  $KEAP1\_NRF2_{closed}$  by setting  
1417  $k_6=1.178E-4$  starting at 0 min and in response to termination of NRF2 synthesis (by setting  $k_0=0$ )  
1418 starting at 500 min. For simulations in (A) and (B),  $CLASS_{I-V}$  level is kept at zero. **(C)** Steady-state  
1419 dose-response curves of various NRF2 species and  $KEAP1_{free}$  for  $CLASS_{I-V}$  on dual-log scale  
1420 with  $k'_6$  at default value.  $n_H$  and  $LRC_{max}$  for  $NRF2_{total}$  are 1.17 and 0.40 respectively (not shown).  
1421 **(D)** Steady-state dose-response curves of  $NRF2_{free}$  in (C) on dual-linear scale illustrating  
1422 sigmoidal shape, with  $n_H$  and  $LRC_{max}$  indicated.

1423  
1424 **Figure 3. Dynamical and steady-state behaviors of Model 2. (A)** Dynamical changes of basal  
1425  $NRF2_{free}$ ,  $KEAP1\_NRF2_{open}$ ,  $KEAP1\_NRF2_{closed}$ , and  $NRF2_{tot}$  in response to termination of NRF2  
1426 synthesis (by setting  $k_0=0$ ) starting at 0 min with  $k_6$  at default value. **(B)** Dynamical changes of  
1427 various NRF2 species in response to stabilization of NRF2 in  $KEAP1\_NRF2_{closed}$  by setting  
1428  $k_6=1.454E-4$  starting at 0 min and in response to termination of NRF2 synthesis (by setting  $k_0=0$ )  
1429 starting at 500 min. For simulations in (A) and (B),  $CLASS_{I-V}$  level is kept at zero. **(C-E)**  
1430 Dynamical changes of  $NRF2_{tot}$  (C),  $NRF2_{free}$  (D), and  $KEAP1_{free\_tot}$  ( $KEAP1_{free}+KEAP1_{o\_free}$ ) (E) in  
1431 response to different levels of  $CLASS_{I-V}$  (ranging from 0.1 to 1E4 nM) with  $k'_6$  at default value. **(F)**  
1432 Steady-state dose-response curves of various NRF2 species and  $KEAP1_{free\_tot}$  on double-log

1433 scale with  $k'_6$  at default value. Shown are  $n_H$  and  $LRC_{max}$  for  $NRF2_{free}$ ;  $n_H$  and  $LRC_{max}$  for  $NRF2_{total}$   
1434 are 1.27 and 0.42 respectively (not shown). **(G-H)** Flux analyses for conditions when NRF2 in  
1435  $KEAP1\_NRF2_{closed}$  is stabilized by setting  $k_6$  to 30% (G) and 10% (H) of default value.

1436

1437 **Figure 4. Structure, and dynamical and steady-state behaviors of Model 3a.** **(A)** Structure of  
1438 Model 3a featuring two-step ETGE binding and interaction with class I-V activator. **(B)** Dynamical  
1439 changes of basal  $NRF2_{free}$ ,  $KEAP1\_NRF2_{open1}$ ,  $KEAP1\_NRF2_{open2}$ ,  $KEAP1\_NRF2_{closed}$ , and  
1440  $NRF2_{tot}$  in response to termination of NRF2 synthesis (by setting  $k_0=0$ ) starting at 0 min with  $k_6$  at  
1441 default value. **(C)** Dynamical changes of various NRF2 species in response to stabilization of  
1442 NRF2 in  $KEAP1\_NRF2_{closed}$  by setting  $k_6=1.252E-4$  starting at 0 min and in response to  
1443 termination of NRF2 synthesis (by setting  $k_0=0$ ) starting at 500 min. For simulations in (B) and  
1444 (C),  $CLASS_{i-v}$  level is kept at zero. Dynamical changes of **(D)**  $NRF2_{tot}$ , **(E)**  $NRF2_{free}$ , and **(F)**  
1445  $KEAP1_{free\_tot}$  in response different levels of  $CLASS_{i-v}$  with  $k'_6$  at default value. **(G)** Steady-state  
1446 dose-response curves of various NRF2 species and  $KEAP1_{free\_tot}$  on double-log scale with  $k'_6$  at  
1447 default value. Shown are  $n_H$  and  $LRC_{max}$  for  $NRF2_{free}$ ;  $n_H$  and  $LRC_{max}$  for  $NRF2_{total}$  are 1.22 and  
1448 0.42 respectively (not shown). **(H-I)** Flux analyses for conditions when NRF2 in  
1449  $KEAP1\_NRF2_{closed}$  is stabilized by setting  $k_6$  to 30% (H) and 10% (I) of default value.

1450

1451 **Figure 5. Effects of KEAP1-NRF2 binding parameters on NRF2 responses in Model 3a.**  
1452 Effects of varying **(A-B)**  $k_1$  ( $k'_1$ ), **(C-D)**  $k_{1.1}$  ( $k'_{1.1}$ ), **(E-F)**  $k_{2.1}$  ( $k'_{2.1}$ ), and **(G-H)**  $k_3$  ( $k'_3$ ) on steady-state  
1453 dose-response curves of  $NRF2_{tot}$  (left panels) and  $NRF2_{free}$  (right panels). Note  $k_i=k'_i$  for  $i = 1, 1.1,$   
1454  $2.1,$  or  $3$ ;  $x0.1, x1,$  and  $x10$  denote 0.1, 1, and 10 times default values.

1455

1456 **Figure 6. Effects of varying parameter  $k'_3$  alone on NRF2 responses in Model 3a to test**  
1457 **hinge-latch hypothesis - with  $k'_6$  at default value.** Dynamical changes of  $KEAP1\_NRF2_{open\_tot}$   
1458 and  $KEAP1\_NRF2_{closed\_tot}$  in response to a high level of  $CLASS_{i-v}$  at 1000 nM starting at 0 min

1459 and in response to termination of NRF2 synthesis (by setting  $k_0=0$ ) starting at 500 min, when  $k'_3$   
1460 is **(A)** 0.1 and **(C)** 10 times of default value. Steady-state dose-response curves of  
1461  $KEAP1\_NRF2_{open\_tot}$  and  $KEAP1\_NRF2_{closed\_tot}$  when  $k'_3$  is **(B)** 0.1 and **(D)** 10 times of default  
1462 value. **(E-F)** Effects of varying  $k'_3$  on steady-state dose-response curves of  $NRF2_{tot}$  and  $NRF2_{free}$   
1463 respectively.

1464

1465 **Figure 7. Effects of total KEAP1 abundance on NRF2 responses in Model 3a.** Steady-state  
1466 dose-response curves of **(A)**  $NRF2_{tot}$  and **(B)**  $NRF2_{free}$  under different values of total KEAP1  
1467 abundance relative to default value.

1468

1469 **Figure 8. Structure, and dynamical and steady-state behaviors of Model 3b.** **(A)** Structure of  
1470 Model 3b featuring two-step ETGE binding and interaction with class VI activator. Dynamical  
1471 changes of **(B)**  $NRF2_{tot}$  and **(C)**  $NRF2_{free}$  in response different levels of  $CLASS_{VI}$ . **(D)**  
1472 Steady-state dose-response curves of  $NRF2_{tot}$  and  $NRF2_{free}$ . Shown are  $n_H$  and  $LRC_{max}$  for  
1473  $NRF2_{free}$ ;  $n_H$  and  $LRC_{max}$  for  $NRF2_{total}$  are 1.35 and 0.35 respectively (not shown). **(E)**  
1474 Steady-state dose-response curves of  $KEAP1\_NRF2_{open\_tot}$ ,  $KEAP1\_NRF2_{closed\_tot}$ ,  
1475  $ClassVI_1\_KEAP1$  (Class VI activator-KEAP1 complex containing one activator molecule) and  
1476  $ClassVI_2\_KEAP1$  (containing two activator molecules). **(F-G)** Steady-state oxidant-response  
1477 curves of  $NRF2_{tot}$ ,  $NRF2_{free}$ ,  $KEAP1\_NRF2_{open\_tot}$ ,  $KEAP1\_NRF2_{closed\_tot}$ , and  $ClassVI_1\_KEAP1$   
1478 under condition when only one class VI activator molecule is allowed to bind to KEAP1 by setting  
1479  $k'_7=k'_8=0$ .

1480

1481 **Figure 9. Structure, and dynamical and steady-state behaviors of Model 4a.** **(A)** Structure of  
1482 Model 4a featuring two-step ETGE binding, nuclear NRF2 translocation, and interaction with  
1483 class I-V activator. **(B)** Dynamical changes of basal  $NRF2_{tot\_cell}$ ,  $NRF2_{tot\_nucleus}$ ,  $NRF2_{tot\_cytosol}$ ,  
1484  $NRF2_{free\_nucleus}$ , and  $NRF2_{free\_cytosol}$  in response to termination of NRF2 synthesis (by setting  $k_0=0$ )

1485 starting at 0 min. **(C)**  $NRF2_{tot\_cell}$ ,  $NRF2_{tot\_nucleus}$ , and  $NRF2_{tot\_cytosol}$  in (B) shown in log Y scale. **(D)**  
1486 Dynamical changes of various NRF2 species previously induced by a high level of  $CLASS_{I-V}$  at  
1487 1000 nM in response to termination of NRF2 synthesis (by setting  $k_0=0$ ) starting at 0 min. **(E)**  
1488 Steady-state dose-response curves of various NRF2 species.  $n_H$  and  $LRC_{max}$  of  $NRF2_{free\_nucleus}$   
1489 curve are indicated.

1490

1491 **Figure 10. Structure, and dynamical and steady-state behaviors of Model 4b.** **(A)** Structure  
1492 of Model 4b featuring two-step ETGE binding, nuclear NRF2 translocation, and interaction with  
1493 class VI activator. Dynamical changes of **(B)**  $NRF2_{free\_cytosol}$ , **(C)**  $NRF2_{tot\_cytosol}$ , and **(D)**  
1494  $NRF2_{free\_nucleus}$  in response to different levels of  $CLASS_{VI}$ . **(E)** Dynamical changes of various  
1495 NRF2 species previously induced by a high level of  $CLASS_{VI}$  at 1000 nM in response to  
1496 termination of NRF2 synthesis (by setting  $k_0=0$ ) starting at 0 min. **(F-G)** Steady-state  
1497 dose-response curves of various NRF2 species and KEAP1 species respectively.

1498

1499 **Figure 11. Water-tank analogy and reduced KEAP1-NRF2 mathematical model.** **(A)**  
1500 Schematic illustration of the water-tank analogy for KEAP1-dependent NRF2 degradation,  
1501 sequestration, and nuclear translocation. Large tank: cytosol, small tank: nucleus, height of large  
1502 tank: total cytosolic KEAP1 abundance, water: NRF2, tap: NRF2 production, drain:  
1503 KEAP1-mediated NRF2 degradation, stopper: oxidant or NRF2 inducer. To reduce clutter for  
1504 clarity, KEAP1-independent NRF2 degradation and nuclear NRF2 degradation are not shown. **(B)**  
1505 Reduced KEAP1-NRF2 mathematical model for NRF2 activation by class I-V and class VI  
1506 activators. **(C)** Predicted differential free nuclear NRF2 dose-response for class I-V and class VI  
1507 activators.

1508

# Figure 1

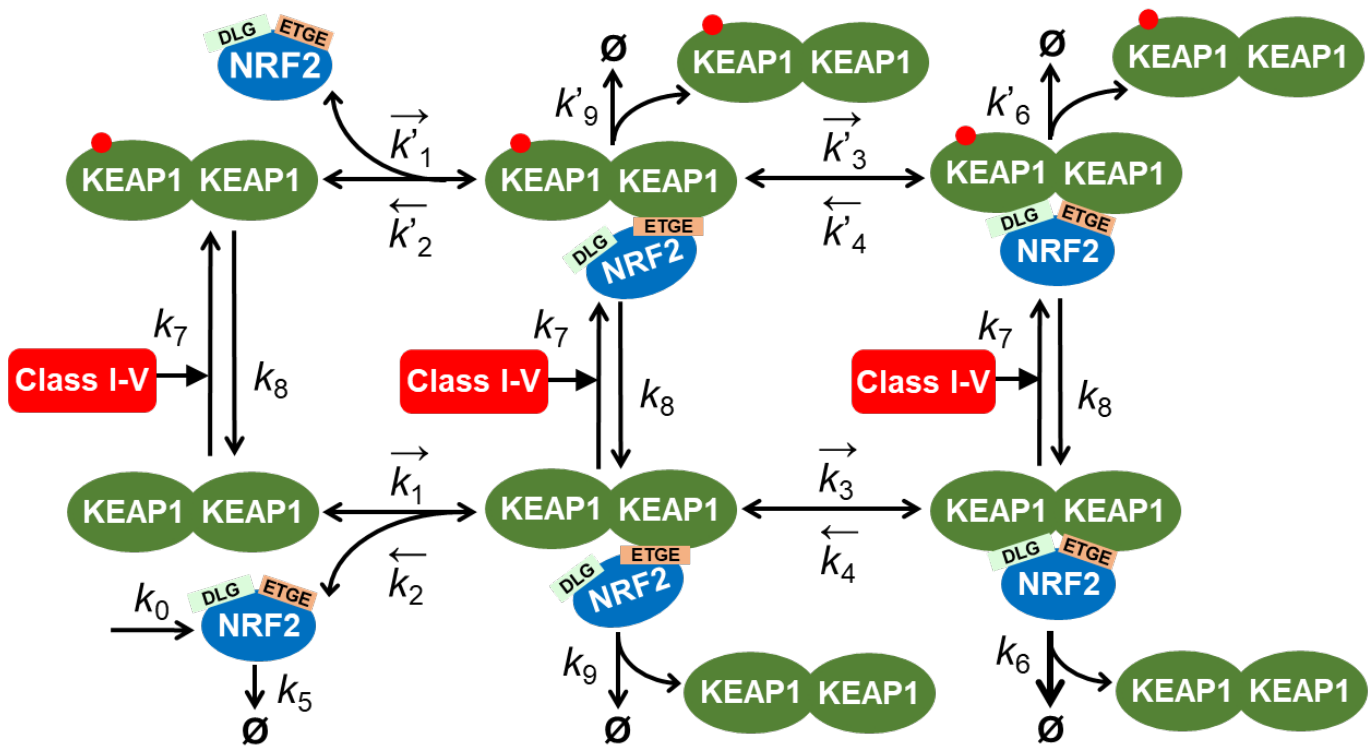

# Figure 2

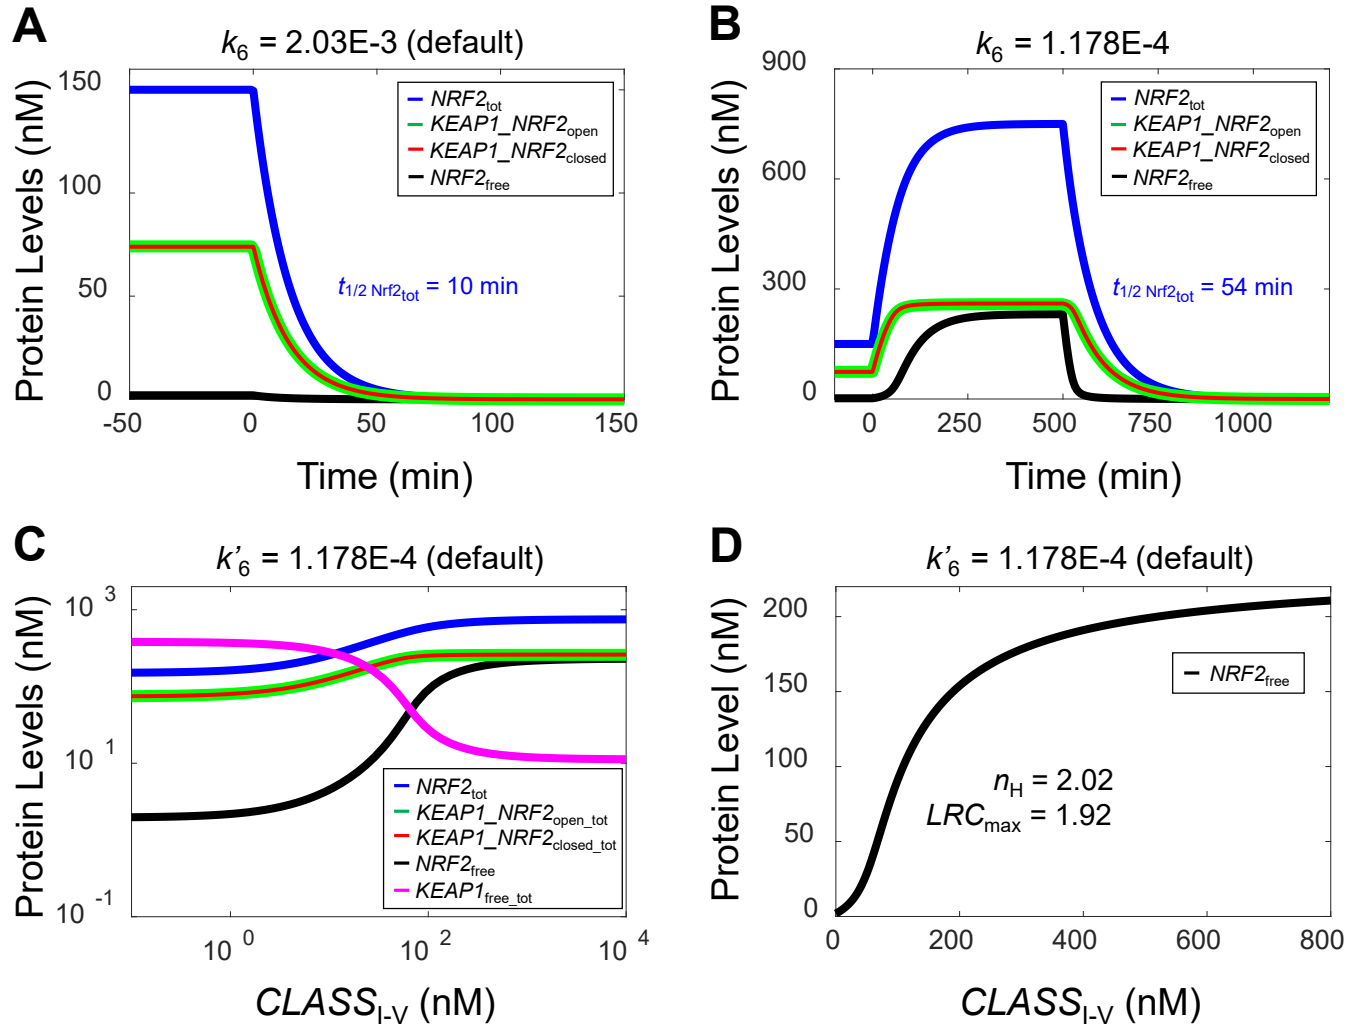

# Figure 3

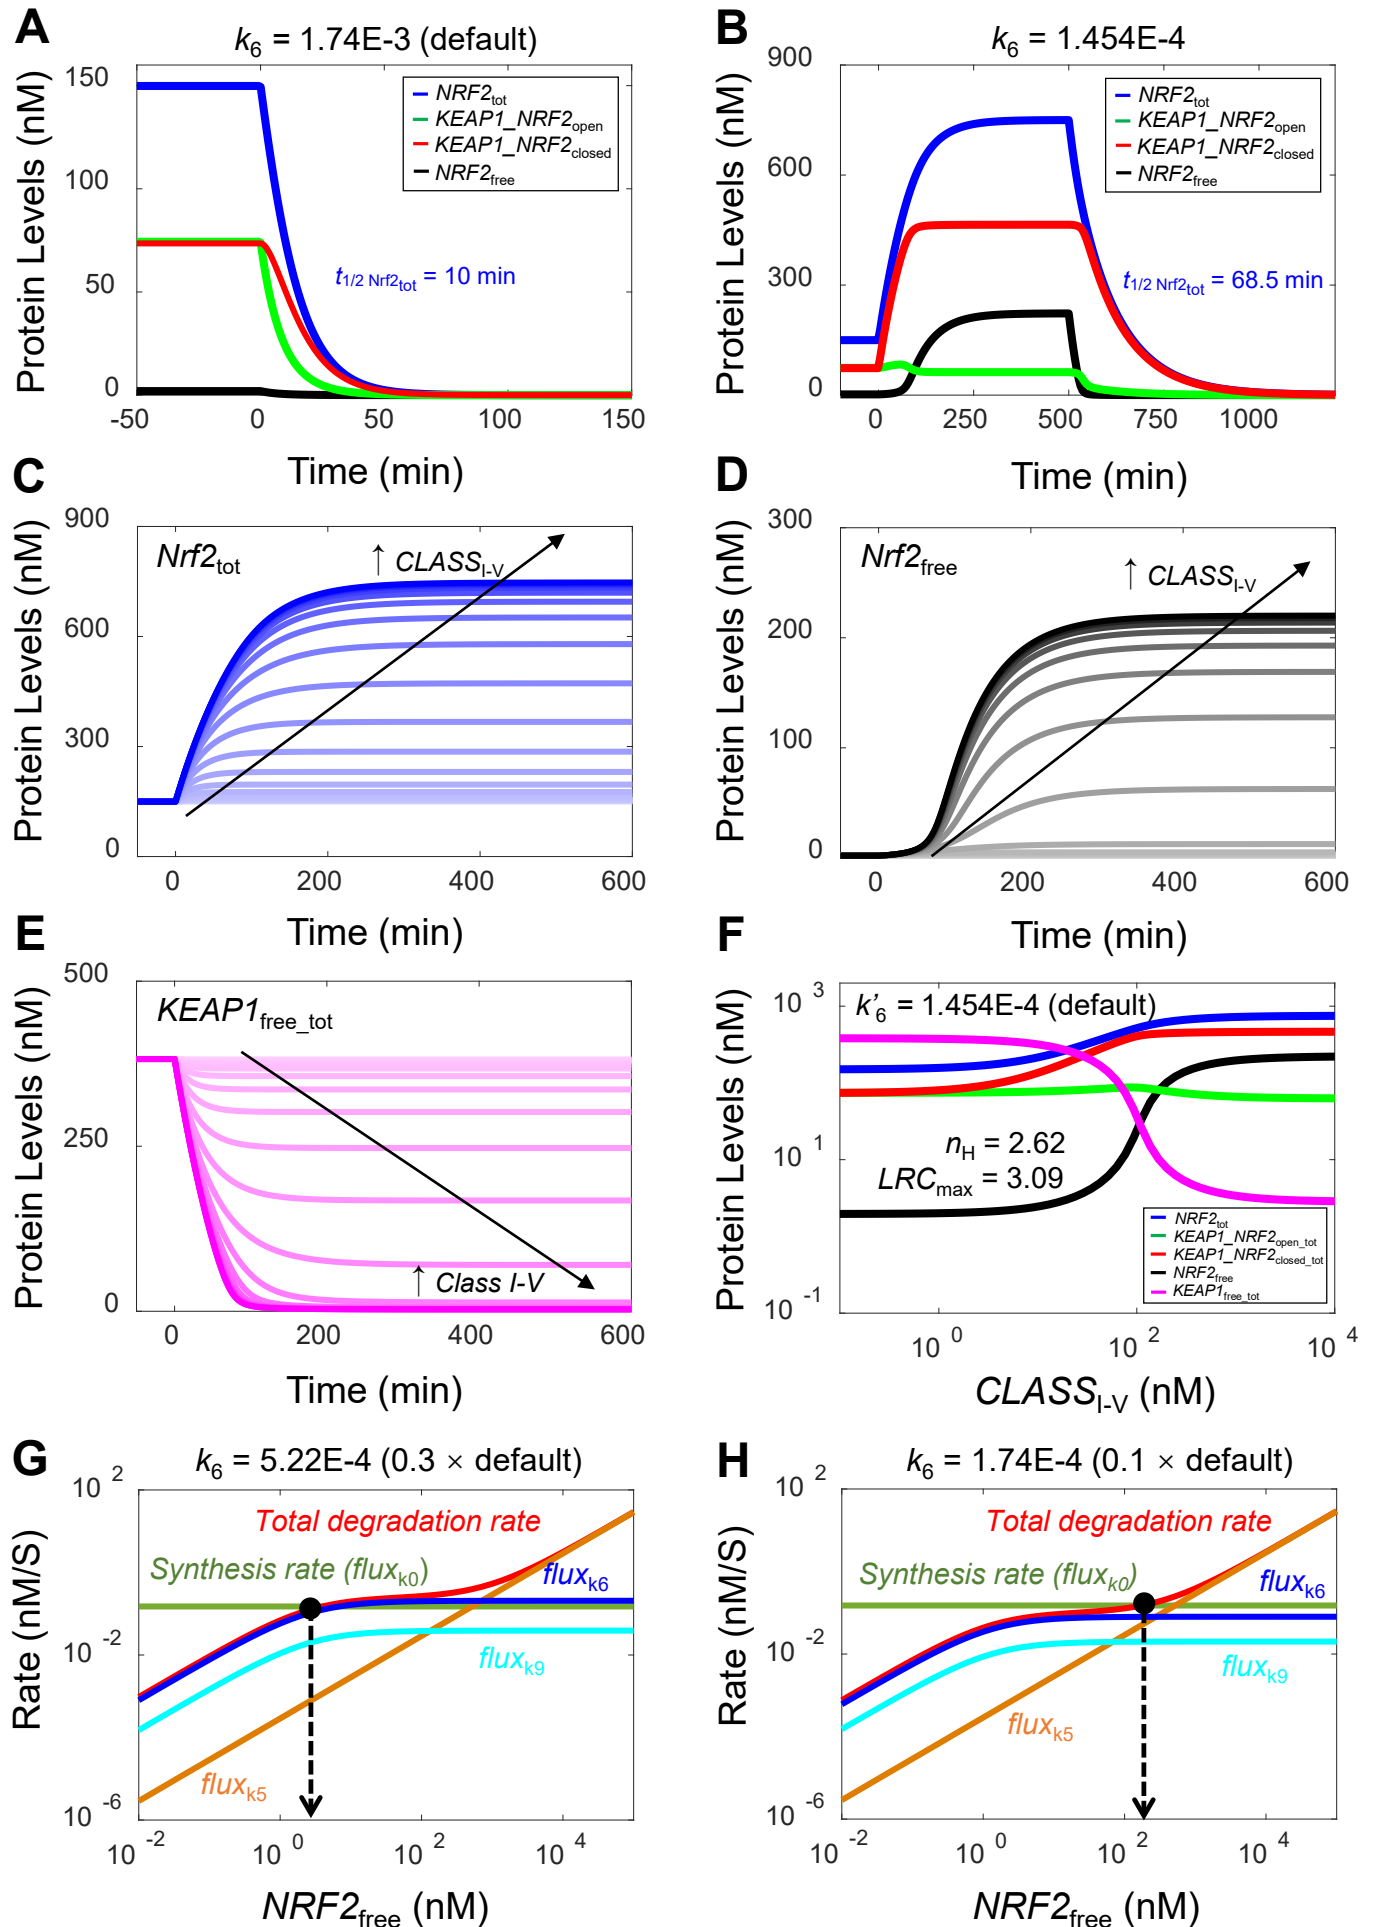



# Figure 4

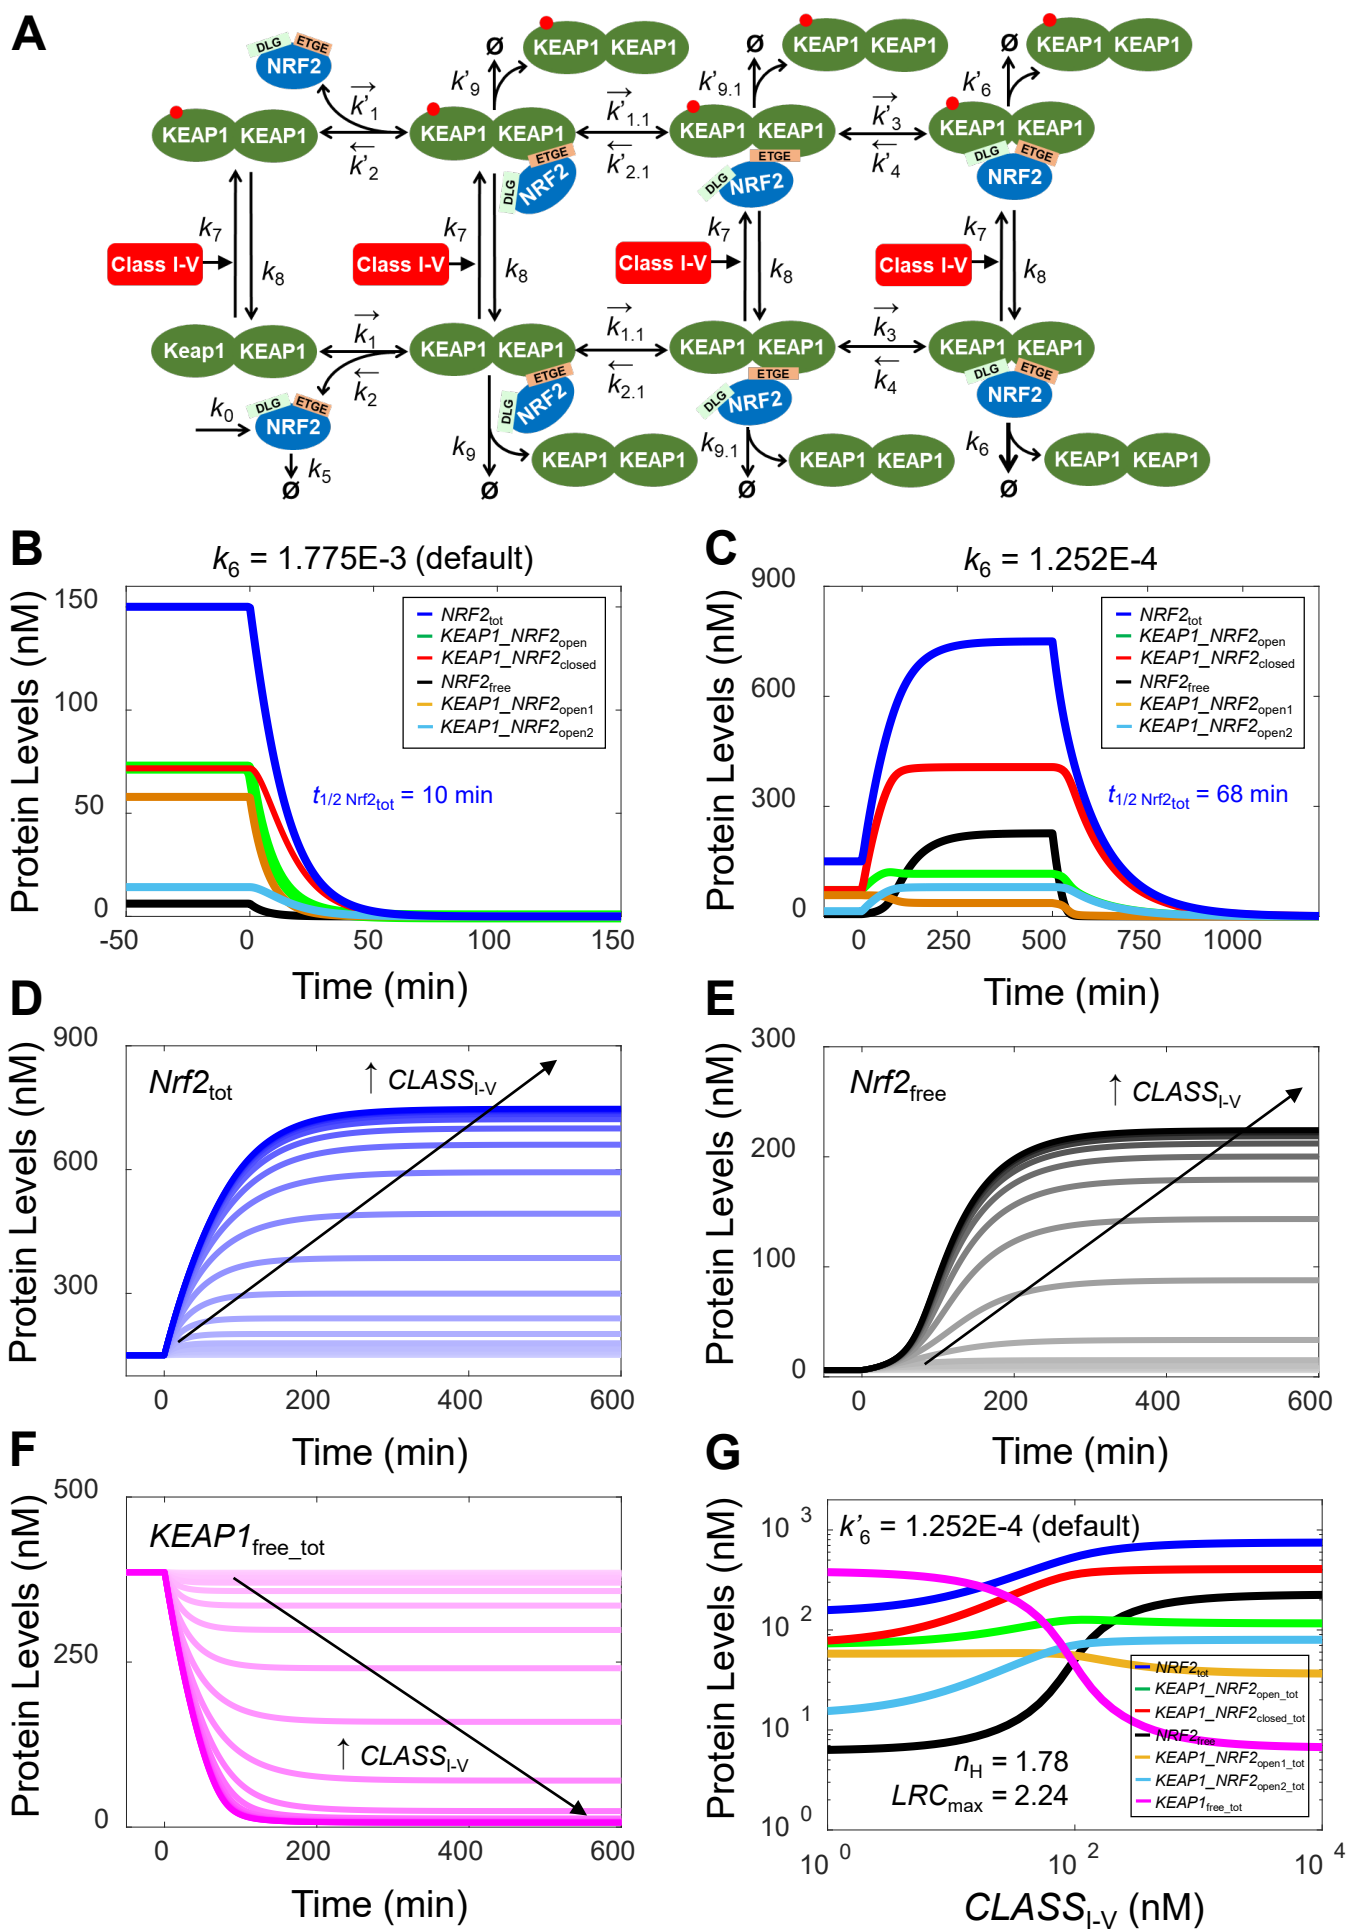

# Figure 4 (continued)

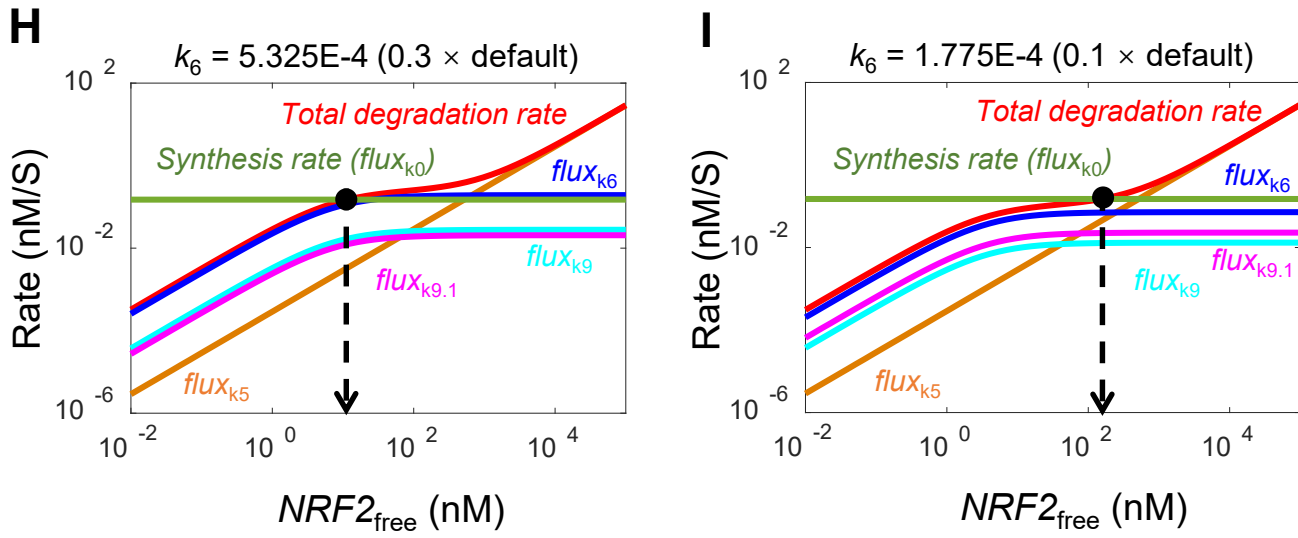

# Figure 5

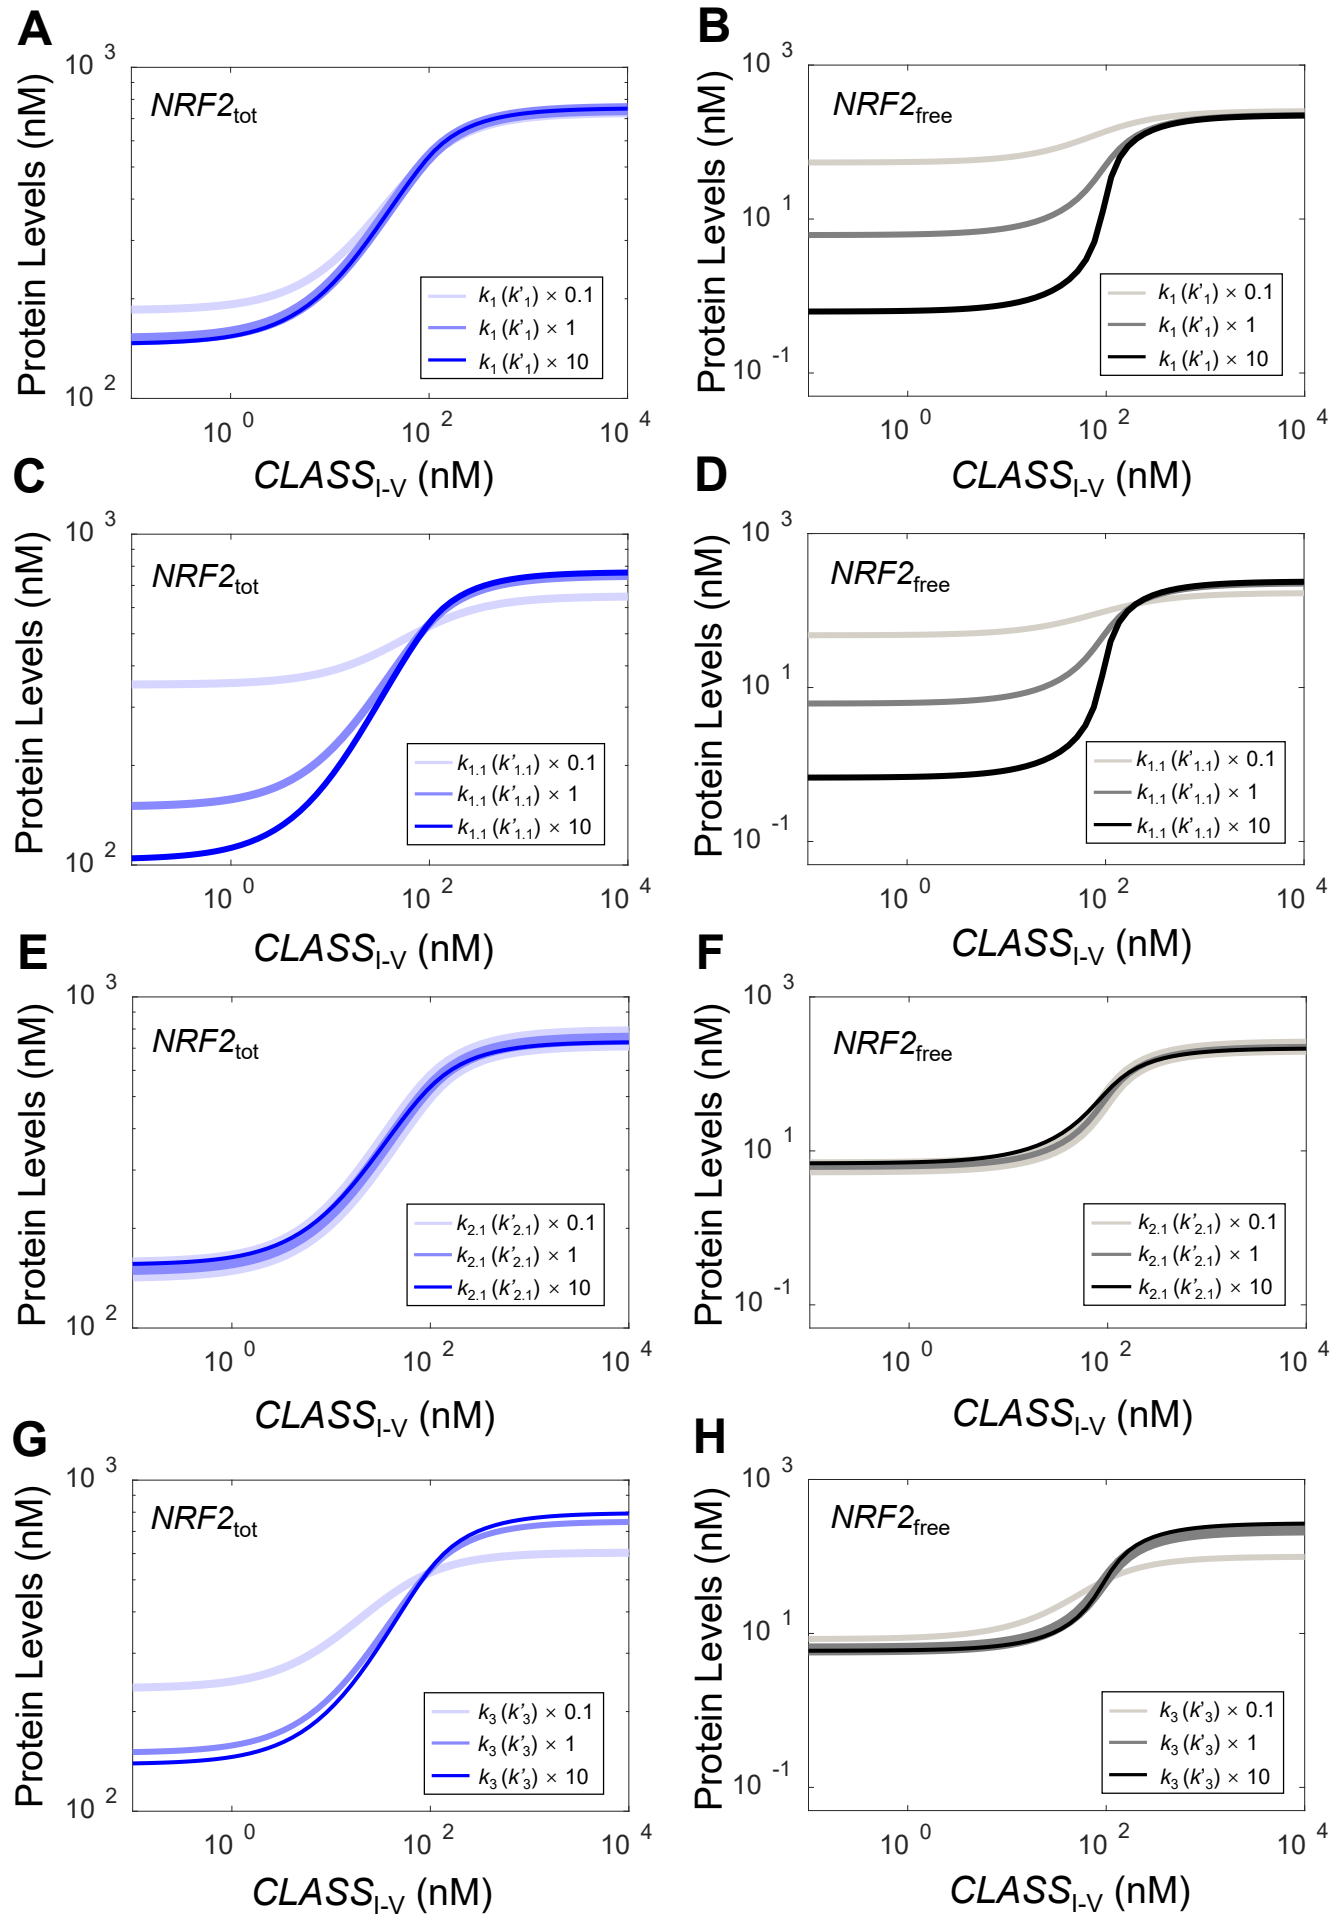

# Figure 6

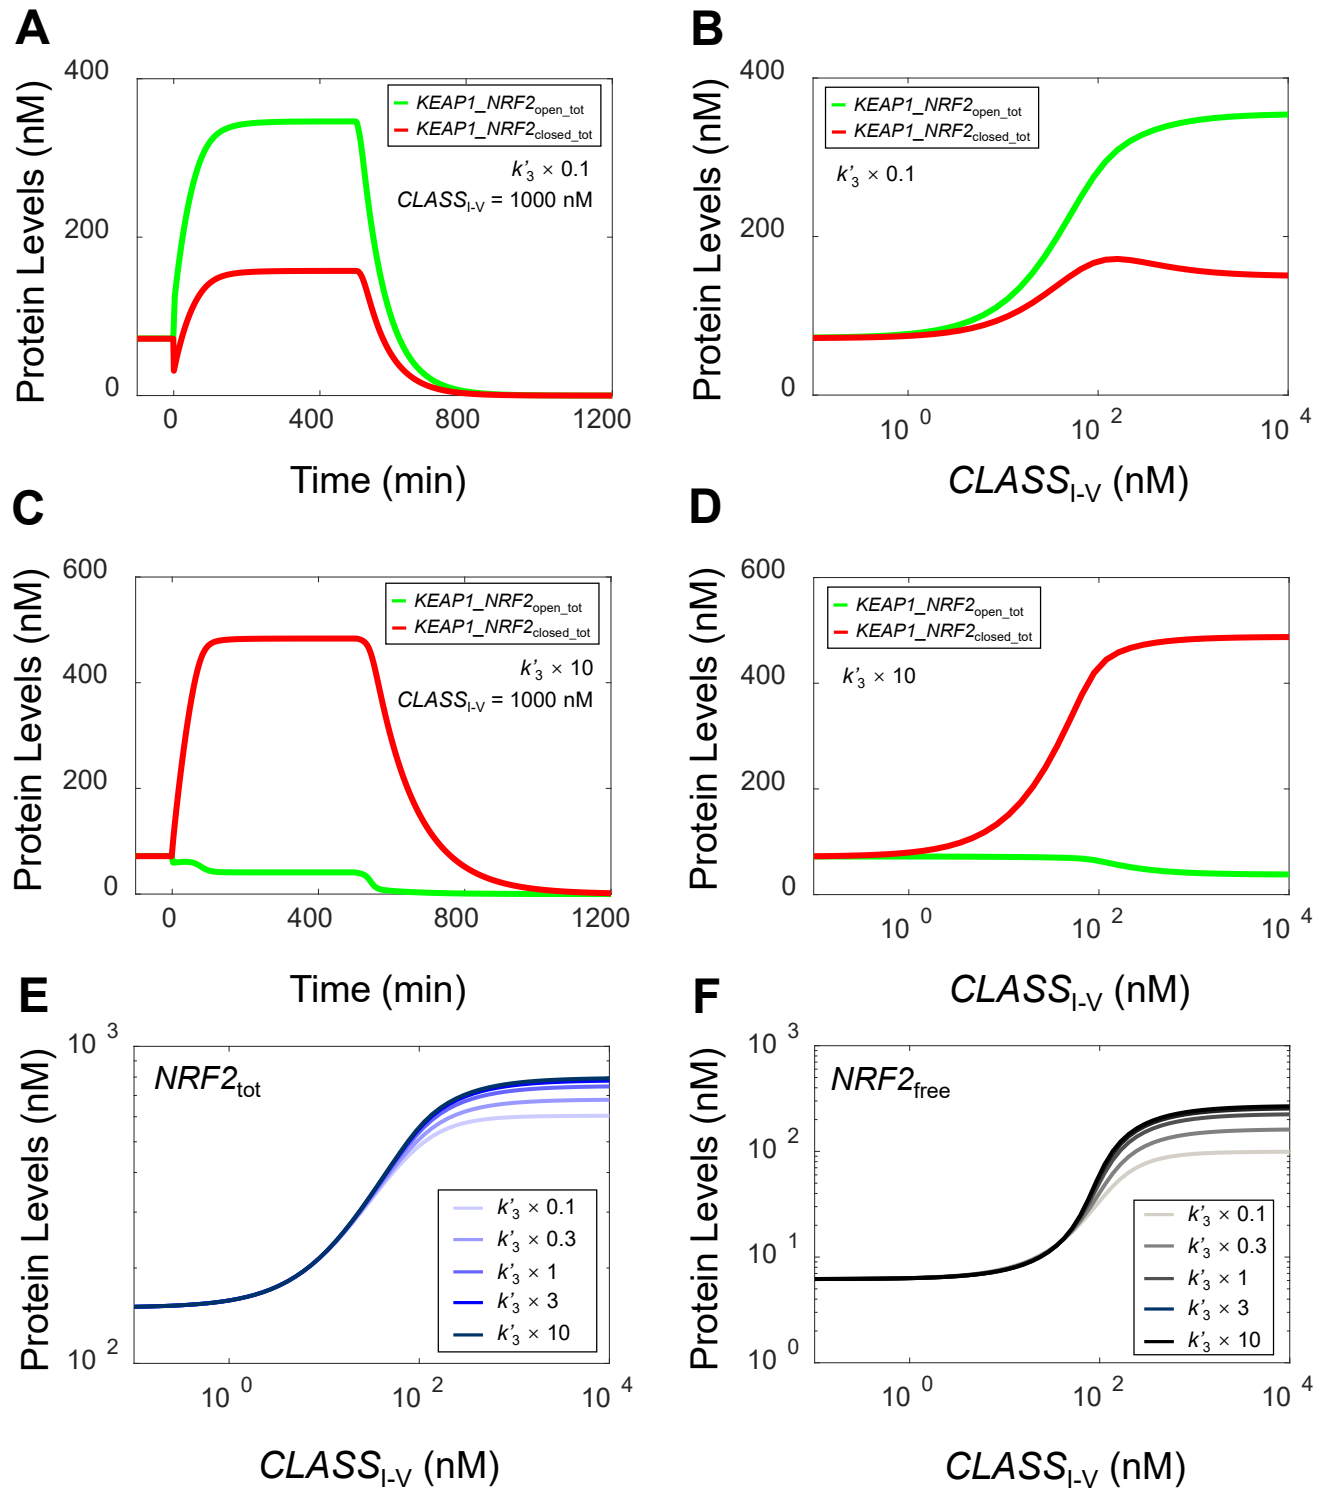

# Figure 7

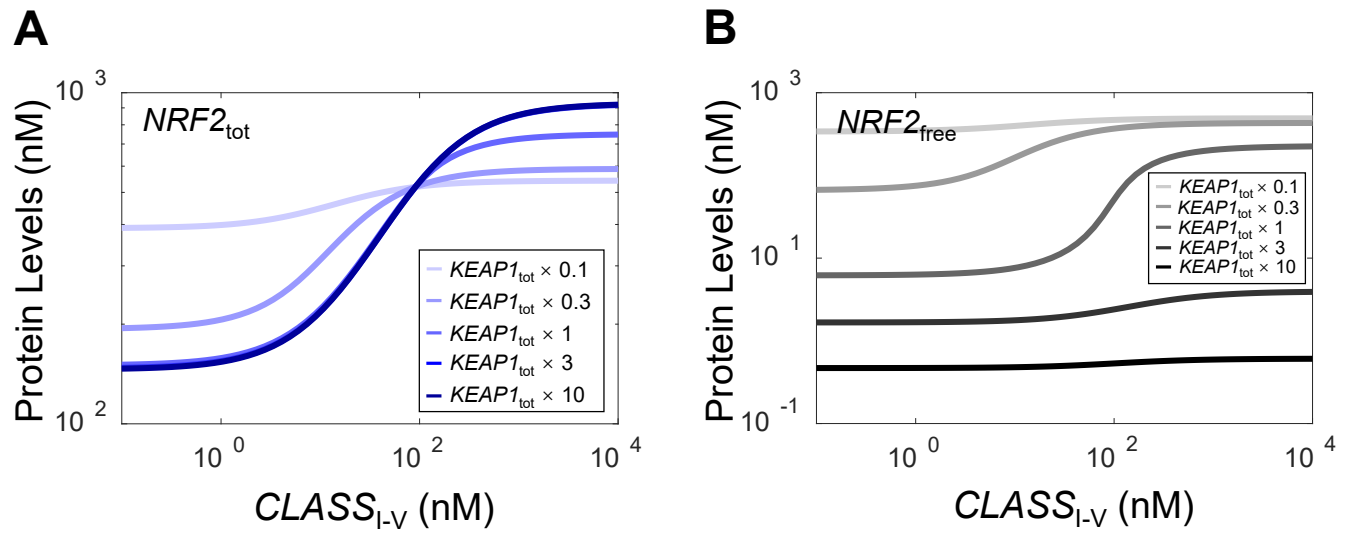

# Figure 8

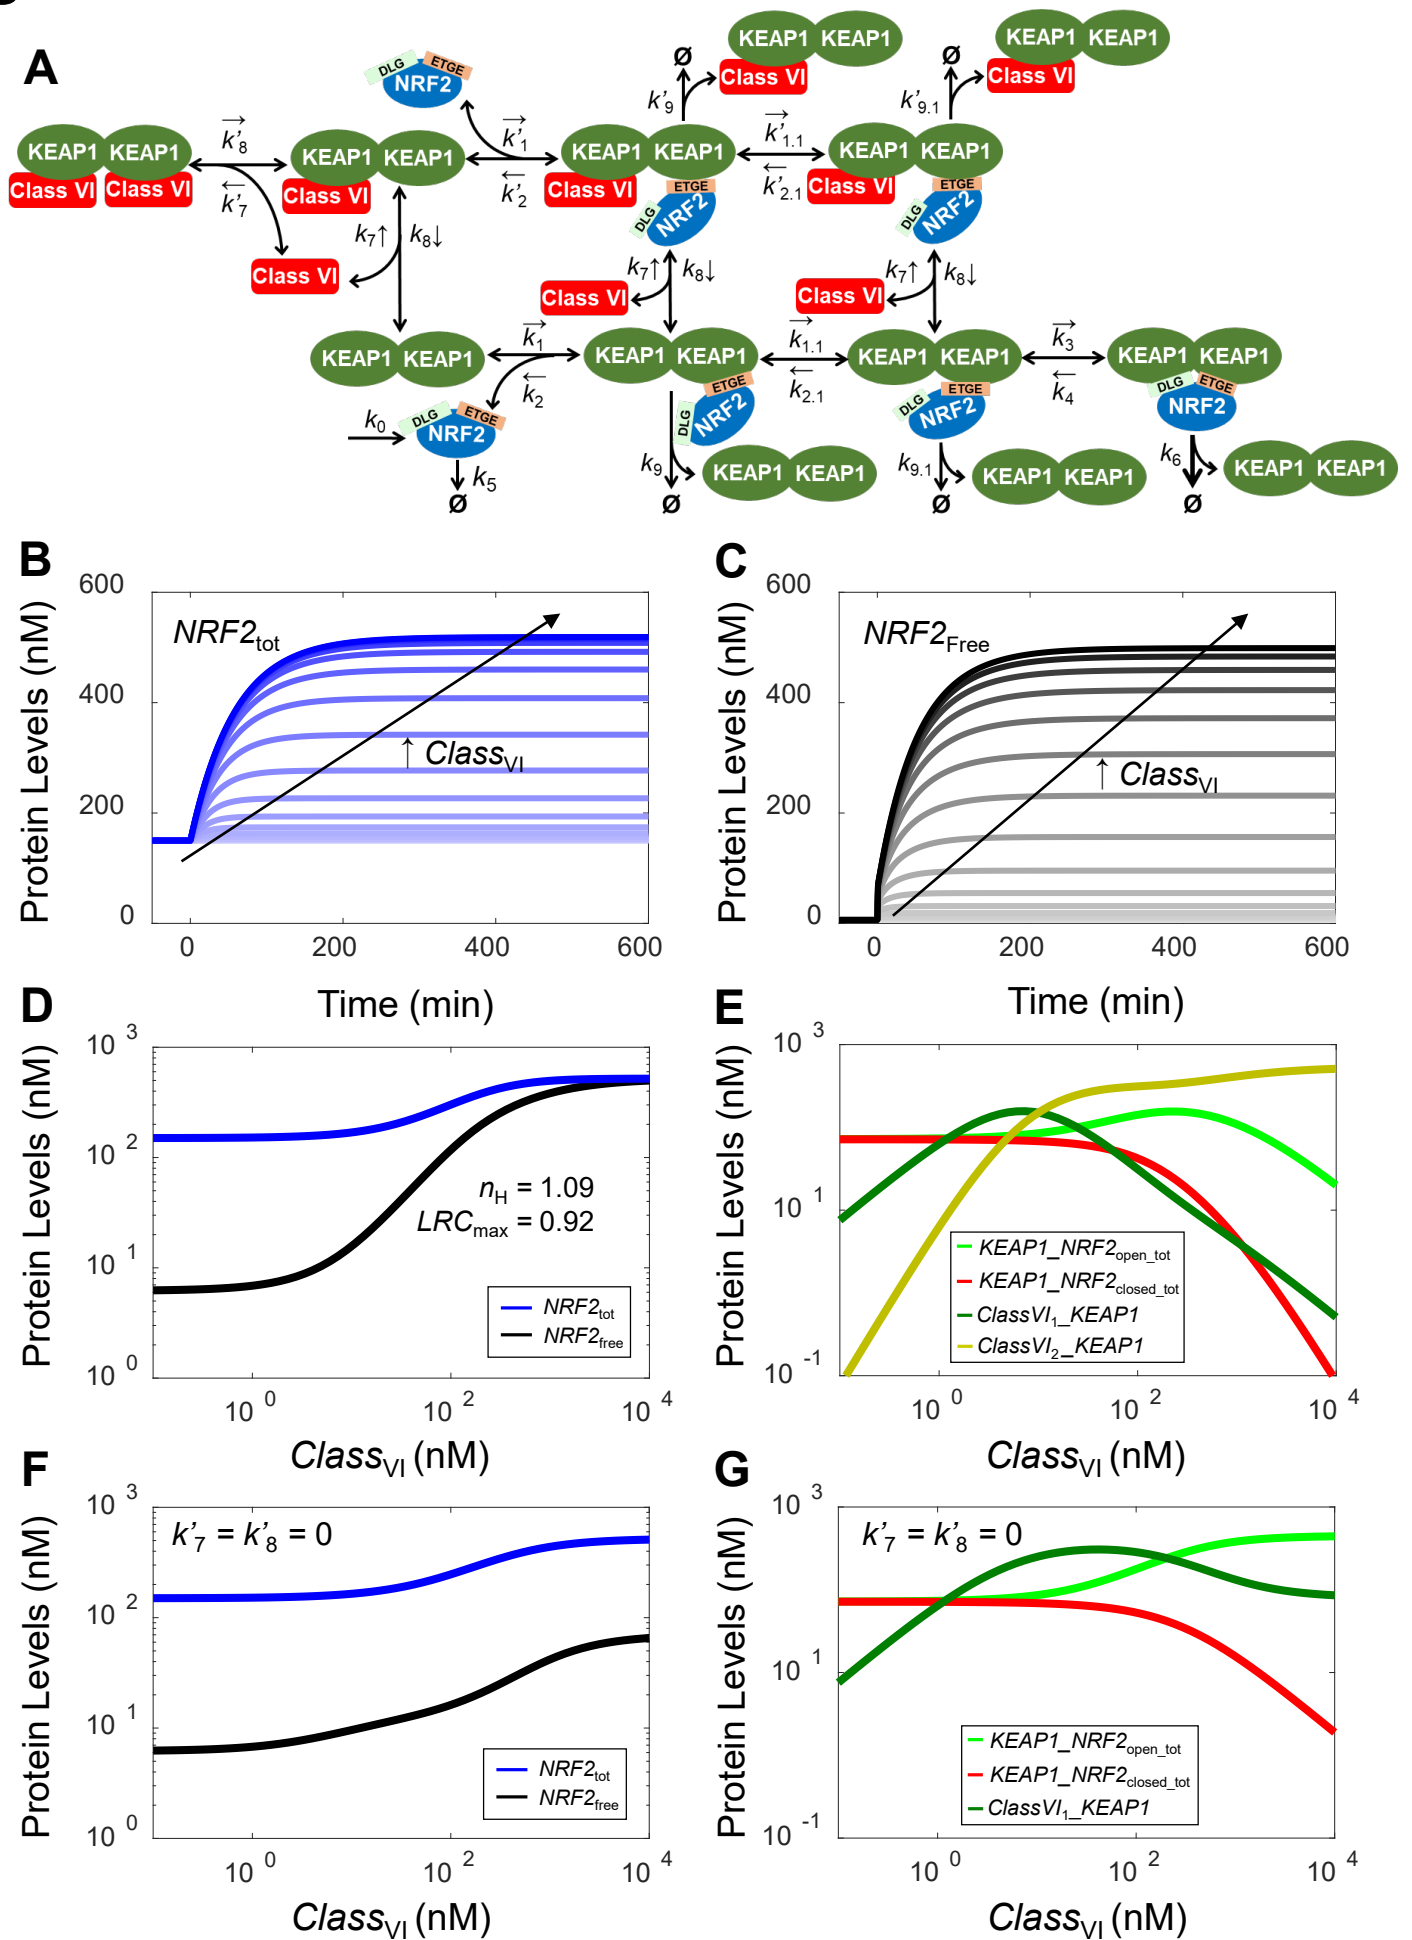

# Figure 9

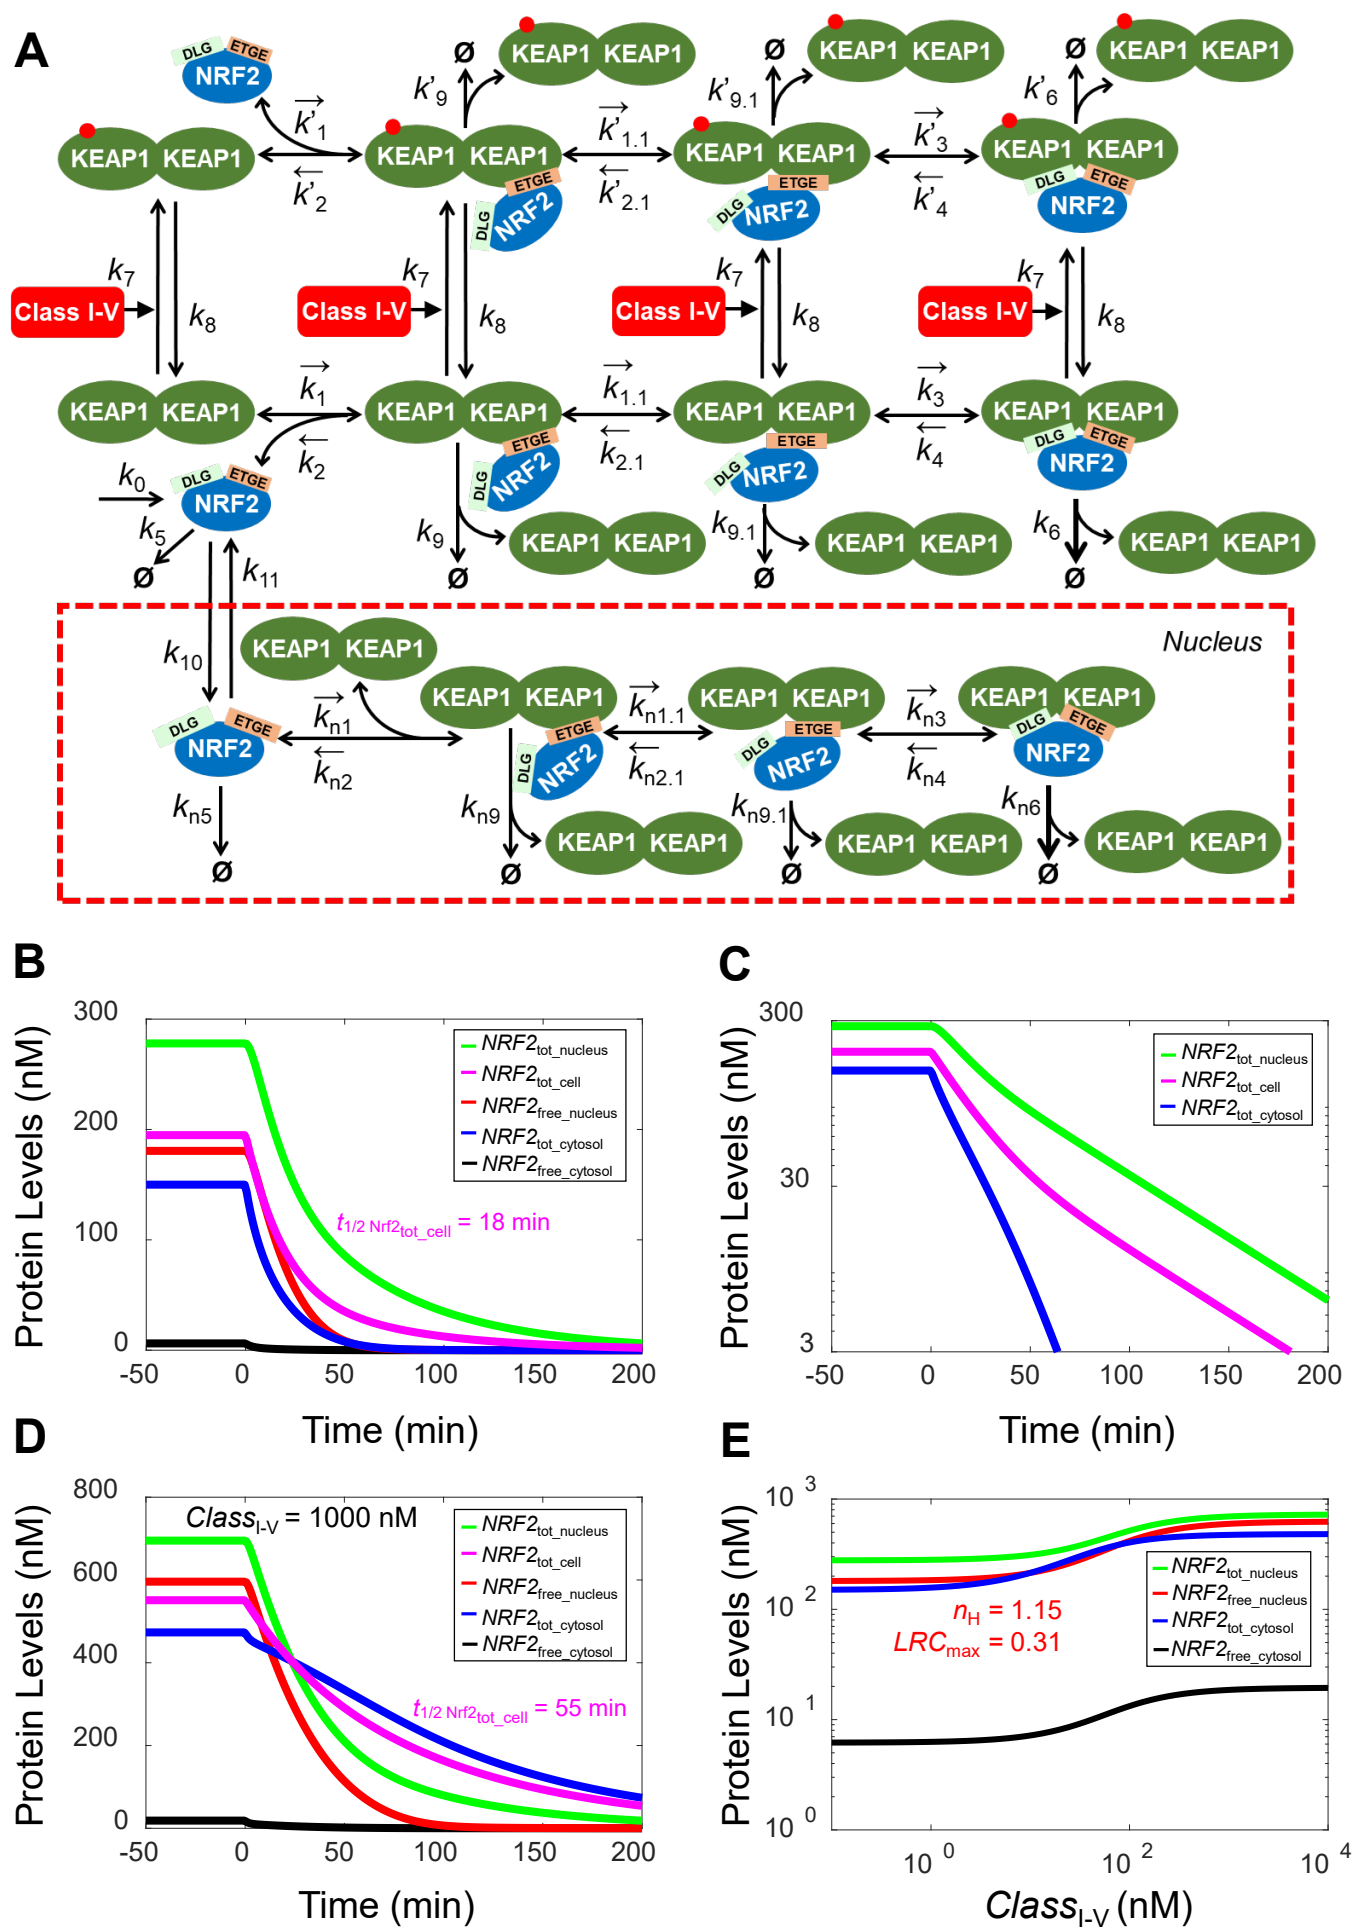

# Figure 10

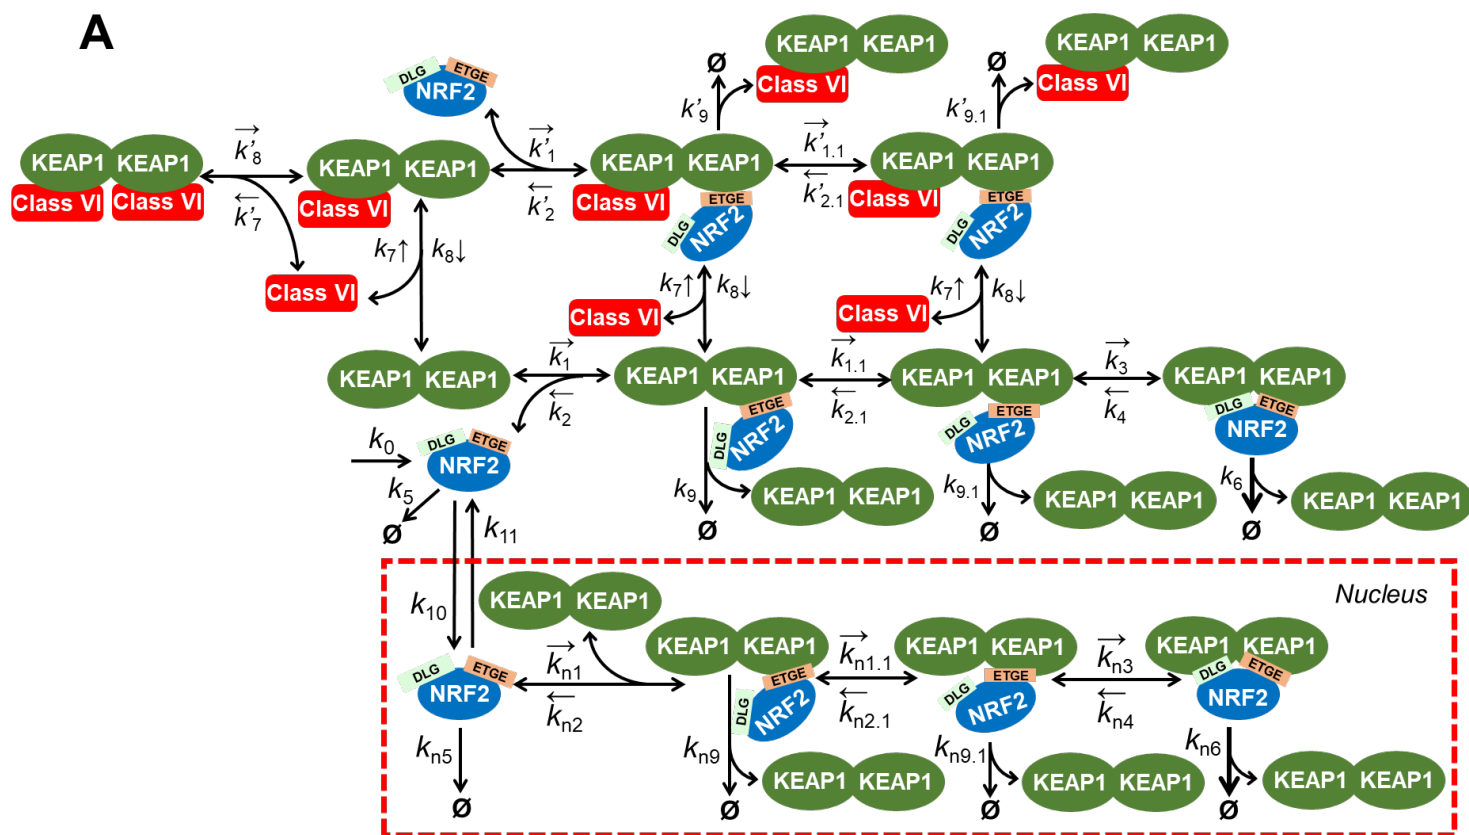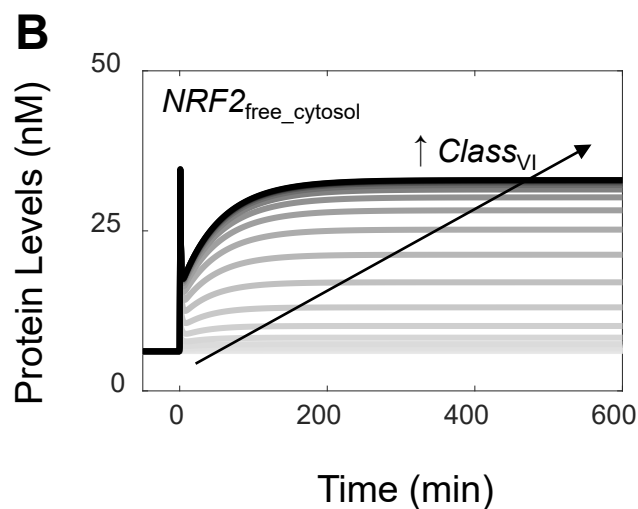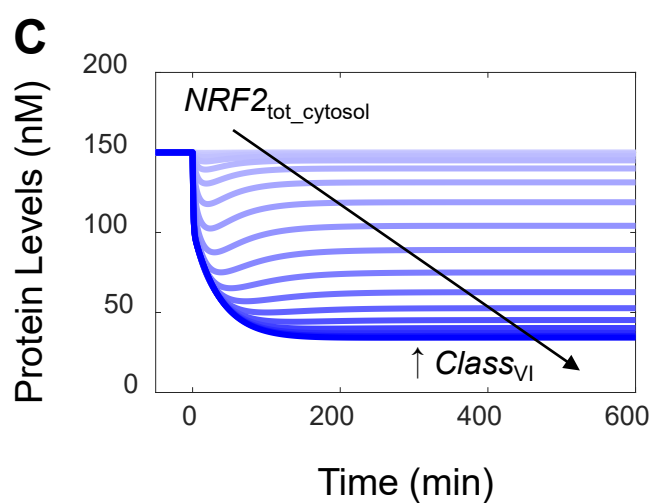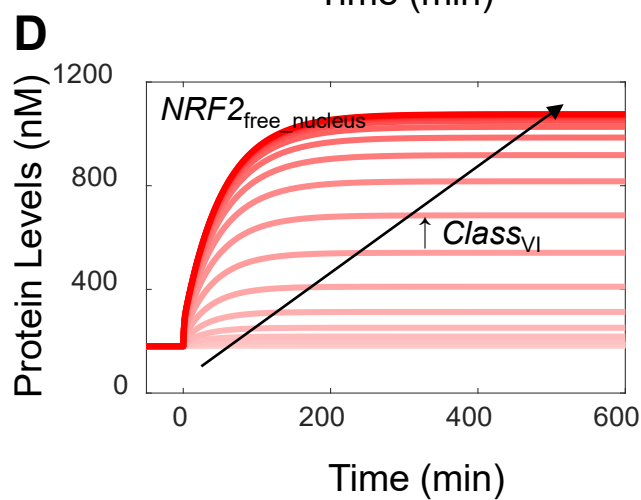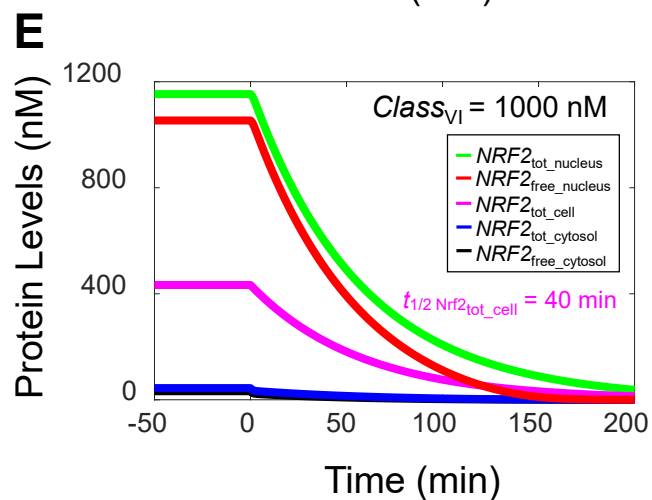



# Figure 10 (continued)

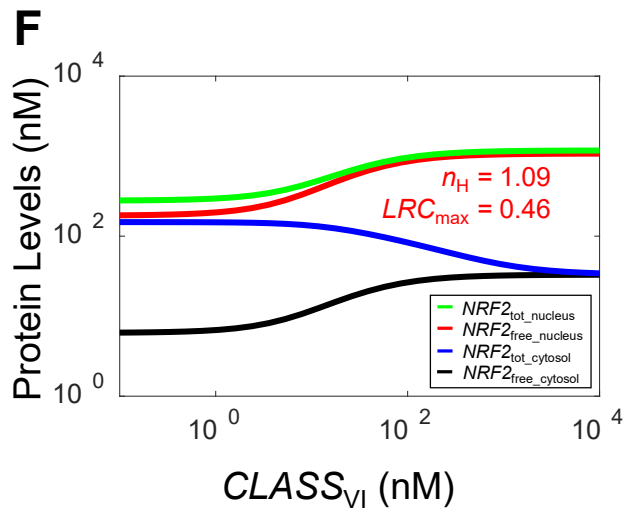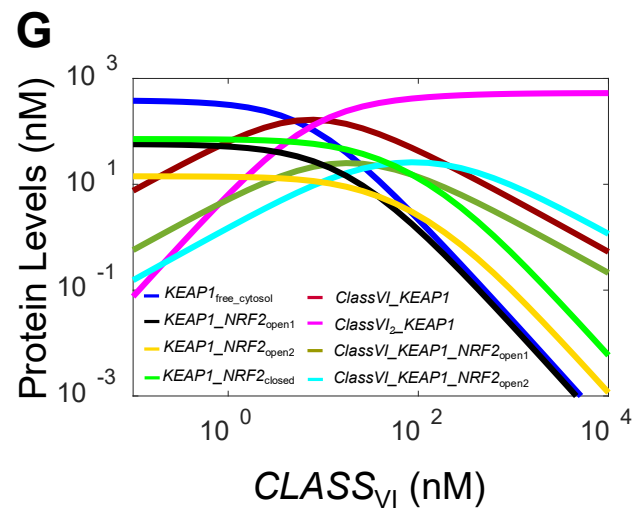

# Figure 11

**A**

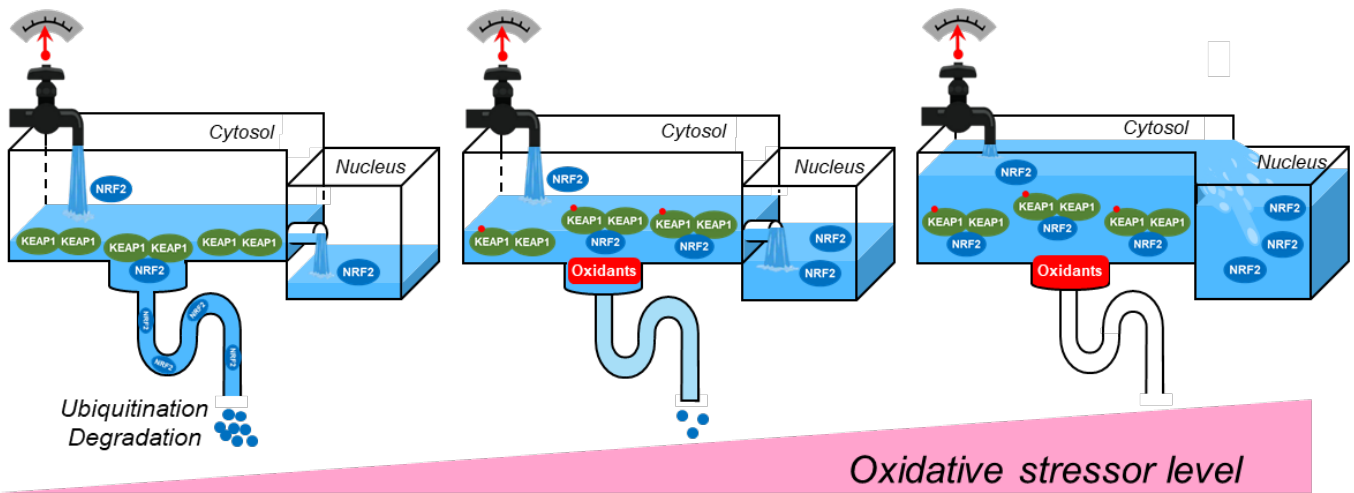

**B**

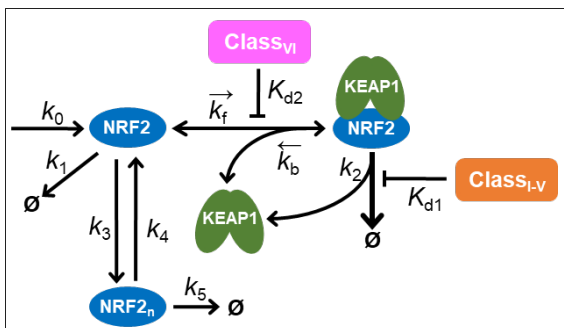

**C**

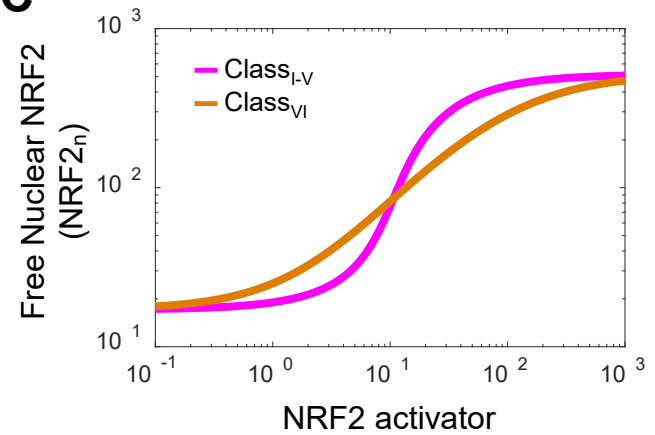

Source: http://biorxiv.org/content/10.1101/2021.08.08.455554v1.full.pdf
